# Supplementary material for: Phantom Phone Signals in youths: Prevalence, correlates and relation to psychopathology
Source: PLoS One. 2019 Jan 4;14(1):e0210095. doi: 10.1371/journal.pone.0210095 (PMC6319810; doi:10.1371/journal.pone.0210095)
Supplement: S1 File — (XLS) [file pone.0210095.s001.xls]

## Sheet: RINGANXIETY NO SMART
SEX	AGE	SMARTP_SINO	SMARTP_TIME	SMARTP_TIME_LIKERT	SMART_CHECK	SMART_CHECK_Lik	PHANTOMRING	PHANTOMRING_LIKERT	EMOTION	CONDUCT	HYPER	PEER	PROSOC	EBDTOT	sconsyd	srestles	ssomatic	sshares	stantrum	sloner	sobeys	sworries	scaring	sfidgety	sfriend	sfights	sunhappy	spopular	sdistract	sclingy	skind	slies	sbullied	shelpout	sreflect	ssteals	soldbest	safraid	sattends
0	12	1	1	7	1	5	1	3	7	3	6	0	10	16	2	1	1	2	2	0	1	1	2	1	2	0	1	2	2	2	2	0	0	2	1	0	0	2	1
0	12	1	1	8	0	0	0	0	3	1	0	5	7	9	2	0	1	1	0	1	2	1	1	0	2	0	0	0	0	1	2	1	1	1	2	0	1	0	2
1	12	1	0	3	0	0	1	2	2	2	3	3	5	10	2	1	1	1	1	0	1	1	1	0	2	0	0	1	0	0	1	0	1	0	1	0	1	0	1
0	12	1	0	4	0	0	1	4	1	0	0	1	10	2	2	0	0	2	0	0	2	0	2	0	2	0	0	2	0	1	2	0	0	2	2	0	1	0	2
0	12	1	1	9	1	10	1	7	5	1	5	1	8	12	2	2	0	1	0	1	1	1	2	1	2	0	2	2	0	2	2	0	0	1	1	0	0	0	1
1	11	1	1	7	1	6	1	7	4	1	4	4	9	13	2	1	2	2	1	0	2	1	2	1	2	0	1	1	1	0	2	0	2	1	1	0	1	0	2
0	12	1	1	9	1	5	1	10	0	0	1	4	8	5	2	0	0	1	0	0	2	0	1	0	0	0	0	1	0	0	2	0	0	2	1	0	1	0	2
0	11	1	1	7	0	0	1	5	3	1	4	2	8	10	2	1	0	2	0	0	1	0	0	1	2	0	0	1	1	2	2	0	0	2	1	0	1	1	2
0	12	1	0	5	0	0	1	2	0	2	3	0	6	5	1	0	0	2	0	0	0	0	0	0	2	0	0	2	0	0	2	0	0	1	1	0	0	0	0
0	12	1	1	6	1	5	0	0	6	2	5	3	8	16	2	1	0	2	1	0	1	1	1	2	2	0	2	0	1	2	2	0	1	1	2	0	0	1	1
1	13	1	1	8	1	5	1	3	0	2	4	2	7	8	1	1	0	2	1	0	1	0	2	0	1	0	0	1	1	0	1	0	0	1	1	0	0	0	1
0	13	1	1	10	1	6	1	10	9	5	8	4	8	26	2	1	2	1	2	2	0	2	2	1	2	0	2	1	2	2	2	1	0	1	0	0	1	1	0
0	13	1	1	10	1	2	1	10	4	2	2	4	10	12	2	0	1	2	2	2	2	1	2	0	2	0	1	1	0	0	2	0	0	2	1	0	1	1	1
1	12	1	1	10	1	10	1	8	3	8	8	3	4	22	1	2	0	0	2	1	0	1	0	0	2	0	0	2	2	1	2	2	0	1	0	2	2	1	0
1	14	1	1	7	1	7	1	7	2	2	3	3	10	10	2	1	0	2	0	0	1	1	2	1	1	0	0	1	1	1	2	1	0	2	2	0	1	0	2
1	12	1	1	10	0	0	1	4	3	2	6	0	7	11	1	2	1	2	0	0	1	2	1	1	2	1	0	2	1	0	2	0	0	1	1	0	0	0	1
1	12	1	1	3	0	0	0	0	1	3	1	0	9	5	2	0	0	2	1	0	2	0	2	0	2	0	0	2	0	1	2	1	0	1	1	1	0	0	2
0	11	1	1	5	0	6	1	4	6	4	2	3	9	15	2	0	1	1	2	1	0	2	2	0	1	0	1	2	0	1	2	0	0	2	1	0	1	1	1
1	11	1	1	5	1	9	0	0	6	1	5	3	7	15	1	1	1	2	0	1	1	2	0	2	2	0	0	1	1	2	2	0	0	2	2	0	1	1	1
0	13	1	1	10	0	0	1	3	5	2	6	2	6	15	0	2	0	1	1	0	1	1	1	0	2	0	2	1	2	1	2	0	0	2	1	0	1	1	1
0	13	1	1	9	0	0	1	2	3	2	7	0	4	12	0	1	1	1	1	0	1	1	1	2	2	0	0	2	2	1	1	0	0	1	1	0	0	0	1
0	12	1	0	1	1	3	1	2	0	1	3	3	6	7	1	0	0	1	0	0	1	0	0	0	1	0	0	1	0	0	2	0	0	2	0	0	1	0	1
1	12	1	0	0	0	0	1	1	1	0	3	1	7	5	1	0	0	1	0	0	2	0	1	1	2	0	0	1	0	0	2	0	0	2	1	0	0	1	1
1	12	1	1	6	1	7	1	8	3	3	4	2	10	12	2	1	0	2	1	0	0	1	2	0	2	0	1	1	1	1	2	0	0	2	1	0	1	0	1
1	13	1	0	4	0	0	1	3	6	3	5	5	6	19	2	0	0	1	2	2	1	2	1	1	2	0	1	1	1	2	1	0	1	1	1	0	1	1	0
1	12	1	1	8	1	5	0	0	0	1	2	1	6	4	1	1	0	2	0	0	1	0	0	0	2	0	0	2	0	0	1	0	0	2	2	0	1	0	1
1	12	1	1	6	1	4	0	3	5	3	5	2	8	15	1	0	1	2	0	0	1	1	2	1	2	1	1	1	0	1	2	1	1	1	0	0	0	1	0
1	12	1	0	0	0	0	1	3	3	1	1	1	9	6	2	0	1	2	0	0	2	1	1	0	1	0	0	2	0	1	2	1	0	2	2	0	0	0	1
1	13	1	1	7	0	0	0	0	0	4	0	0	10	4	2	0	0	2	1	0	0	0	2	0	2	0	0	2	0	0	2	1	0	2	2	0	0	0	2
0	13	1	1	6	0	0	0	0	0	2	4	1	7	7	2	1	0	1	0	0	0	0	2	0	2	0	0	1	0	0	1	0	0	1	1	0	0	0	0
0	14	1	1	10	1	8	0	0	3	4	8	1	4	16	0	2	0	2	0	0	0	1	1	0	2	0	1	2	2	1	1	1	0	0	0	1	1	0	0
1	13	1	1	3	0	0	0	0	4	1	2	0	7	7	1	0	0	1	0	0	1	2	1	0	2	0	0	2	1	2	2	0	0	2	2	0	0	0	1
1	12	1	1	5	1	1	0	4	5	4	5	4	5	18	2	1	0	0	0	2	1	2	1	1	2	1	1	1	1	1	2	2	0	0	1	0	1	1	1
1	12	1	1	2	1	3	0	1	9	1	1	2	8	13	1	0	2	2	1	1	2	1	2	0	2	0	2	1	0	2	2	0	0	1	1	0	0	2	2
0	12	1	1	10	1	10	0	0	4	8	9	0	2	21	1	2	1	0	2	0	0	2	0	2	2	2	1	2	2	0	1	2	0	0	1	0	0	0	0
1	12	1	1	1	0	0	0	0	1	1	0	2	7	4	1	0	0	1	1	0	2	0	1	0	1	0	0	1	0	1	2	0	0	2	2	0	0	0	2
1	12	1	1	6	0	0	1	9	3	6	4	5	9	18	2	2	2	2	1	2	0	0	2	0	2	0	0	1	1	1	2	2	0	1	1	1	2	0	2
1	12	1	1	7	1	8	1	9	5	6	7	1	6	19	1	2	1	0	2	0	1	1	2	2	2	1	1	2	2	1	2	1	0	1	1	1	1	1	2
1	12	1	1	6	1	8	1	7	5	3	3	1	8	12	2	2	1	1	1	0	1	1	2	1	2	0	1	2	0	1	2	0	0	1	2	1	1	1	2
1	12	1	1	6	1	10	1	10	3	1	6	1	8	11	2	2	1	2	0	1	1	2	2	0	2	0	0	2	0	0	2	0	0	0	0	0	0	0	0
1	12	1	0	4	1	5	1	2	0	3	4	1	7	8	1	0	0	2	0	0	1	0	1	1	2	0	0	2	1	0	2	1	1	1	1	1	0	0	1
0	10	1	0	0	0	0	0	0	1	1	0	0	7	2	0	0	0	2	1	0	2	0	1	0	2	0	0	2	0	0	2	0	0	2	2	0	0	1	2
1	11	1	0	4	0	2	1	6	3	1	0	1	8	5	2	0	1	2	1	0	2	1	1	0	2	0	0	2	0	1	2	0	0	1	2	0	1	0	2
1	11	1	1	4	1	2	1	2	6	4	3	7	10	20	2	0	1	2	2	2	2	2	2	2	1	1	1	0	0	1	2	1	2	2	1	0	0	1	2
1	11	1	1	2	1	2	1	3	2	2	4	2	6	10	1	1	0	1	1	1	1	0	1	1	2	0	1	2	1	0	2	0	0	1	2	0	1	1	1
0	11	1	1	10	1	10	1	10	7	5	6	5	7	23	1	2	0	0	2	2	0	2	2	2	2	1	2	0	2	2	2	0	1	2	2	0	0	1	2
0	11	1	1	10	1	10	1	10	1	3	4	0	8	8	0	1	0	2	0	0	0	1	2	1	2	0	0	2	1	0	2	1	0	2	2	0	0	0	1
0	11	1	0	0	0	0	0	0	0	2	4	4	0	10	0	0	0	0	0	0	0	0	0	0	0	0	0	0	0	0	0	0	0	0	0	0	0	0	0
0	11	1	1	5	1	9	1	6	3	2	3	1	10	9	2	0	0	2	1	0	1	1	2	0	2	0	2	2	1	0	2	0	1	2	2	0	0	0	0
1	11	1	1	10	1	7	1	8	0	2	2	0	7	4	1	0	0	1	0	0	2	0	2	0	2	0	0	2	1	0	2	1	0	1	2	1	0	0	1
1	10	1	0	5	0	5	0	4	5	1	5	4	8	15	2	0	1	1	0	1	2	1	1	1	2	0	1	0	0	1	2	1	0	2	0	0	1	1	0
0	13	1	1	5	1	4	0	0	2	1	2	2	10	7	2	1	0	2	1	0	2	0	2	1	2	0	1	2	0	1	2	0	0	2	2	0	2	0	2
1	13	1	1	10	1	8	1	3	1	2	3	0	7	6	2	0	0	1	0	0	1	0	1	1	2	1	0	2	0	1	2	0	0	1	1	0	0	0	1
1	13	1	1	10	1	8	1	3	1	2	3	0	7	6	2	0	0	1	0	0	1	0	1	1	2	1	0	2	0	1	2	0	0	1	1	0	0	0	1
0	12	1	1	7	0	0	1	9	6	7	10	2	5	25	1	2	1	0	0	0	0	1	1	2	2	1	0	1	2	2	2	2	0	1	0	2	1	2	0
0	12	1	1	6	1	8	1	3	7	2	7	2	7	18	2	2	1	0	0	1	1	2	1	2	2	0	1	2	1	1	2	1	1	2	1	0	0	2	1
0	13	1	1	3	1	6	1	6	3	2	3	3	8	11	0	2	1	2	0	0	1	0	2	0	2	0	0	1	0	1	2	0	0	2	1	1	2	1	2
0	13	1	1	8	0	5	1	7	7	2	8	4	8	21	1	2	0	2	1	0	2	2	2	1	1	1	1	1	2	2	1	0	1	2	1	0	1	2	0
1	13	1	0	1	0	0	0	0	3	3	5	0	7	11	2	1	1	2	1	0	1	2	0	0	2	1	0	2	1	0	2	0	0	1	0	0	0	0	1
0	13	1	1	8	1	10	1	1	3	3	8	0	6	14	1	2	0	1	1	0	1	1	1	0	2	0	2	2	2	0	2	0	0	1	0	1	0	0	0
0	13	1	1	9	0	0	1	5	5	5	10	4	7	24	0	2	0	2	2	1	1	1	2	2	2	2	2	1	2	0	2	0	1	1	0	0	1	2	0
1	13	1	1	7	0	0	1	6	1	1	3	3	9	8	2	1	0	1	0	1	1	0	2	0	2	0	0	1	1	1	2	0	0	2	1	0	1	0	2
0	15	1	1	10	1	10	1	10	8	7	7	4	4	26	0	2	2	1	2	0	0	1	1	0	1	1	2	2	1	1	1	2	2	1	0	0	1	2	0
0	13	1	1	7	1	8	0	0	3	3	4	3	6	13	2	1	1	1	2	0	2	2	2	1	2	0	0	1	1	0	1	0	2	0	2	1	0	0	1
0	13	1	1	8	0	0	1	3	5	5	4	1	7	15	2	1	1	1	2	0	1	2	2	2	2	1	1	1	0	1	1	1	0	1	2	0	0	0	1
0	13	1	1	9	0	0	1	9	5	2	3	0	6	10	2	1	1	1	1	0	1	2	1	0	2	0	1	2	1	1	1	0	0	1	2	0	0	0	1
0	13	1	1	3	1	4	0	0	2	1	0	0	9	3	2	0	0	2	1	0	2	0	2	0	2	0	0	2	0	0	2	0	0	1	2	0	0	2	2
1	14	1	1	4	0	2	0	2	1	1	1	3	9	6	2	0	1	2	1	0	2	0	1	0	2	0	0	1	0	0	2	0	1	2	1	0	1	0	2
1	13	1	1	4	0	0	0	0	1	1	0	5	8	7	2	0	0	1	0	1	1	0	2	0	2	0	0	1	0	1	2	0	2	1	2	0	1	0	2
1	13	1	0	10	1	5	1	3	4	4	5	1	7	14	1	1	0	2	0	0	0	2	2	0	2	0	0	2	1	2	0	1	0	2	0	1	1	0	1
0	12	1	1	6	1	8	1	10	2	3	2	0	8	7	1	2	0	2	1	0	1	0	2	0	2	0	0	2	0	0	2	0	0	1	2	1	0	2	2
0	13	1	1	3	0	1	0	1	4	3	0	4	9	11	1	0	1	2	0	0	1	1	2	0	0	0	1	2	0	0	2	2	0	2	2	0	2	1	2
1	13	1	1	6	1	1	0	10	1	1	3	0	6	5	1	0	0	2	0	0	1	1	1	0	2	0	0	2	1	0	1	0	0	1	1	0	0	0	1
0	13	1	1	10	1	10	1	1	10	6	7	3	8	26	1	2	2	1	2	0	1	2	2	2	1	2	2	2	2	2	2	1	0	2	2	0	2	2	1
1	12	1	0	0	0	0	1	2	3	3	7	3	6	16	1	2	0	1	1	0	1	1	1	2	2	0	0	2	1	1	2	1	1	1	1	0	2	1	1
1	13	1	0	4	0	0	1	6	4	1	5	2	5	12	1	2	1	1	0	0	1	0	1	0	2	0	0	1	0	1	1	0	0	1	0	0	1	2	1
0	12	1	1	10	1	10	1	10	0	3	5	3	0	11	0	0	0	0	0	0	0	0	0	0	1	1	0	0	1	0	0	0	0	0	0	0	0	0	0
1	12	1	1	5	0	0	1	1	0	1	2	0	5	3	1	0	0	1	0	0	1	0	1	0	2	0	0	2	0	0	1	0	0	1	1	0	0	0	1
1	13	1	1	7	1	4	1	6	3	2	3	3	7	11	2	1	0	1	2	0	2	1	2	1	1	0	1	1	0	1	2	0	1	0	2	0	0	0	1
1	12	1	0	6	1	4	1	2	1	3	2	0	9	6	2	0	0	1	1	0	2	0	2	1	2	0	1	2	0	0	2	2	0	2	1	0	0	0	2
1	12	1	1	7	0	2	1	8	2	1	1	1	8	5	2	1	0	1	0	0	1	0	2	0	2	0	0	2	0	1	2	0	0	1	2	0	1	1	2
1	12	1	0	0	0	0	0	0	0	0	0	2	10	2	2	0	0	2	0	0	2	0	2	0	2	0	0	2	0	0	2	0	0	2	2	0	2	0	2
1	11	1	0	0	0	0	0	0	0	0	0	2	10	2	2	0	0	2	0	2	2	0	2	0	2	0	0	2	0	0	2	0	0	2	2	0	0	0	2
0	12	1	1	6	1	3	1	2	4	2	5	1	9	12	1	1	1	2	1	0	1	0	2	1	2	0	1	2	1	1	2	0	1	2	1	0	0	1	1
0	12	1	1	6	1	7	1	3	6	4	5	4	9	19	1	1	1	2	1	0	1	1	2	1	2	1	2	1	1	0	2	1	2	2	1	0	1	2	1
1	12	1	0	0	0	0	0	0	2	1	2	0	5	5	2	0	0	0	0	0	1	0	1	0	2	0	1	2	1	1	1	0	0	1	2	0	0	0	1
1	11	1	1	4	1	3	0	0	1	2	5	0	6	8	1	1	0	1	1	0	1	1	1	0	2	0	0	2	1	0	2	0	0	1	0	0	0	0	1
0	11	1	0	7	0	1	1	1	1	1	1	1	6	4	1	1	0	1	0	0	1	1	1	0	2	0	0	2	0	0	2	0	0	1	2	0	1	0	2
1	11	1	1	7	0	0	0	0	2	1	1	1	7	5	2	0	0	1	1	0	2	1	1	0	2	0	1	1	0	0	2	0	0	1	2	0	0	0	1
1	11	1	0	1	0	0	0	0	0	1	4	4	1	9	1	0	0	0	0	0	1	0	0	0	0	0	0	0	0	0	0	0	0	0	0	0	0	0	0
0	11	1	1	7	0	0	0	0	5	4	4	2	7	15	2	1	0	1	1	1	1	2	2	1	2	0	0	2	1	2	2	1	1	0	2	1	0	1	1
0	10	1	1	5	1	2	0	0	3	5	4	1	7	13	1	0	1	1	2	0	1	1	2	1	2	1	0	1	0	1	2	0	0	1	0	1	0	0	1
1	11	1	0	5	0	0	1	9	2	0	4	1	10	7	2	2	2	2	0	0	2	0	2	1	2	0	0	2	0	0	2	0	0	2	1	0	1	0	2
1	11	1	1	7	1	5	0	0	0	1	3	1	6	5	1	0	0	1	0	0	1	0	1	0	2	0	0	1	0	0	2	0	0	1	0	0	0	0	1
1	11	1	0	2	0	2	0	2	1	2	1	0	7	4	2	0	1	1	0	0	0	0	1	0	2	0	0	2	0	0	2	0	0	1	1	0	0	0	2
0	10	1	0	4	1	1	1	3	1	1	0	5	7	7	2	0	0	1	0	1	1	0	1	0	1	0	0	1	0	0	2	0	1	1	2	0	1	1	2
1	11	1	0	0	0	0	0	0	2	1	2	0	10	5	2	0	1	2	0	0	2	0	2	0	2	0	0	2	0	1	2	0	0	2	2	1	0	0	0
1	10	1	0	7	0	0	1	3	2	1	2	0	8	5	2	0	0	2	0	0	1	0	1	0	2	0	0	2	1	1	2	0	0	1	2	0	0	1	1
0	11	1	1	4	1	5	1	5	9	1	7	3	10	20	2	1	1	2	1	0	2	2	2	1	2	0	2	1	2	2	2	0	1	2	0	0	1	2	1
0	11	1	1	7	1	6	0	0	0	1	3	0	7	4	2	0	0	1	0	0	1	0	1	0	2	0	0	2	0	0	2	0	0	1	1	0	0	0	0
1	11	1	0	0	0	0	1	1	1	0	1	2	5	4	2	0	1	0	0	0	2	0	1	0	0	0	0	2	0	0	1	0	0	1	2	0	0	0	1
1	11	1	1	6	0	0	1	4	2	1	2	4	7	9	2	1	0	1	1	1	2	1	1	0	2	0	1	2	0	0	2	0	2	1	1	0	1	0	2
0	11	1	0	0	0	0	1	2	9	4	7	3	10	23	2	1	1	2	1	1	2	2	2	2	2	1	2	1	2	2	2	2	1	2	1	0	0	2	1
1	13	1	0	4	0	2	0	3	0	0	0	1	10	1	2	0	0	2	0	0	2	0	2	0	2	0	0	2	0	0	2	0	0	2	2	0	1	0	2
1	11	1	1	3	0	0	1	2	4	6	5	1	9	16	2	1	0	1	2	0	1	2	2	1	2	0	1	2	1	0	2	2	1	2	1	1	0	1	1
0	11	1	1	5	1	7	1	2	6	2	2	2	10	12	2	1	1	2	1	0	2	1	2	1	2	0	1	1	0	1	2	1	1	2	2	0	0	2	2
1	11	1	1	7	0	0	0	0	0	2	1	5	8	8	1	0	0	2	0	0	2	0	1	0	2	0	0	0	1	0	2	2	2	2	2	0	1	0	2
1	12	1	0	0	0	0	0	0	4	1	6	2	6	13	1	2	0	1	1	0	2	2	1	2	2	0	1	1	0	1	2	0	0	1	1	0	1	0	1
1	11	1	0	5	0	0	1	1	4	1	5	0	4	10	1	2	0	1	0	0	1	2	1	0	2	0	0	2	1	2	0	0	0	1	1	0	0	0	1
0	12	1	1	3	0	0	0	0	7	0	1	1	7	9	2	0	2	1	0	0	2	2	1	0	2	0	1	1	0	2	2	0	0	1	2	0	0	0	1
1	11	1	1	8	1	10	1	2	4	2	2	2	7	10	0	2	2	2	2	0	2	0	2	0	2	0	0	2	0	2	2	0	1	1	2	0	1	0	2
1	11	1	0	0	0	0	1	10	6	6	10	5	6	27	1	2	0	1	2	2	1	2	2	2	2	0	1	1	2	2	2	1	1	0	0	2	1	1	0
1	12	1	0	3	0	0	1	1	2	2	4	1	8	9	1	1	0	2	1	0	1	0	2	0	2	0	0	2	1	0	2	0	0	1	1	0	1	2	1
1	12	1	1	5	0	0	1	8	4	2	4	1	7	11	2	1	0	1	2	1	2	2	1	1	2	0	0	2	1	1	2	0	0	1	1	0	0	1	2
1	12	1	1	7	1	9	1	5	6	4	3	6	7	19	2	0	0	1	1	1	1	2	1	0	2	0	1	1	1	2	2	2	2	1	1	0	2	1	1
0	12	1	1	1	0	0	1	5	4	1	4	1	10	10	2	1	0	2	1	0	2	2	2	1	2	0	0	1	0	2	2	0	0	2	1	0	0	0	1
0	11	1	0	6	1	3	0	0	3	1	0	1	9	5	2	0	1	2	1	0	2	0	2	0	2	0	1	2	0	1	2	0	0	1	2	0	1	0	2
0	12	1	0	3	0	2	1	6	2	2	3	0	10	7	2	1	1	2	1	0	1	0	2	0	2	0	0	2	0	1	2	0	0	2	1	0	0	0	1
1	12	1	0	3	0	0	1	4	3	5	7	1	7	16	1	2	1	1	1	0	0	1	1	2	2	1	0	2	1	1	2	0	0	2	0	1	1	0	2
1	12	1	1	0	0	0	1	2	0	2	2	0	6	4	1	0	0	1	0	0	1	0	1	0	2	0	0	2	0	0	2	0	0	1	1	1	0	0	1
1	11	1	1	9	1	8	1	6	6	5	2	3	7	16	1	0	0	2	1	0	0	1	1	2	2	0	2	1	0	2	2	2	2	1	2	0	0	1	2
1	11	1	1	10	0	0	1	3	3	4	5	4	8	16	2	0	1	1	2	1	1	0	2	0	1	1	0	1	1	1	2	0	0	1	0	0	1	1	0
1	11	1	1	10	1	8	1	2	2	4	5	0	10	11	2	1	1	2	1	0	1	0	2	1	2	0	0	2	1	1	2	1	0	2	1	1	0	0	1
0	11	1	0	4	0	2	0	0	0	0	2	0	9	2	2	1	0	1	0	0	2	0	2	1	2	0	0	2	0	0	2	0	0	2	2	0	0	0	2
1	11	1	1	8	1	5	1	2	2	1	1	1	4	5	1	0	1	1	0	0	1	1	1	0	2	0	0	1	0	0	1	0	0	0	2	0	0	0	1
0	11	1	0	2	0	1	0	0	1	1	2	1	7	5	2	0	0	1	0	0	1	0	1	0	2	0	0	1	0	1	2	0	0	1	1	0	0	0	1
0	11	1	1	3	1	5	1	4	3	3	4	3	9	13	2	1	1	1	1	0	1	0	2	1	2	1	1	2	1	0	2	0	1	2	2	0	2	1	1
0	11	1	1	10	1	9	1	8	6	4	4	2	6	16	1	1	0	2	1	0	2	1	0	1	2	1	1	2	1	2	2	2	1	1	2	0	1	2	1
0	11	1	0	2	0	0	1	8	8	5	4	3	10	20	2	2	1	2	1	0	1	2	2	1	2	1	2	1	1	1	2	2	1	2	2	0	1	2	2
0	11	1	0	0	1	8	1	10	8	6	7	3	9	24	1	2	0	2	2	1	0	2	2	1	2	0	2	1	0	2	2	2	1	2	0	0	0	2	0
0	11	1	1	8	0	0	1	9	6	4	2	1	8	13	1	1	0	2	2	0	1	1	2	1	2	0	2	1	0	1	2	1	0	1	2	0	0	2	2
1	11	1	0	7	0	7	1	6	3	2	2	1	8	8	2	1	0	1	0	1	1	1	2	0	2	0	1	2	1	0	1	1	0	2	2	0	0	1	2
1	11	1	1	5	1	5	1	4	3	1	2	0	7	6	2	0	0	1	0	0	1	1	1	0	2	0	0	2	0	0	2	0	0	1	1	0	0	2	1
1	10	1	1	9	0	1	1	5	3	3	3	2	6	11	1	2	1	1	0	0	1	1	1	0	1	1	0	1	0	1	2	1	0	1	2	0	0	0	1
0	11	1	1	5	1	4	1	3	5	3	2	2	7	12	1	1	2	1	2	0	1	1	1	0	2	0	1	1	0	0	2	0	0	2	1	0	1	1	2
0	11	1	0	0	0	0	0	0	0	1	3	4	8	8	2	1	0	1	0	1	1	0	2	0	2	0	0	0	0	0	2	0	0	1	1	0	1	0	1
0	11	1	0	3	0	2	1	2	0	0	2	2	10	4	2	0	0	2	0	2	2	0	2	0	2	0	0	2	0	0	2	0	0	2	0	0	0	0	2
0	11	1	0	0	0	0	0	0	3	0	2	1	10	6	2	1	0	2	0	1	2	1	2	1	2	0	0	2	0	1	2	0	0	2	2	0	0	1	2
1	10	1	0	4	0	0	0	0	0	1	1	3	8	5	2	0	0	1	0	0	1	0	2	0	2	0	0	1	0	0	2	0	2	1	2	0	0	0	1
0	11	1	0	0	0	0	0	0	4	0	2	0	10	6	2	1	0	2	0	0	2	2	2	0	2	0	0	2	0	1	2	0	0	2	2	0	0	1	1
1	11	1	0	0	0	0	0	0	1	1	4	1	6	7	1	2	1	1	0	0	1	0	2	0	2	0	0	1	0	0	1	0	0	1	1	0	0	0	1
0	11	1	1	2	0	0	0	0	6	4	4	3	9	17	2	2	1	1	1	0	1	1	2	2	2	0	1	1	0	2	2	2	1	2	2	0	1	1	2
0	11	1	1	0	0	0	0	0	0	0	3	3	8	6	1	0	0	1	0	0	2	0	2	0	1	0	0	1	0	0	2	0	0	2	1	0	1	0	0
0	10	1	1	5	1	4	1	4	2	2	4	1	7	9	2	0	0	1	1	0	1	0	1	0	2	0	0	1	1	1	2	0	0	1	1	0	0	1	0
1	11	1	1	2	0	0	0	0	0	1	2	3	4	6	0	0	0	1	0	0	1	0	1	0	1	0	0	1	0	0	1	0	0	1	1	0	1	0	1
0	10	1	0	0	0	0	0	0	3	1	1	4	8	9	2	0	0	1	1	0	2	0	2	0	0	0	1	1	0	1	2	0	0	1	2	0	1	1	1
0	11	1	0	0	0	0	0	0	1	0	1	0	8	2	2	0	1	2	0	0	2	0	1	0	2	0	0	2	0	0	2	0	0	1	1	0	0	0	2
0	11	1	0	0	0	0	1	1	0	1	5	2	10	8	2	2	0	2	1	0	2	0	2	0	2	0	0	2	1	0	2	0	0	2	0	0	2	0	2
1	10	1	1	7	1	6	1	4	5	4	4	3	4	16	1	0	1	2	1	1	1	2	0	0	1	0	0	1	1	2	1	2	0	0	1	0	0	0	0
0	11	1	0	0	0	0	0	0	4	2	4	1	8	11	2	1	0	1	0	0	1	1	2	0	2	0	1	1	1	1	1	1	0	2	1	0	0	1	1
0	11	1	0	5	0	2	0	0	1	1	2	5	5	9	1	0	0	1	0	1	1	0	1	0	0	0	0	1	0	1	1	0	0	1	1	0	1	0	1
0	11	1	1	4	1	3	1	2	1	2	2	1	10	6	2	0	0	2	0	0	1	1	2	1	2	0	0	1	0	0	2	1	0	2	2	0	0	0	1
0	11	1	0	0	1	1	0	0	0	0	0	0	10	0	2	0	0	2	0	0	2	0	2	0	2	0	0	2	0	0	2	0	0	2	2	0	0	0	2
0	11	1	0	0	1	6	1	7	9	2	6	1	7	18	2	1	1	1	1	1	1	2	1	2	2	0	2	2	1	2	2	0	0	1	1	0	0	2	1
1	11	1	1	7	0	0	0	0	1	2	2	1	9	6	2	1	0	2	1	0	2	0	1	1	2	1	0	2	0	1	2	0	1	2	2	0	0	0	2
0	11	1	0	0	0	0	1	3	9	4	3	1	10	17	2	1	2	2	2	0	2	2	2	2	2	0	2	2	0	1	2	2	0	2	2	0	1	2	2
0	11	1	1	1	0	0	0	0	0	0	2	1	10	3	2	1	0	2	0	0	2	0	2	0	2	0	0	2	0	0	2	0	0	2	1	0	1	0	2
1	11	1	0	0	0	0	0	0	2	0	0	0	10	2	2	0	0	2	0	0	2	0	2	0	2	0	1	2	0	1	2	0	0	2	2	0	0	0	2
1	11	1	1	3	1	5	1	2	2	2	4	2	8	10	1	0	1	2	0	0	1	0	2	0	2	0	1	1	1	0	2	1	0	1	1	0	1	0	0
0	11	1	1	10	1	10	0	0	2	2	2	0	5	6	1	0	1	1	2	0	2	1	2	0	2	0	0	2	2	0	0	0	0	1	2	0	0	0	2
0	11	1	0	0	1	1	1	2	5	4	3	2	9	14	2	0	2	2	1	0	1	2	2	2	2	0	0	2	0	0	2	2	1	1	2	0	1	1	1
1	11	1	0	10	1	10	1	10	3	1	6	1	6	11	1	1	1	2	0	0	1	1	0	0	2	0	0	1	1	1	2	0	0	1	0	0	0	0	0
1	10	1	1	5	0	0	0	0	1	1	0	0	10	2	2	0	1	2	1	0	2	0	2	0	2	0	0	2	0	0	2	0	0	2	2	0	0	0	2
1	11	1	1	10	1	9	1	10	4	0	3	3	8	10	0	2	0	2	0	0	2	2	2	0	2	0	0	2	0	0	2	0	2	2	2	0	1	2	1
0	11	1	0	5	1	8	0	0	0	2	4	2	7	8	1	0	0	1	0	0	0	0	2	1	2	0	0	2	1	0	2	0	0	1	0	0	2	0	2
0	11	1	1	5	0	6	1	5	0	0	0	0	10	0	2	0	0	2	0	0	2	0	2	0	2	0	0	2	0	0	2	0	0	2	2	0	0	0	2
0	11	1	1	6	0	0	1	3	4	2	3	0	8	9	2	0	1	2	1	0	1	1	1	1	2	0	1	2	0	0	2	0	0	1	1	0	0	1	1
1	11	1	1	7	0	0	0	0	2	1	3	2	4	8	1	0	1	1	0	1	1	0	1	0	2	0	0	1	1	0	1	0	0	0	1	0	0	1	1
1	11	1	0	2	0	0	0	0	3	2	6	1	6	12	1	0	0	2	0	0	1	2	1	1	2	0	0	1	2	1	1	1	0	1	1	0	0	0	0
1	11	1	0	6	1	6	1	4	1	2	2	0	9	5	2	0	0	2	1	0	1	0	2	0	2	0	0	2	0	1	2	0	0	1	0	0	0	0	2
0	11	1	1	7	0	1	1	4	0	0	2	0	10	2	2	1	0	2	0	0	2	0	2	0	2	0	0	2	0	0	2	0	0	2	1	0	0	0	2
1	11	1	1	7	0	0	1	7	2	2	1	0	10	5	2	1	1	2	1	0	1	0	2	0	2	0	0	2	0	0	2	0	0	2	2	0	0	1	2
0	11	1	0	6	1	6	0	0	4	2	3	0	10	9	2	2	0	2	2	0	2	1	2	1	2	0	1	2	0	1	2	0	0	2	2	0	0	1	2
0	10	1	0	2	1	2	0	0	5	3	0	7	9	15	2	0	0	2	1	0	2	2	1	0	0	0	2	0	0	0	2	2	2	2	2	0	1	1	2
1	10	1	1	7	1	4	1	2	2	5	6	1	7	14	1	2	0	1	1	0	1	1	2	1	2	1	0	2	2	1	2	1	1	1	2	1	0	0	1
1	11	1	1	8	1	6	0	2	8	5	6	1	9	20	1	2	1	2	1	0	1	2	2	1	2	2	1	1	1	2	2	1	0	2	1	0	0	2	1
0	11	1	1	5	0	0	0	0	4	2	4	0	9	10	2	1	1	1	2	0	2	0	2	0	2	0	1	2	1	1	2	0	0	2	1	0	0	1	1
1	10	1	1	3	0	0	0	0	1	1	1	1	6	4	0	0	0	0	0	0	1	0	2	0	2	0	0	2	1	0	2	0	0	2	2	0	1	1	2
1	10	1	0	0	0	0	0	0	0	1	5	1	8	7	2	1	0	1	0	0	1	0	2	0	2	0	0	1	0	0	2	0	0	1	0	0	0	0	0
1	11	1	0	0	0	0	1	1	3	2	2	1	10	8	2	0	2	2	0	0	1	0	2	0	2	0	0	2	1	1	2	1	1	2	1	0	0	0	2
0	11	1	1	8	1	7	1	9	5	2	4	2	10	13	2	2	1	2	1	0	1	2	2	2	2	0	1	1	0	1	2	0	0	2	2	0	1	0	2
0	11	1	1	1	0	0	0	0	5	3	7	1	7	16	2	2	1	1	1	0	1	1	1	2	2	0	1	2	1	1	2	1	1	1	1	0	0	1	1
0	10	1	1	2	1	2	0	0	0	1	1	0	9	2	2	0	0	2	0	0	1	0	2	0	2	0	0	2	0	0	2	0	0	1	2	0	0	0	1
0	11	1	1	6	1	3	0	0	6	2	2	0	8	10	1	1	0	2	1	0	1	2	2	0	2	0	1	2	0	2	2	0	0	1	2	0	0	1	1
0	11	1	0	3	0	0	1	1	6	4	4	2	8	16	2	1	0	2	1	1	0	2	1	0	2	0	2	2	1	0	2	1	0	1	1	0	1	2	1
0	10	1	0	0	0	0	1	8	2	1	3	2	6	8	1	2	0	1	0	0	1	2	2	0	2	0	0	0	0	0	0	0	0	2	2	0	0	0	1
1	11	1	0	2	1	4	0	0	1	2	2	0	10	5	2	1	0	2	1	0	2	0	2	1	2	0	0	2	0	0	2	1	0	2	2	0	0	1	2
0	11	1	0	1	0	0	0	0	0	1	2	1	5	4	1	1	0	0	0	0	2	0	1	1	2	1	0	2	0	0	2	0	0	1	2	0	1	0	2
0	11	1	1	8	1	6	1	4	4	2	2	0	10	8	2	1	1	2	1	0	1	1	2	0	2	0	1	2	0	1	2	0	0	2	1	0	0	0	2
0	11	1	1	5	1	7	1	6	4	2	2	4	5	12	1	0	0	1	0	0	0	2	0	1	0	0	2	1	0	0	2	0	1	1	1	0	0	0	2
0	11	1	0	0	0	10	1	5	1	1	1	1	10	4	2	0	0	2	0	0	1	0	2	0	2	0	0	1	0	1	2	0	0	2	1	0	0	0	2
1	11	1	1	1	0	0	0	0	0	1	0	3	9	4	2	0	0	1	0	0	1	0	2	0	0	0	0	1	0	0	2	0	0	2	2	0	0	0	2
1	10	1	1	3	1	5	1	2	1	1	2	0	10	4	2	1	1	2	0	0	1	0	2	0	2	0	0	2	0	0	2	0	0	2	2	0	0	0	1
1	11	1	1	4	0	0	0	0	1	1	1	1	4	4	1	0	0	1	0	0	1	0	0	0	1	0	0	2	0	1	2	0	0	0	2	0	0	0	1
1	11	1	1	10	1	6	1	1	0	6	3	0	7	9	1	0	0	2	0	0	0	0	1	0	2	1	0	2	0	0	2	1	0	1	1	2	0	0	0
0	11	1	0	4	1	10	1	10	5	2	5	4	5	16	1	0	2	2	0	1	1	1	0	0	0	0	1	1	1	1	2	1	0	0	0	0	0	0	0
0	10	1	1	5	1	1	0	0	1	1	2	3	4	7	1	0	0	1	0	0	1	0	1	0	1	0	0	0	0	0	0	0	0	1	1	0	0	1	1
0	10	1	1	1	0	0	0	0	0	1	1	0	9	2	1	0	0	2	0	0	1	0	2	0	2	0	0	2	0	0	2	0	0	2	1	0	0	0	2
0	11	1	1	5	0	10	1	6	4	2	4	2	8	12	2	1	1	1	1	0	2	1	1	0	2	0	1	1	1	0	2	1	0	2	1	0	1	1	1
1	10	1	0	0	0	0	0	0	1	3	3	3	10	10	2	1	0	2	1	0	1	0	2	0	2	0	1	1	1	0	2	1	1	2	2	0	1	0	1
0	11	1	0	0	0	0	1	2	4	2	5	1	10	12	2	1	1	2	0	0	1	2	2	1	2	0	0	2	1	0	2	1	1	2	1	0	0	1	1
1	11	1	1	10	1	10	1	5	2	5	7	2	7	16	1	1	0	0	1	0	0	1	2	2	2	0	0	0	1	1	2	1	0	2	0	1	0	0	1
0	11	1	0	0	0	0	1	3	1	2	0	0	9	3	2	0	0	2	1	0	1	1	2	0	2	0	0	2	0	0	2	0	0	1	2	0	0	0	2
0	11	1	1	0	0	0	0	0	2	1	4	3	4	10	1	0	0	1	1	0	2	1	0	0	0	0	0	1	0	0	1	0	0	1	0	0	0	1	0
1	11	1	1	10	0	0	1	6	4	7	6	4	9	21	2	2	1	1	2	1	1	1	2	2	2	1	2	2	0	0	2	2	2	2	1	1	1	0	1
1	10	1	0	1	1	10	1	5	5	3	6	2	8	16	1	2	1	1	2	0	1	1	2	1	2	0	1	2	2	2	2	0	0	2	1	0	2	0	2
1	10	1	1	8	0	3	1	4	5	2	5	3	10	15	2	1	1	2	1	0	2	2	2	1	2	0	1	2	0	1	2	1	1	2	0	0	2	0	1
0	11	1	1	5	0	1	0	0	2	2	2	1	9	7	2	0	0	2	1	0	1	0	2	0	2	0	1	1	0	1	2	0	0	1	1	0	0	0	1
1	11	1	1	6	0	0	0	0	6	3	2	0	7	11	2	2	1	1	0	0	1	2	1	0	2	0	0	2	0	1	2	1	0	1	2	1	0	2	2
0	10	1	1	4	0	0	0	0	0	2	0	2	9	4	2	0	0	1	1	0	2	0	2	0	2	0	0	2	0	0	2	1	0	2	2	0	2	0	2
1	13	1	0	0	0	0	1	5	0	1	5	0	9	6	2	1	0	2	0	0	1	0	2	1	2	0	0	2	1	0	2	0	0	1	0	0	0	0	2
0	11	1	0	2	0	1	0	1	4	2	4	3	8	13	2	1	0	2	1	1	1	1	1	0	2	0	1	1	1	1	1	0	0	2	1	0	1	1	1
0	12	1	1	8	1	7	1	4	0	1	2	3	6	6	1	0	0	1	0	0	1	0	1	0	2	0	0	1	0	0	2	0	0	1	1	0	2	0	1
0	12	1	1	4	0	0	1	1	6	1	3	1	6	11	2	0	1	1	0	0	1	1	1	0	2	0	0	1	1	2	1	0	0	1	1	0	0	2	1
1	13	1	1	8	0	0	1	2	0	1	3	1	7	5	2	1	0	1	0	0	1	0	1	0	2	0	0	1	0	0	2	0	0	1	1	0	0	0	1
0	12	1	1	8	1	7	0	0	0	1	1	0	10	2	2	1	0	2	0	0	1	0	2	0	2	0	0	2	0	0	2	0	0	2	2	0	0	0	2
1	12	1	1	2	0	0	0	0	0	0	0	0	10	0	2	0	0	2	0	0	2	0	2	0	2	0	0	2	0	0	2	0	0	2	2	0	0	0	2
1	13	1	1	2	0	0	0	0	2	0	2	0	8	4	0	0	1	2	0	0	2	0	2	0	2	0	1	2	1	0	2	0	0	2	2	0	0	0	1
1	12	1	1	5	1	10	1	8	1	4	3	0	5	8	1	1	0	1	1	0	0	0	1	0	2	0	0	2	1	1	1	0	0	1	2	1	0	0	1
1	12	1	0	3	0	1	0	0	3	3	4	1	5	11	1	1	1	2	1	0	1	0	1	1	2	1	1	1	0	1	1	0	0	0	1	0	0	0	1
1	12	1	1	4	1	3	1	10	2	0	4	0	9	6	2	1	0	1	0	0	2	1	2	0	2	0	0	2	2	1	2	0	0	2	1	0	0	0	2
0	12	1	1	8	0	0	1	2	5	2	2	1	6	10	1	0	1	1	1	0	1	2	1	0	2	0	0	2	1	2	2	0	0	1	1	0	1	0	2
1	12	1	0	1	0	0	0	0	1	1	0	2	6	4	1	0	0	2	0	0	1	0	1	0	1	0	0	2	0	0	2	0	0	0	2	0	1	1	2
1	12	1	1	10	1	10	1	7	6	4	4	0	2	14	1	1	0	0	1	0	1	2	1	0	2	1	1	2	0	1	0	0	0	0	0	1	0	2	1
1	12	1	1	10	1	2	1	4	3	6	4	0	9	13	2	1	0	2	2	0	1	1	2	0	2	1	0	2	1	1	2	2	0	1	1	0	0	1	1
1	11	1	1	7	1	5	1	5	6	5	4	4	8	19	2	1	1	1	2	2	1	1	2	1	2	1	1	1	2	2	1	0	0	2	2	1	1	1	2
0	12	1	1	5	0	2	1	1	5	4	7	3	8	19	2	1	1	2	2	1	1	2	2	1	2	0	1	1	2	0	1	1	0	1	0	0	1	1	1
1	12	1	1	10	0	1	1	5	2	3	4	2	6	11	1	1	0	0	1	0	0	1	2	1	2	0	0	1	1	1	2	0	0	1	2	0	1	0	1
0	12	1	0	4	1	5	0	0	8	1	2	0	10	11	2	2	1	2	1	0	2	2	2	0	2	0	2	2	0	1	2	0	0	2	2	0	0	2	2
1	12	1	1	6	1	4	0	10	4	1	3	1	7	9	2	0	1	1	1	1	2	1	1	0	2	0	1	2	1	1	2	0	0	1	1	0	0	0	1
1	12	1	0	3	0	0	0	0	1	0	1	3	10	5	2	0	0	2	0	0	2	1	2	1	2	0	0	2	0	0	2	0	1	2	2	0	2	0	2
0	11	1	1	7	1	5	0	1	2	1	1	0	10	4	2	0	0	2	0	0	1	0	2	0	2	0	0	2	0	2	2	0	0	2	2	0	0	0	1
0	11	1	0	1	1	5	0	0	4	2	3	3	7	12	0	0	1	2	0	0	1	1	2	2	2	1	1	0	0	0	2	0	1	1	2	0	0	1	1
1	12	1	1	8	0	0	0	0	1	0	0	1	10	2	2	0	0	2	0	0	2	1	2	0	2	0	0	2	0	0	2	0	1	2	2	0	0	0	2
0	12	1	1	5	1	8	1	3	4	2	7	1	8	14	2	1	1	1	1	0	1	1	2	1	2	0	0	2	2	1	2	0	1	1	1	0	0	1	0
1	11	1	0	4	1	6	1	4	8	4	3	4	4	19	1	1	2	0	1	0	1	2	1	1	0	1	2	1	0	1	1	0	0	1	2	1	1	1	1
1	12	1	1	3	1	3	0	0	0	1	3	3	5	7	1	1	0	1	0	0	1	0	1	0	1	0	0	1	1	0	1	0	0	1	1	0	1	0	2
0	12	1	1	4	1	5	1	6	1	2	3	0	8	6	1	2	0	2	0	0	1	1	1	1	2	0	0	2	0	0	2	1	0	2	2	0	0	0	2
0	13	1	1	10	1	8	1	6	6	4	2	1	8	13	2	0	1	1	1	0	1	1	2	0	2	1	2	2	0	0	2	1	1	1	1	0	0	2	1
0	12	1	1	8	1	5	1	4	5	3	4	4	8	16	2	1	0	1	1	1	1	1	2	2	2	0	1	1	0	2	2	1	0	1	1	0	2	1	2
1	12	1	1	8	0	0	1	5	6	5	6	7	7	24	1	2	1	2	2	1	2	2	2	1	1	1	1	1	1	0	2	2	2	0	1	0	2	2	1
0	12	1	1	2	1	4	1	3	0	2	3	2	6	7	1	0	0	1	1	0	1	0	1	1	1	0	0	1	0	0	2	0	0	1	1	0	0	0	1
1	13	1	1	10	0	0	1	7	8	1	2	2	8	13	0	0	2	2	0	1	2	1	2	0	2	0	2	2	1	1	2	1	0	2	2	0	1	2	1
0	12	1	1	3	0	0	0	0	3	2	3	4	10	12	2	1	1	2	1	2	2	1	2	1	2	0	0	1	0	1	2	1	1	2	2	0	0	0	1
0	13	1	0	3	0	0	0	0	0	0	1	1	9	2	2	0	0	1	0	1	2	0	2	0	2	0	0	2	0	0	2	0	0	2	1	0	0	0	2
0	12	1	1	5	0	0	1	7	7	3	2	3	5	15	2	0	1	1	1	1	1	2	0	0	2	1	1	1	1	2	2	0	1	0	2	0	0	1	1
1	12	1	0	0	0	0	1	6	1	5	6	1	9	13	1	1	0	2	1	1	1	0	2	1	2	1	0	2	2	1	2	2	0	2	1	0	0	0	1
1	12	1	1	7	1	1	0	0	7	5	5	3	5	20	1	1	2	1	1	1	0	1	1	1	2	1	2	1	1	1	1	0	1	1	1	1	0	1	1
0	12	1	1	6	0	10	0	10	9	1	5	7	9	22	1	0	2	2	1	2	2	2	2	0	0	0	2	1	2	2	2	0	0	2	1	0	2	1	0
0	12	1	1	10	1	10	0	8	6	8	8	3	7	25	1	2	0	1	2	0	0	2	2	1	2	1	2	2	2	1	1	2	2	2	1	1	1	1	0
1	12	1	1	7	1	8	1	1	3	3	1	3	6	10	1	0	0	1	0	0	1	1	1	0	0	0	0	1	0	1	2	0	0	1	2	2	0	1	1
0	11	1	0	5	0	3	1	6	1	2	4	0	8	7	2	1	0	1	1	0	1	0	2	0	2	0	0	2	1	0	2	0	0	1	1	0	0	1	1
0	13	1	1	5	0	0	0	0	0	1	1	1	7	3	2	0	0	1	0	0	1	0	1	0	2	0	0	1	0	0	2	0	0	1	2	0	0	0	1
1	12	1	1	7	0	0	0	0	3	1	1	4	10	9	2	0	0	2	0	2	1	2	2	0	2	0	0	1	0	1	2	0	0	2	2	0	1	0	1
0	12	1	1	7	1	7	1	6	1	2	4	2	5	9	1	0	0	1	0	0	0	0	1	1	2	0	0	1	0	1	1	0	1	1	1	0	0	0	0
1	12	1	1	8	0	0	1	7	4	2	4	0	9	10	2	2	1	2	1	0	1	1	1	1	2	0	1	2	0	1	2	0	0	2	1	0	0	0	2
1	12	1	1	8	0	0	1	1	4	3	2	2	10	11	2	1	0	2	0	0	2	1	2	0	2	0	0	2	1	2	2	1	1	2	2	2	1	1	2
0	12	1	1	7	0	0	1	4	6	4	5	4	5	19	1	1	2	1	1	2	1	2	1	1	2	0	1	1	1	0	1	1	1	1	1	1	0	1	1
0	12	1	1	7	1	6	1	7	2	2	2	0	9	6	2	0	0	1	1	0	1	0	2	0	2	0	1	2	0	1	2	0	0	2	1	0	0	0	1
1	12	1	0	1	0	0	0	2	2	2	4	1	6	9	1	0	0	2	0	0	1	0	1	1	2	0	0	1	1	0	2	1	0	0	1	0	0	2	1
0	12	1	1	5	1	4	0	0	0	1	1	0	10	2	2	0	0	2	0	0	1	0	2	0	2	0	0	2	0	0	2	0	0	2	1	0	0	0	2
0	11	1	1	1	0	0	0	0	1	1	2	2	9	6	2	0	1	2	0	0	1	0	2	0	2	0	0	1	0	0	1	0	0	2	0	0	1	0	2
0	12	1	1	8	1	6	0	1	5	3	5	1	8	14	2	1	1	1	1	0	1	1	1	0	2	0	1	2	1	1	2	1	0	2	1	0	1	1	0
0	12	1	0	6	0	3	1	5	8	2	2	3	8	15	2	0	0	1	2	1	2	2	2	0	1	0	2	1	0	2	2	0	0	1	1	0	0	2	1
0	12	1	1	6	1	5	1	4	5	4	7	2	5	18	1	2	1	1	1	0	1	1	2	0	2	0	0	1	2	1	0	2	0	1	0	0	1	2	1
1	12	1	1	9	1	1	1	7	3	1	1	0	10	5	2	0	1	2	1	0	2	0	2	0	2	0	0	2	1	1	2	0	0	2	2	0	0	1	2
0	12	1	1	5	1	4	1	6	4	1	1	0	9	6	2	0	0	2	0	0	1	2	2	0	2	0	0	2	0	1	2	0	0	1	2	0	0	1	1
0	12	1	0	1	0	0	1	2	1	0	2	0	10	3	2	0	0	2	0	0	2	1	2	1	2	0	0	2	0	0	2	0	0	2	1	0	0	0	2
0	12	1	1	9	0	1	0	0	4	2	4	0	7	10	2	1	0	1	1	0	1	1	1	1	2	0	0	2	0	1	2	0	0	1	1	0	0	2	1
1	12	1	1	2	0	0	1	3	2	1	3	1	8	7	2	0	1	2	0	0	1	1	1	0	2	0	0	1	1	0	2	0	0	1	1	0	0	0	1
0	12	1	1	9	1	8	0	0	7	3	2	2	9	14	2	0	1	2	1	2	0	2	2	2	2	0	1	2	0	1	2	0	0	1	2	0	0	2	2
0	12	1	0	5	0	0	0	0	5	1	0	3	9	9	2	0	1	1	1	0	2	1	2	0	2	0	1	1	0	1	2	0	1	2	2	0	1	1	2
1	11	1	1	3	0	0	1	4	4	2	4	1	7	11	2	1	0	1	0	0	2	1	1	2	2	0	2	1	0	1	2	1	0	1	2	1	0	0	1
1	12	1	1	3	0	0	1	4	6	4	3	4	10	17	2	2	1	2	1	0	1	2	2	1	2	0	1	0	0	2	2	2	1	2	2	0	1	0	2
0	12	1	1	1	1	3	1	1	6	1	6	2	10	15	2	1	1	2	1	0	2	2	2	1	2	0	1	1	2	1	2	0	1	2	1	0	0	1	1
1	11	1	1	2	0	0	0	0	4	0	0	2	10	6	2	0	0	2	0	1	2	2	2	0	2	0	0	2	0	0	2	0	0	2	2	0	1	2	2
1	12	1	0	0	0	0	1	1	3	0	2	0	10	5	2	1	0	2	0	0	2	1	2	0	2	0	1	2	0	0	2	0	0	2	2	0	0	1	1
0	12	1	1	6	1	4	0	0	2	3	2	0	8	7	2	2	1	2	1	0	1	0	1	0	2	0	1	2	0	0	2	1	0	1	2	0	0	0	2
0	14	1	1	7	0	0	0	0	2	2	5	1	6	10	2	0	2	1	0	1	0	0	1	0	2	0	0	2	1	0	2	0	0	0	0	0	0	0	0
0	12	1	0	4	0	3	0	3	5	2	4	1	10	12	2	1	1	2	1	0	1	1	2	1	2	0	1	2	0	1	2	0	1	2	1	0	0	1	1
1	11	1	1	7	0	5	0	3	2	2	4	2	8	10	2	1	0	1	0	1	1	1	1	0	2	0	1	2	1	0	2	0	1	2	1	1	0	0	1
0	11	1	1	5	1	2	1	1	1	6	7	1	5	15	1	2	0	1	1	0	0	1	1	0	2	1	0	2	2	0	2	0	0	0	1	2	1	0	0
0	12	1	1	7	0	1	1	5	9	2	5	1	10	17	2	0	1	2	2	0	2	2	2	1	2	0	2	2	2	2	2	0	0	2	1	0	1	2	1
0	12	1	1	6	1	7	1	6	7	3	1	3	8	14	2	0	0	2	1	0	1	2	1	1	2	0	2	1	0	1	2	1	0	1	2	0	2	2	2
0	11	1	1	0	1	2	1	6	3	3	5	3	7	14	1	1	0	2	0	0	1	1	1	1	2	1	1	1	1	1	2	1	1	1	1	0	1	0	1
1	13	1	1	10	0	0	1	7	0	1	0	2	8	3	2	0	0	1	0	0	1	0	1	0	2	0	0	1	0	0	2	0	0	2	2	0	1	0	2
0	13	1	1	6	1	10	1	5	5	1	3	1	5	10	1	2	1	1	0	0	1	2	1	1	2	0	1	1	0	1	1	0	0	1	2	0	0	0	2
1	11	1	1	7	0	0	0	0	1	3	2	2	8	8	2	0	0	1	0	0	1	1	2	0	2	0	0	1	0	0	2	2	1	1	1	0	0	0	1
0	13	1	1	5	0	0	1	3	6	4	5	6	6	21	1	0	0	2	2	2	0	2	1	1	0	0	2	2	1	2	1	0	1	1	0	0	1	0	1
0	13	1	0	0	0	0	0	0	5	2	7	4	10	18	2	2	1	2	2	0	2	2	2	2	1	0	0	1	1	2	2	0	1	2	1	0	1	0	1
0	13	1	1	8	1	9	1	7	4	2	1	0	10	7	2	0	1	2	2	0	2	0	2	0	2	0	1	2	0	2	2	0	0	2	2	0	0	0	1
0	11	1	1	8	0	0	1	2	0	2	1	0	10	3	2	1	0	2	0	0	0	0	2	0	2	0	0	2	0	0	2	0	0	2	2	0	0	0	2
0	13	1	1	4	0	0	0	1	1	0	0	4	10	5	2	0	0	2	0	1	2	1	2	0	2	0	0	1	0	0	2	0	1	2	2	0	1	0	2
1	14	1	0	0	1	10	1	10	4	1	2	2	6	9	2	2	0	1	0	0	1	2	0	0	1	0	0	1	0	2	2	0	0	1	2	0	0	0	2
1	12	1	0	2	1	3	1	1	2	1	6	0	7	9	2	2	0	1	0	0	1	2	1	0	2	0	0	2	1	0	2	0	0	1	1	0	0	0	0
0	11	1	1	9	0	0	0	0	7	3	6	1	9	17	2	1	2	1	2	0	1	1	2	1	2	0	1	2	2	1	2	0	0	2	1	0	1	2	1
0	13	1	1	6	1	10	1	10	9	4	0	9	9	22	2	0	2	1	2	2	2	2	2	0	1	0	2	0	0	1	2	2	2	2	2	0	2	2	2
1	13	1	1	6	1	10	1	7	7	3	4	4	6	18	0	1	2	2	1	0	1	2	1	1	2	0	2	1	1	0	2	0	1	1	2	1	2	1	1
0	13	1	1	10	1	10	1	10	2	2	5	2	8	11	1	0	0	1	1	0	1	2	2	0	2	0	0	1	2	0	2	0	0	2	1	0	1	0	0
0	13	1	0	2	1	10	1	6	3	2	4	3	5	12	1	1	1	2	1	0	1	0	0	0	2	0	1	1	0	0	1	0	1	1	1	0	1	1	0
0	12	1	0	0	1	5	1	3	8	4	4	7	7	23	2	1	1	0	2	2	1	1	2	1	0	0	2	0	1	2	2	1	1	1	2	0	0	2	1
0	11	1	0	6	0	9	1	5	4	4	4	2	4	14	1	0	2	1	0	1	0	0	1	0	1	0	0	2	0	1	0	1	0	1	0	1	0	1	0
1	13	1	1	10	1	10	0	10	1	3	2	2	7	8	1	0	0	1	1	0	1	0	2	0	1	1	0	1	0	1	2	0	0	1	1	0	0	0	1
1	13	1	1	3	1	1	0	0	0	3	5	3	5	11	1	2	0	1	1	0	0	0	1	0	1	0	0	1	1	0	2	0	0	0	1	0	1	0	1
0	13	1	1	10	1	10	1	7	7	3	5	3	10	18	2	1	1	2	2	2	1	1	2	1	2	0	1	2	1	2	2	0	0	2	1	0	1	2	1
1	13	1	1	8	1	5	1	7	1	2	2	1	7	6	2	1	0	1	0	0	1	1	1	1	2	1	0	1	0	0	2	0	0	1	2	0	0	0	2
1	13	1	1	7	0	0	1	6	1	2	8	1	9	12	2	1	0	2	0	0	0	0	1	1	2	0	0	2	2	1	2	0	1	2	0	0	0	0	0
0	12	1	1	10	0	0	1	4	2	3	3	2	10	10	2	0	1	2	1	0	0	0	2	0	2	0	0	2	1	0	2	0	0	2	0	0	2	1	2
0	13	1	1	3	0	0	0	0	2	0	0	4	10	6	2	0	1	2	0	1	2	0	2	0	1	0	0	1	0	1	2	0	0	2	2	0	1	0	2
0	12	1	1	5	1	1	1	4	0	2	2	1	4	5	1	0	0	1	0	0	0	0	1	0	1	0	0	2	0	0	1	0	0	0	1	0	0	0	1
1	13	1	1	8	0	0	1	10	10	3	6	5	5	24	1	2	2	1	2	2	1	2	1	1	2	0	2	1	1	2	1	0	1	1	1	0	1	2	1
1	11	1	1	6	0	0	1	9	1	1	2	0	8	4	2	0	0	1	0	0	1	1	2	0	2	0	0	2	0	0	2	0	0	1	1	0	0	0	1
1	14	1	1	7	0	1	1	5	2	4	4	1	5	11	0	1	0	2	0	0	0	1	1	0	2	0	0	2	1	1	1	0	0	1	1	2	1	0	1
0	13	1	0	0	1	7	1	1	1	1	3	1	9	6	2	0	0	2	0	0	1	0	2	0	2	0	0	2	1	1	2	0	0	1	1	0	1	0	1
0	13	1	1	8	1	8	0	0	8	6	7	6	7	27	2	1	2	1	1	2	0	2	2	1	1	0	2	0	2	1	1	2	1	1	1	1	0	1	0
1	14	1	1	10	1	6	1	8	1	3	6	2	10	12	2	2	0	2	0	0	1	0	2	0	2	0	1	2	2	0	2	2	0	2	1	0	2	0	1
1	13	1	0	0	0	0	1	1	3	2	3	3	8	11	1	0	0	2	0	0	1	1	1	1	2	1	0	1	1	1	2	0	1	2	2	0	1	1	1
1	12	1	0	4	0	0	1	2	3	3	7	2	6	15	1	1	1	1	0	1	1	1	1	1	2	1	1	2	1	0	2	1	1	1	0	0	0	0	0
1	14	1	1	10	1	8	1	10	1	2	4	4	8	11	2	1	0	1	0	0	1	0	2	0	1	0	0	0	1	1	2	1	0	1	1	0	1	0	1
1	13	1	1	10	0	0	1	3	0	2	4	1	8	7	2	2	0	2	0	0	1	0	0	0	2	1	0	2	0	0	2	0	0	2	1	0	1	0	1
1	14	1	1	7	1	3	1	3	1	3	2	0	8	6	1	0	0	1	1	0	1	1	2	0	2	0	0	2	0	0	2	1	0	2	1	0	0	0	1
0	12	1	1	7	1	5	0	0	3	4	2	1	8	10	2	0	0	2	1	0	1	1	1	0	2	0	1	1	0	1	2	0	0	1	1	2	0	0	1
1	13	1	0	7	0	2	1	5	3	3	3	0	8	9	1	1	0	2	1	0	1	1	2	0	2	0	1	2	0	1	2	1	0	1	1	0	0	0	1
0	12	1	1	8	1	7	0	0	3	2	3	0	8	8	2	1	0	1	1	0	1	1	2	1	2	0	1	2	0	0	2	0	0	1	1	0	0	1	2
1	13	1	1	7	1	6	1	5	2	1	1	0	6	4	1	1	0	1	0	0	1	1	1	0	2	0	0	2	0	0	2	0	0	1	2	0	0	1	2
0	13	1	1	5	1	7	1	5	3	1	4	1	9	9	2	1	0	1	0	0	1	1	2	1	1	0	0	2	0	1	2	0	0	2	1	0	0	1	1
1	13	1	0	6	0	0	1	5	1	1	5	1	7	8	1	2	0	1	0	0	1	0	2	1	2	0	0	2	0	1	2	0	0	1	1	0	1	0	1
1	13	1	1	7	1	7	0	0	2	3	4	2	9	11	2	1	0	1	1	0	1	1	2	0	2	0	0	2	1	1	2	1	0	2	1	0	2	0	1
0	13	1	1	5	0	0	0	0	4	1	3	0	8	8	2	1	0	1	0	0	1	2	2	1	2	0	0	2	0	1	2	0	0	1	2	0	0	1	1
0	13	1	1	7	1	5	1	9	5	1	5	2	10	13	2	2	1	2	1	1	2	2	2	0	1	0	0	2	1	1	2	0	0	2	1	0	0	1	1
1	12	1	1	3	0	0	0	0	2	1	3	0	5	6	1	0	0	1	0	0	1	0	1	0	2	0	0	2	1	1	1	0	0	1	2	0	0	1	0
0	13	1	1	2	0	0	1	1	3	0	0	0	10	3	2	0	0	2	0	0	2	1	2	0	2	0	0	2	0	1	2	0	0	2	2	0	0	1	2
0	13	1	1	10	1	10	1	10	9	5	5	5	6	24	1	1	1	1	2	1	1	2	1	1	2	1	2	1	2	2	2	1	1	1	2	0	2	2	1
1	13	1	0	0	0	0	0	0	7	2	3	3	10	15	2	1	1	2	1	1	2	2	2	1	2	1	1	2	1	1	2	0	0	2	2	0	2	2	2
1	12	1	1	5	1	9	1	7	8	5	6	5	6	24	1	1	1	2	2	1	1	2	1	1	1	1	1	1	2	2	1	0	0	1	2	1	2	2	0
0	13	1	1	6	1	8	1	7	0	1	3	0	7	4	1	0	0	2	0	0	1	0	1	0	2	0	0	2	1	0	2	0	0	1	1	0	0	0	1
1	13	1	1	8	0	0	1	2	2	3	3	5	6	13	2	1	0	1	1	2	1	1	1	0	0	0	1	2	1	0	2	1	0	0	2	0	1	0	1
0	13	1	1	8	1	7	1	4	6	1	6	0	10	13	2	2	2	2	1	0	2	2	2	1	2	0	1	2	0	1	2	0	0	2	1	0	0	0	0
0	13	1	1	4	1	3	0	0	3	1	1	0	10	5	2	0	0	2	1	0	2	2	2	1	2	0	0	2	0	0	2	0	0	2	2	0	0	1	2
0	13	1	1	3	0	0	1	7	6	2	1	2	8	11	2	0	1	2	0	1	1	2	1	0	2	0	0	1	0	1	2	1	0	1	2	0	0	2	1
1	13	1	1	3	0	0	0	0	3	1	5	1	6	10	2	0	1	1	0	0	1	1	1	0	2	0	0	1	2	1	1	0	0	1	1	0	0	0	0
0	13	1	1	6	1	3	1	1	5	4	4	1	5	14	1	1	2	0	2	0	1	2	1	1	2	1	0	1	0	1	2	0	0	1	0	0	0	0	2
1	12	1	0	1	0	0	0	0	1	1	5	1	10	8	2	1	0	2	0	0	1	1	2	1	2	0	0	1	1	0	2	0	0	2	1	0	0	0	1
1	13	1	1	6	1	8	0	0	5	1	2	2	10	10	2	0	1	2	1	1	2	1	2	0	2	0	1	2	1	1	2	0	0	2	2	0	1	1	1
0	13	1	1	7	1	7	1	8	4	3	6	2	8	15	1	1	1	2	2	0	1	2	2	1	2	0	0	2	1	1	2	0	1	1	1	0	1	0	0
0	13	1	1	6	0	0	1	5	3	0	4	0	8	7	2	1	1	2	0	0	2	0	1	0	2	0	0	2	1	2	2	0	0	1	1	0	0	0	1
0	12	1	1	9	1	7	1	7	9	3	5	4	8	21	2	1	1	1	2	1	1	2	2	1	1	0	2	1	1	2	2	0	0	1	1	0	1	2	1
0	11	1	1	8	1	7	1	5	5	3	5	3	6	16	1	1	0	1	2	0	1	1	1	2	2	0	1	0	0	1	2	0	1	1	1	0	0	2	1
0	12	1	1	8	0	0	0	0	4	2	6	0	6	12	1	1	1	1	1	0	1	1	2	2	2	0	0	2	0	1	1	0	0	1	1	0	0	1	0
0	12	1	0	0	1	2	0	0	0	1	3	0	10	4	2	1	0	2	0	0	1	0	2	0	2	0	0	2	0	0	2	0	0	2	1	0	0	0	1
0	12	1	1	7	1	7	1	8	5	1	3	2	10	11	2	1	1	2	0	0	1	1	2	1	2	0	0	0	0	1	2	0	0	2	2	0	0	2	1
0	12	1	1	4	0	0	1	7	4	3	4	4	9	15	1	1	1	2	1	0	1	2	2	1	1	0	1	1	0	0	2	1	1	2	1	0	1	0	1
0	12	1	0	3	0	0	0	0	4	3	0	3	10	10	2	0	1	2	1	0	1	2	2	0	2	0	0	1	0	1	2	1	2	2	2	0	0	0	2
0	11	1	1	10	1	10	1	7	6	6	6	4	4	22	1	1	2	1	2	2	0	1	0	0	1	0	2	1	2	0	2	2	0	0	1	0	0	1	0
0	12	1	1	10	1	5	1	5	0	3	4	0	6	7	1	0	0	2	0	0	0	0	1	0	2	1	0	2	1	0	2	0	0	0	0	0	0	0	1
0	11	1	0	0	1	3	0	0	2	3	8	0	10	13	2	2	0	2	1	0	0	1	2	1	2	0	1	2	1	0	2	0	0	2	0	0	0	0	0
0	12	1	1	5	1	6	1	5	6	3	1	0	10	10	2	0	1	2	2	0	1	1	2	0	2	0	0	2	0	2	2	0	0	2	1	0	0	2	2
1	11	1	1	7	1	5	1	4	8	4	3	6	8	21	2	1	1	2	2	1	1	2	1	2	0	0	2	1	0	2	2	1	1	1	2	0	1	1	2
1	12	1	1	8	1	3	1	8	8	4	3	3	10	18	2	1	2	2	1	1	2	1	2	1	2	1	2	1	1	2	2	2	0	2	2	0	1	1	2
0	12	1	1	8	1	2	1	2	0	4	4	4	8	12	1	0	0	1	1	0	0	0	2	0	2	0	0	1	1	0	2	1	1	2	1	0	2	0	0
1	12	1	0	5	1	7	0	5	0	1	0	1	7	2	2	0	0	0	0	1	2	0	2	0	2	0	0	2	0	0	2	1	0	1	2	0	0	0	2
0	12	1	1	3	0	1	1	2	3	1	2	2	6	8	1	0	0	1	0	1	1	1	1	0	2	0	1	1	1	1	2	0	0	1	1	0	0	0	2
0	12	1	1	7	0	0	1	2	7	4	5	8	9	24	2	1	2	2	1	1	1	1	2	2	1	0	2	0	0	1	2	2	2	1	1	0	2	1	1
1	13	1	1	6	0	0	1	5	1	2	3	5	3	11	1	0	0	1	0	0	1	0	0	0	0	0	0	0	1	0	1	0	0	0	1	1	1	1	1
0	13	1	1	8	1	9	0	0	6	2	3	3	7	14	1	0	0	2	1	0	1	2	1	0	1	0	2	1	1	2	2	0	0	1	1	0	1	0	1
0	12	1	1	5	1	4	1	6	1	2	2	3	8	8	2	0	1	2	1	0	1	0	2	0	0	0	0	1	0	0	2	0	0	0	1	0	0	0	1
1	11	1	0	3	0	3	0	10	3	1	2	1	8	7	2	1	0	1	0	1	1	1	2	0	2	0	0	2	0	1	2	0	0	1	1	0	0	1	2
0	13	1	1	8	1	9	1	8	6	3	3	3	10	15	2	1	1	2	1	0	0	2	2	0	2	0	2	0	1	1	2	0	1	2	1	0	0	0	2
1	13	1	1	7	0	0	1	6	6	1	5	3	9	15	2	2	0	1	0	0	1	2	2	1	2	0	0	1	1	2	2	0	2	2	2	0	0	2	1
0	11	1	1	7	1	8	0	0	2	3	2	0	8	7	2	0	0	2	1	0	0	1	1	0	2	0	1	2	1	0	2	0	0	1	2	0	0	0	1
1	13	1	1	5	0	0	1	8	8	2	3	1	7	14	2	0	0	2	1	0	1	2	1	0	2	0	2	1	1	2	2	0	0	0	1	0	0	2	1
0	13	1	0	5	0	2	0	0	4	2	3	4	8	13	2	1	0	1	1	0	1	2	2	0	1	0	1	1	1	1	2	0	2	1	2	0	0	0	1
1	13	1	1	5	1	8	1	10	10	3	7	5	5	25	1	1	2	1	2	1	1	2	0	0	2	0	2	0	2	2	2	0	2	1	0	0	0	2	0
0	12	1	0	3	0	0	1	1	6	2	0	9	9	17	2	0	0	1	0	2	2	1	2	0	1	0	2	0	0	1	2	2	2	2	2	0	2	2	2
0	13	1	1	8	0	0	0	0	7	1	4	1	9	13	2	2	1	2	0	0	1	2	2	0	2	0	1	1	0	2	2	0	0	1	1	0	0	1	1
1	13	1	1	9	0	0	1	7	6	3	5	4	7	18	1	1	1	1	0	1	1	2	2	1	2	0	2	1	1	0	1	1	1	2	1	1	1	1	1
0	13	1	1	2	0	0	1	2	4	2	3	2	10	11	2	2	2	2	1	0	1	1	2	1	1	0	1	2	0	0	2	0	0	2	2	0	1	0	2
0	13	1	1	4	0	0	1	3	6	2	5	1	8	14	2	0	1	1	0	0	1	2	2	2	2	1	0	1	1	2	2	0	0	1	1	0	0	1	1
0	13	1	1	5	0	3	1	3	5	5	3	0	9	13	2	1	1	1	1	0	1	1	2	0	2	0	1	2	0	1	2	1	0	2	1	2	0	1	1
0	12	1	1	8	1	6	1	5	7	1	4	1	5	13	1	1	2	1	0	0	2	2	1	1	2	0	0	1	0	1	1	1	0	1	1	0	0	2	1
0	13	1	1	10	1	10	1	7	3	0	5	3	7	11	1	2	0	1	0	0	2	1	2	0	2	0	0	2	0	1	2	0	1	1	0	0	2	1	1
0	13	1	1	8	1	10	1	9	6	0	0	3	10	9	2	0	1	2	0	0	2	2	2	0	2	0	1	1	0	1	2	0	1	2	2	0	1	1	2
0	13	1	1	7	1	6	1	7	2	3	3	3	7	11	2	0	0	1	1	0	1	1	1	0	1	0	0	1	1	0	1	0	0	2	1	1	1	1	1
0	13	1	1	8	1	8	1	6	4	3	4	2	8	13	2	1	0	2	2	1	1	2	2	0	2	0	1	2	1	1	2	0	0	0	1	0	1	0	1
0	11	1	1	7	1	6	0	0	2	1	3	3	10	9	2	1	0	2	0	0	1	0	2	0	2	0	0	1	1	1	2	0	0	2	1	0	2	1	2
0	13	1	0	0	1	1	0	0	6	0	3	3	10	12	2	1	1	2	0	1	2	2	2	2	2	0	1	2	0	1	2	0	1	2	2	0	1	1	2
1	13	1	1	5	0	5	1	9	6	0	3	1	7	10	2	2	2	1	0	0	2	2	1	0	1	0	1	2	0	1	2	0	0	1	2	0	0	0	1
1	12	1	1	8	1	10	1	7	1	4	10	2	3	17	1	2	0	0	0	2	0	0	1	2	2	1	1	2	2	0	0	0	0	1	0	1	0	0	0
1	12	1	1	10	0	0	1	9	8	3	2	2	9	15	2	0	2	1	2	0	1	2	2	1	2	0	1	1	0	2	2	0	0	2	2	0	1	1	1
0	14	1	1	9	1	10	1	5	4	2	5	2	6	13	2	0	1	0	1	0	1	1	0	1	2	0	0	2	2	1	2	0	0	2	2	0	2	1	0
1	12	1	0	4	0	0	0	0	4	2	4	6	4	16	1	0	0	0	0	1	2	1	0	1	1	0	0	1	1	2	2	2	2	1	1	0	1	1	1
0	13	1	1	2	0	0	0	0	3	2	2	2	9	9	1	0	1	2	1	0	1	0	2	0	1	0	1	2	0	1	2	0	0	2	1	0	1	0	1
1	13	1	1	6	0	0	1	3	3	3	7	3	7	16	1	2	0	1	2	2	1	2	2	2	2	0	0	1	1	1	2	0	0	1	1	0	0	0	1
0	13	1	1	4	0	0	0	0	0	1	2	1	5	4	1	0	0	1	0	0	1	0	1	0	2	0	0	1	0	0	1	0	0	1	1	0	0	0	1
1	13	1	0	1	0	0	0	0	0	2	1	0	5	3	1	0	0	1	0	0	1	0	1	0	2	0	0	2	0	0	1	1	0	1	2	0	0	0	1
0	13	1	1	8	0	0	1	2	2	0	2	1	7	5	2	0	0	1	0	0	2	1	1	0	2	0	0	1	0	1	2	0	0	1	1	0	0	0	1
0	13	1	1	7	0	0	1	4	5	2	5	1	9	13	2	2	1	1	1	1	1	1	2	1	2	0	1	2	1	1	2	0	0	2	2	0	0	1	1
1	13	1	0	1	0	0	1	1	0	4	2	0	9	6	2	0	0	2	1	0	0	0	2	0	2	0	0	2	1	0	2	1	0	1	2	0	0	0	1
1	13	1	0	1	0	0	1	1	0	2	0	2	7	4	2	0	0	1	0	0	0	0	1	0	1	0	0	1	0	0	2	0	0	1	2	0	0	0	2
0	11	1	1	1	1	10	1	4	6	3	3	4	10	16	2	1	2	2	1	0	1	1	2	1	2	1	1	1	1	1	2	0	2	2	2	0	1	1	2
0	11	1	1	2	1	8	0	0	7	4	5	7	8	23	2	1	2	1	2	2	1	2	2	1	1	0	2	0	1	1	2	1	0	1	1	0	2	0	1
0	11	1	1	7	0	0	1	3	2	5	3	6	6	16	1	1	0	0	2	0	0	1	2	0	0	1	0	0	0	1	2	0	0	1	1	0	2	0	1
0	11	1	1	6	0	0	0	0	2	1	1	3	10	7	2	0	1	2	1	0	2	1	2	1	2	0	0	1	0	0	2	0	2	2	2	0	0	0	2
0	11	1	1	5	0	0	1	3	0	2	4	1	7	7	1	1	0	0	0	0	0	0	2	1	2	0	0	2	0	0	2	0	0	2	1	0	1	0	1
0	11	1	1	8	0	0	1	7	4	4	8	2	8	18	1	2	1	1	2	1	1	1	2	1	2	0	0	1	1	2	2	1	0	2	0	0	0	0	0
0	13	1	1	10	1	7	1	6	7	3	7	2	7	19	1	2	1	2	1	0	1	1	1	0	2	0	2	1	2	1	2	1	0	1	1	0	1	2	0
1	13	1	1	3	0	1	1	1	0	2	4	0	10	6	2	0	0	2	0	0	0	0	2	0	2	0	0	2	2	0	2	0	0	2	1	0	0	0	1
0	12	1	0	3	1	7	0	1	2	2	2	4	10	10	2	1	0	2	1	0	1	1	2	0	2	0	1	0	0	0	2	0	2	2	2	0	0	0	1
1	13	1	1	9	0	3	1	3	3	2	1	0	7	6	1	0	1	1	1	0	1	2	2	0	2	0	0	2	0	0	2	0	0	1	1	0	0	0	2
1	12	1	1	1	0	0	0	0	5	2	1	7	7	15	2	0	1	1	2	1	2	1	1	1	2	0	1	0	0	1	2	0	2	1	2	0	2	1	2
1	12	1	1	8	0	0	1	5	3	2	6	2	9	13	2	2	0	1	1	0	1	2	2	0	2	0	1	1	2	0	2	0	1	2	1	0	0	0	1
0	12	1	1	3	1	5	0	0	1	3	5	2	6	11	1	1	0	1	1	0	1	1	2	1	2	0	0	0	0	0	1	0	0	1	1	1	0	0	0
0	11	1	1	10	1	10	1	10	8	6	6	0	8	20	1	0	2	2	2	0	0	1	2	0	2	0	2	2	2	1	2	2	0	1	0	0	0	2	0
0	12	1	1	10	1	10	1	10	8	8	4	3	9	23	2	1	2	2	2	1	0	2	2	2	2	2	1	2	1	1	2	2	1	1	2	0	1	2	2
0	13	1	1	10	1	5	1	3	7	3	7	5	7	22	2	1	1	1	1	0	1	2	1	1	1	0	1	1	2	2	2	1	1	1	1	0	2	1	0
0	11	1	1	9	1	8	1	10	5	1	7	1	10	14	2	2	1	2	0	0	1	0	2	1	2	0	0	2	1	2	2	0	0	2	1	0	1	2	0
1	12	1	1	8	0	0	1	2	5	10	7	4	4	26	1	0	2	1	2	1	0	1	0	2	1	2	0	1	2	2	1	2	0	1	0	2	1	0	1
1	12	1	1	9	1	7	1	3	4	7	3	5	8	19	1	1	2	1	2	0	1	1	2	0	1	2	0	1	1	1	2	2	2	2	1	0	1	0	2
1	12	1	1	8	1	9	1	4	7	8	5	5	6	25	0	1	1	1	2	0	0	2	1	2	1	1	2	1	0	1	2	1	1	2	1	2	2	1	1
1	11	1	1	6	0	3	0	6	1	2	5	1	10	9	2	1	1	2	1	0	1	0	2	1	2	0	0	2	1	0	2	0	1	2	1	0	0	0	1
0	12	1	1	7	0	0	0	0	1	1	2	2	6	6	1	0	0	1	0	0	1	0	1	0	2	0	0	1	0	1	2	0	0	1	1	0	1	0	1
0	12	1	1	4	1	7	0	0	3	1	2	1	8	7	2	0	0	2	0	0	1	1	1	0	2	0	0	1	0	1	2	0	0	1	1	0	0	1	1
0	12	1	1	7	1	5	0	0	2	1	2	0	10	5	2	1	0	2	1	0	2	0	2	0	2	0	0	2	0	1	2	0	0	2	1	0	0	1	2
0	12	1	1	3	1	2	0	0	0	1	4	0	10	5	2	1	0	2	1	0	2	0	2	0	2	0	0	2	1	0	2	0	0	2	1	0	0	0	1
1	11	1	0	4	0	1	0	2	2	1	2	3	5	8	1	0	0	1	0	1	1	2	0	0	2	0	0	1	0	0	2	0	0	1	1	0	1	0	1
1	13	1	0	4	0	0	0	1	2	1	1	5	6	9	1	0	0	1	0	1	1	1	1	0	2	0	0	1	0	1	2	0	1	1	1	0	2	0	2
1	12	1	0	6	0	5	1	6	9	2	6	3	7	20	2	2	1	1	2	1	2	2	2	1	2	0	2	1	1	2	1	0	0	1	1	0	1	2	1
1	12	1	0	0	0	0	1	7	1	0	2	2	10	5	2	0	0	2	0	1	2	0	2	0	2	0	0	2	1	1	2	0	0	2	2	0	1	0	1
0	12	1	0	0	0	0	1	2	4	1	3	2	10	10	2	0	1	2	1	1	2	1	2	0	2	0	0	2	1	0	2	0	0	2	1	0	1	2	1
0	12	1	0	6	1	7	1	5	4	3	0	4	8	11	1	0	1	2	1	1	1	0	2	0	2	0	1	1	0	1	2	1	1	1	2	0	1	1	2
0	12	1	1	7	0	0	1	6	3	3	5	2	10	13	2	1	1	2	1	0	1	1	2	1	2	0	1	1	1	0	2	1	1	2	1	0	0	0	1
1	13	1	0	4	0	0	0	0	2	1	4	6	6	13	1	0	0	1	0	1	1	1	1	0	0	0	0	0	1	1	2	0	0	1	0	0	1	0	1
1	12	1	0	1	1	2	0	0	0	0	4	0	7	4	2	0	0	2	0	0	2	0	1	0	2	0	0	2	2	0	2	0	0	0	1	0	0	0	1
1	12	1	1	5	0	5	1	4	0	2	1	4	8	7	2	0	0	0	0	0	0	0	2	0	2	0	0	0	0	0	2	0	0	2	1	0	2	0	2
1	12	1	1	5	0	0	1	2	1	4	6	1	5	12	1	2	0	1	1	0	1	1	0	0	2	0	0	2	1	0	2	1	0	1	0	1	1	0	1
0	11	1	1	7	0	0	0	0	1	1	1	1	10	4	2	0	0	2	0	0	1	1	2	0	2	0	0	1	0	0	2	0	0	2	1	0	0	0	2
0	12	1	1	8	1	4	0	0	7	3	8	4	9	22	2	2	1	2	1	0	1	2	2	2	1	0	1	1	1	2	2	1	2	1	0	0	0	1	1
0	12	1	1	5	1	6	1	4	4	2	5	2	7	13	2	1	0	1	1	0	2	1	1	0	2	0	2	1	0	0	2	1	1	1	0	0	0	1	0
0	12	1	0	8	0	0	1	1	2	2	2	3	9	9	2	0	1	2	1	2	1	0	2	0	2	0	0	1	1	1	2	0	0	1	2	0	0	0	1
1	12	1	1	2	0	0	1	2	1	1	9	2	7	13	1	2	1	2	1	1	2	0	1	1	2	0	0	2	2	0	2	0	0	1	0	0	1	0	0
0	12	1	1	8	1	7	1	7	4	4	7	3	6	18	1	1	0	1	2	0	2	1	1	2	2	0	1	1	1	1	2	2	1	1	0	0	1	1	1
1	12	1	1	10	0	0	1	7	3	5	7	0	8	15	1	2	0	2	2	0	0	1	2	0	2	0	2	2	2	0	2	1	0	1	1	0	0	0	0
0	11	1	1	7	0	0	1	3	4	3	4	2	10	13	2	1	0	2	1	1	1	2	2	0	2	0	1	2	1	1	2	1	0	2	1	0	1	0	1
0	12	1	1	7	1	5	1	4	3	4	6	2	10	15	2	1	0	2	1	0	2	0	2	2	2	1	1	1	1	1	2	1	1	2	1	1	0	1	1
0	11	1	0	0	0	0	0	0	3	1	3	5	9	12	2	1	0	2	1	2	2	1	2	2	2	0	1	1	0	1	1	0	0	2	2	0	2	0	2
0	12	1	1	8	0	0	1	7	3	3	5	2	6	13	1	1	1	1	1	0	1	1	1	1	2	1	0	1	1	1	2	0	1	1	1	0	0	0	1
1	11	1	0	0	0	10	0	10	1	1	0	1	8	3	2	0	0	0	1	0	2	1	2	0	2	0	0	2	0	0	2	0	1	2	2	0	0	0	2
0	12	1	1	4	0	0	0	0	4	3	7	1	6	15	2	2	1	1	0	0	0	1	1	1	2	0	1	1	1	1	1	1	0	1	1	0	0	0	0
0	11	1	1	3	1	8	0	0	10	3	5	3	7	21	2	2	2	1	1	1	1	2	2	0	1	0	2	2	2	2	1	1	0	1	2	0	1	2	1
1	11	1	1	4	0	0	0	0	1	2	4	1	7	8	1	2	0	1	0	0	0	1	1	0	2	0	0	2	1	0	2	0	0	2	1	0	1	0	2
0	11	1	1	8	0	0	1	6	4	2	1	0	10	7	2	0	1	2	0	0	0	1	2	0	2	0	0	2	0	1	2	0	0	2	1	0	0	1	2
0	12	1	1	7	0	1	0	0	7	3	3	4	6	17	1	0	1	1	2	1	1	2	1	0	2	0	2	1	1	1	2	0	1	1	1	0	1	1	1
0	12	1	1	8	0	0	0	0	6	3	3	1	7	13	1	0	1	2	1	0	1	2	2	1	2	1	0	2	1	2	1	0	1	1	2	0	0	1	1
1	13	1	1	7	1	7	1	3	2	1	3	0	10	6	2	1	0	2	1	0	2	2	2	1	2	0	0	2	0	0	2	0	0	2	1	0	0	0	2
0	13	1	1	6	1	8	1	3	6	4	3	4	5	17	1	1	1	0	1	0	1	2	1	0	0	1	1	1	1	1	2	0	0	1	2	1	1	1	1
0	12	1	0	6	0	5	1	2	1	2	4	0	5	7	1	0	1	1	0	0	1	0	1	0	2	1	0	2	1	0	1	0	0	1	1	0	0	0	0
1	13	1	1	10	1	10	1	8	2	3	6	3	6	14	0	1	0	2	0	0	0	1	1	2	2	1	0	1	2	1	2	0	0	1	1	0	2	0	2
1	11	1	1	4	0	0	0	0	4	1	5	2	6	12	1	1	0	1	0	0	1	2	1	0	1	0	1	2	1	1	2	0	1	1	1	0	0	0	0
1	12	1	1	7	0	0	0	0	4	2	7	3	9	16	1	1	0	2	1	0	2	2	2	1	2	1	1	1	2	1	2	0	1	2	1	0	1	0	0
1	13	1	0	0	1	2	0	0	0	0	1	6	7	7	2	0	0	1	0	1	2	0	1	0	2	0	0	1	0	0	2	0	2	1	2	0	2	0	1
0	12	1	1	7	0	0	1	4	3	2	2	2	6	9	1	0	1	1	0	0	0	0	1	0	2	0	0	0	0	2	2	0	0	1	1	0	0	0	1
0	13	1	1	6	1	9	1	4	6	3	9	1	7	19	1	2	2	1	1	0	2	1	1	1	2	1	2	2	2	1	2	1	0	2	0	0	1	0	0
0	13	1	1	9	1	4	1	3	4	4	2	0	6	10	1	0	1	1	2	0	0	1	2	0	2	0	1	2	0	1	1	0	0	1	1	0	0	0	1
0	13	1	1	8	1	9	0	0	7	3	6	2	7	18	1	1	2	1	2	0	1	2	2	1	2	0	2	0	1	0	2	0	0	1	1	0	0	1	0
0	13	1	1	5	1	3	1	10	4	3	3	1	6	11	1	1	1	1	1	0	0	1	1	0	2	0	2	2	0	0	2	0	0	1	1	0	1	0	1
0	12	1	1	10	1	10	1	5	9	4	7	4	5	24	1	2	1	0	2	2	1	2	1	1	2	0	2	1	2	2	2	1	1	1	0	0	0	2	2
1	12	1	1	10	0	4	1	2	4	4	6	3	3	17	0	1	2	1	1	0	1	0	1	0	2	0	0	1	2	1	0	1	2	1	0	1	0	1	1
1	13	1	1	5	1	3	1	5	1	6	7	0	8	14	2	1	0	1	1	0	0	0	2	1	2	0	0	2	2	1	2	1	0	1	0	2	0	0	1
1	15	1	1	7	0	0	0	0	5	1	3	2	8	11	2	2	0	2	0	0	2	1	2	0	2	0	2	2	0	1	0	1	0	2	1	0	2	1	2
1	13	1	0	3	1	7	1	5	5	1	6	1	8	13	2	1	0	1	0	0	1	2	2	1	2	0	1	2	2	2	2	0	0	1	1	0	1	0	1
1	13	1	0	0	1	9	0	0	2	1	3	1	7	7	1	0	0	1	0	0	1	1	2	1	2	0	0	2	0	1	2	0	1	1	1	0	0	0	1
0	12	1	0	0	0	0	0	0	5	2	4	7	8	18	2	0	0	2	1	2	1	1	1	0	2	0	1	0	2	2	2	0	1	1	2	0	2	1	0
1	10	1	0	0	0	0	0	0	3	1	3	1	3	8	1	0	1	0	0	0	1	1	0	0	2	0	0	1	1	0	1	0	0	1	2	0	0	1	0
1	10	1	0	0	0	0	0	0	4	2	8	2	5	16	1	2	0	0	1	0	1	1	1	0	1	0	1	2	2	2	2	0	0	1	0	0	1	0	0
0	11	1	0	1	1	3	0	0	0	2	9	1	6	12	1	2	0	1	0	0	0	0	1	1	2	0	0	2	2	0	2	0	0	1	0	0	1	0	0
1	11	1	1	5	1	6	0	0	3	5	2	2	8	12	1	0	0	2	2	0	1	1	2	0	2	0	1	1	0	1	1	1	0	2	1	1	1	0	1
0	11	1	1	8	1	10	1	5	6	0	7	2	10	15	2	2	0	2	0	0	2	0	2	2	2	0	2	2	2	2	2	0	0	2	2	0	2	2	1
0	10	1	1	4	1	1	0	0	2	4	8	2	7	16	2	2	0	2	1	1	1	1	1	2	2	0	0	1	2	1	1	1	0	1	1	1	0	0	1
0	11	1	1	8	1	7	1	5	1	2	5	2	9	10	2	2	0	1	1	0	1	1	2	1	2	0	0	2	0	0	2	0	0	2	0	0	2	0	2
0	11	1	1	3	1	10	1	8	8	8	6	4	9	26	2	2	2	2	2	2	2	2	2	2	2	2	2	2	2	2	2	2	0	1	2	2	2	0	2
0	10	1	1	7	0	0	1	3	3	4	7	0	5	14	1	2	1	1	0	0	0	0	1	0	2	0	0	2	2	2	1	1	0	1	1	1	0	0	0
0	12	1	1	7	0	1	1	3	2	4	5	0	6	11	1	2	0	1	0	0	0	0	2	0	2	0	0	2	0	2	1	1	0	1	1	1	0	0	0
1	10	1	0	0	0	0	0	0	6	2	5	1	6	14	1	2	1	2	1	0	1	1	1	1	2	0	1	1	1	1	2	0	0	0	2	0	0	2	1
0	11	1	1	4	0	0	0	0	7	2	4	5	9	18	2	1	1	2	1	0	2	2	2	0	2	1	1	0	1	1	2	0	2	1	1	0	1	2	1
0	11	1	1	7	1	6	1	8	7	5	8	3	8	23	2	2	0	1	1	0	0	1	2	0	2	0	2	1	2	2	1	1	1	2	0	1	1	2	0
0	11	1	1	6	1	3	1	4	8	5	5	6	9	24	2	1	1	1	1	1	1	2	2	1	1	1	2	0	1	1	2	1	2	2	1	1	0	2	1
0	10	1	1	8	1	8	1	10	4	1	5	2	8	12	2	2	0	1	0	1	1	0	2	0	2	0	1	1	0	1	2	0	0	1	0	0	0	2	1
1	11	1	1	3	1	3	0	0	1	4	4	3	7	12	1	0	0	1	0	0	1	1	1	1	1	1	0	1	2	0	2	2	1	2	2	0	0	0	1
1	11	1	1	8	1	8	0	0	2	2	3	0	10	7	2	2	1	2	2	0	2	1	2	0	2	0	0	2	1	0	2	0	0	2	2	0	0	0	2
1	13	1	0	5	0	0	1	5	0	0	0	1	10	1	2	0	0	2	0	0	2	0	2	0	2	0	0	2	0	0	2	0	0	2	2	0	1	0	2
0	10	1	1	8	1	4	1	10	7	4	5	0	5	16	1	1	2	1	2	0	0	2	1	0	2	0	2	2	1	1	2	0	0	0	0	0	0	0	1
0	11	1	1	10	0	0	1	6	8	3	9	0	7	20	1	2	1	2	2	0	1	2	1	2	2	0	1	2	2	2	2	0	0	1	0	0	0	2	1
0	10	1	1	8	0	0	1	5	3	3	3	1	6	10	2	1	0	1	2	0	1	1	1	0	2	0	1	1	0	0	1	0	0	1	1	0	0	1	1
1	11	1	1	9	1	8	1	3	1	4	8	2	9	15	2	2	0	2	1	0	0	1	2	2	2	0	0	2	2	0	2	0	0	1	0	1	2	0	2
1	11	1	1	2	0	0	0	0	0	2	6	2	7	10	1	1	0	2	1	0	1	0	1	1	2	0	0	1	1	0	2	0	1	1	1	0	0	0	0
1	10	1	1	5	0	0	1	7	5	1	7	2	5	15	1	2	0	1	0	1	2	2	1	2	2	0	0	1	1	2	1	1	0	1	1	0	0	1	1
0	11	1	1	4	0	0	0	0	3	1	4	1	5	9	1	1	0	1	0	0	1	1	1	0	2	0	0	1	0	1	1	0	0	1	1	0	0	1	0
1	10	1	1	8	1	6	1	5	4	2	4	1	10	11	2	2	1	2	1	0	1	2	2	1	2	0	1	1	0	0	2	0	0	2	1	0	0	0	2
0	11	1	1	5	1	8	1	6	4	1	5	0	9	10	2	1	1	2	0	0	1	1	2	2	2	0	1	2	0	0	2	0	0	1	1	0	0	1	1
1	10	1	0	0	0	0	0	10	0	1	1	0	9	2	2	0	0	1	0	0	1	0	2	0	2	0	0	2	0	0	2	0	0	2	2	0	0	0	1
1	11	1	1	2	0	1	0	1	0	2	6	2	3	10	1	1	0	1	0	0	1	0	0	1	1	0	0	1	1	0	0	1	0	1	1	0	0	0	0
0	10	1	0	1	0	0	1	1	1	0	2	0	10	3	2	1	0	2	0	0	2	1	2	0	2	0	0	2	0	0	2	0	0	2	1	0	0	0	2
1	10	1	0	3	0	3	0	3	1	0	3	0	7	4	0	1	0	2	0	0	2	1	2	1	2	0	0	2	1	0	2	0	0	1	2	0	0	0	2
0	10	1	0	5	0	0	0	0	1	1	0	0	10	2	2	0	1	2	0	0	2	0	2	0	2	0	0	2	0	0	2	1	0	2	2	0	0	0	2
1	11	1	1	8	0	0	0	0	3	2	6	2	8	13	1	2	0	2	0	0	2	0	2	0	2	1	1	1	2	0	2	0	0	1	1	1	1	2	1
0	11	1	1	8	0	0	1	10	6	4	9	2	4	21	1	2	1	0	2	0	2	1	1	1	2	0	0	2	2	2	2	2	2	0	0	0	0	2	0
0	11	1	1	6	0	0	0	0	0	1	0	0	9	1	2	0	0	2	0	0	1	0	1	0	2	0	0	2	0	0	2	0	0	2	2	0	0	0	2
0	10	1	0	0	0	0	0	0	0	1	1	0	8	2	2	0	0	1	0	0	1	0	2	0	2	0	0	2	0	0	2	0	0	1	2	0	0	0	1
0	12	1	1	4	0	0	1	9	9	5	5	4	6	23	2	0	1	0	2	0	1	2	1	2	2	0	2	1	2	2	2	2	2	1	2	0	1	2	1
1	11	1	0	5	0	2	0	1	2	1	2	2	10	7	2	0	0	2	0	0	1	1	2	0	2	0	0	2	0	0	2	0	0	2	0	0	2	1	2
1	11	1	1	6	0	2	1	8	3	4	7	3	7	17	1	2	0	1	2	0	1	2	1	1	2	0	0	1	2	1	2	1	1	2	1	0	1	0	1
0	11	1	0	1	0	1	0	0	0	0	2	1	10	3	2	0	0	2	0	0	2	0	2	0	2	0	0	1	0	0	2	0	0	2	0	0	0	0	2
1	11	1	1	3	0	0	1	4	1	1	3	1	9	6	2	1	0	2	1	0	2	0	2	1	2	0	0	2	0	0	2	0	0	1	1	0	1	1	2
0	11	1	0	9	1	8	0	7	5	2	3	3	6	13	1	0	1	1	0	0	0	1	0	1	1	0	1	1	1	1	2	0	0	2	1	0	1	1	2
0	11	1	0	5	0	9	0	9	2	4	2	1	7	9	2	0	1	1	1	0	1	0	2	0	2	0	0	2	0	1	2	2	0	0	0	0	1	0	2
1	10	1	1	10	1	10	1	6	0	4	3	1	5	8	1	0	0	1	1	0	0	0	1	0	2	0	0	1	0	0	2	0	0	0	0	1	0	0	1
0	10	1	1	5	0	0	1	2	3	3	4	0	6	10	1	2	1	1	1	0	0	1	2	0	2	0	0	2	0	1	0	0	0	2	1	0	0	0	1
1	13	1	1	4	0	0	1	5	1	1	5	1	4	8	1	1	0	1	0	0	1	1	0	1	2	0	0	1	1	0	1	0	0	1	1	0	0	0	1
1	13	1	1	3	1	3	1	7	8	7	5	7	8	27	1	1	1	1	2	1	0	2	2	2	0	1	1	1	2	2	2	0	1	2	2	2	2	2	2
0	13	1	1	4	1	10	1	5	3	1	1	0	10	5	2	1	1	2	1	0	2	1	2	0	2	0	0	2	0	0	2	0	0	2	2	0	0	1	2
0	13	1	1	9	1	10	1	7	4	2	1	0	9	7	2	0	0	2	1	0	1	2	2	0	2	0	0	2	0	1	2	0	0	1	2	0	0	1	1
1	13	1	1	8	1	5	1	10	2	1	4	1	9	8	2	1	1	1	0	0	1	1	2	1	2	0	0	1	1	0	2	0	0	2	2	0	0	0	1
1	13	1	1	9	1	4	1	10	4	1	5	4	7	14	2	2	1	1	0	0	1	1	2	1	2	0	0	0	0	1	2	0	2	0	2	0	0	1	0
0	13	1	1	9	1	9	1	10	2	0	4	1	10	7	2	1	1	2	0	0	2	1	2	0	2	0	0	2	1	0	2	0	0	2	1	0	1	0	1
1	13	1	0	0	0	0	0	0	0	1	1	0	10	2	2	0	0	2	0	0	1	0	2	0	2	0	0	2	0	0	2	0	0	2	1	0	0	0	2
1	12	1	1	7	0	5	0	5	0	0	1	0	10	1	2	1	0	2	0	0	2	0	2	0	2	0	0	2	0	0	2	0	0	2	2	0	0	0	2
1	13	1	1	10	1	10	1	10	1	2	1	0	10	4	2	0	0	2	0	0	0	0	2	0	2	0	0	2	0	1	2	0	0	2	1	0	0	0	2
1	13	1	1	5	0	0	0	0	0	1	4	0	8	5	1	1	0	1	1	0	2	0	2	0	2	0	0	2	1	0	2	0	0	2	1	0	0	0	1
0	12	1	0	0	1	2	1	2	3	1	3	4	5	11	1	0	1	1	0	0	1	0	1	0	1	0	0	1	1	1	1	0	1	1	1	0	1	1	1
0	12	1	1	4	0	0	1	3	6	5	9	2	6	22	2	1	1	1	2	1	0	1	1	2	2	1	2	2	2	2	2	0	1	0	0	0	0	0	0
0	13	1	1	10	1	6	1	8	6	4	3	2	8	15	1	2	1	2	2	0	1	2	2	0	2	1	2	1	1	0	1	0	0	2	2	0	1	1	2
0	12	1	1	10	1	8	0	0	2	6	1	1	7	10	1	0	0	1	2	0	1	1	2	0	1	2	0	2	0	0	2	1	0	1	1	0	0	1	2
0	13	1	1	7	1	8	0	0	6	1	4	3	8	14	2	1	2	1	0	1	1	0	2	1	2	0	1	1	1	2	2	0	1	1	2	0	0	1	1
0	13	1	1	6	1	2	0	0	4	2	5	2	5	13	1	1	0	1	0	0	1	1	1	1	2	0	2	0	0	1	1	1	0	1	1	0	0	0	0
0	13	1	1	4	1	5	1	3	3	1	2	0	8	6	2	0	1	1	0	0	1	1	2	0	2	0	0	2	0	1	2	0	0	1	1	0	0	0	1
0	13	1	1	7	1	5	0	1	3	0	3	3	8	9	2	1	0	1	0	0	2	1	1	0	2	0	0	1	0	1	2	0	1	2	1	0	1	1	1
0	13	1	1	7	1	5	0	0	3	2	2	0	9	7	2	1	1	2	1	0	1	0	2	0	2	0	1	2	0	0	2	0	0	1	2	0	0	1	1
0	13	1	1	9	1	6	1	4	6	4	7	2	9	19	2	0	1	2	2	1	0	1	2	2	2	0	1	2	2	1	2	0	0	1	1	0	1	2	0
0	12	1	1	6	1	4	1	8	1	1	3	1	10	6	2	1	0	2	0	0	1	1	2	0	2	0	0	1	0	0	2	0	0	2	1	0	0	0	1
1	12	1	0	6	0	0	1	1	0	1	4	3	4	8	1	1	0	1	0	0	1	0	1	0	2	0	0	1	0	0	0	0	0	1	1	0	2	0	0
1	13	1	1	4	0	1	1	4	3	0	1	0	6	4	1	1	0	1	0	0	2	1	1	0	2	0	0	2	0	1	2	0	0	1	2	0	0	1	2
0	11	1	1	7	0	1	1	7	4	3	3	1	7	11	2	1	0	1	1	0	1	1	1	0	2	0	1	1	1	1	2	1	0	1	2	0	0	1	1
1	14	1	1	8	1	9	1	10	1	4	5	5	6	15	0	1	0	0	1	2	1	0	2	0	1	0	0	2	2	0	2	1	0	2	1	1	2	1	1
1	13	1	1	4	1	3	1	3	2	3	4	4	6	13	1	1	1	2	1	0	1	0	0	0	1	0	0	1	1	1	2	0	0	1	1	1	2	0	1
0	13	1	1	9	1	9	1	5	6	5	7	3	6	21	1	1	0	1	2	1	1	2	1	2	1	1	2	2	1	1	2	1	1	1	0	0	0	1	1
1	12	1	0	0	0	0	1	4	1	7	5	3	4	16	1	2	0	0	1	1	0	1	1	0	2	2	0	2	1	0	2	2	1	0	2	0	1	0	0
0	13	1	1	6	1	6	1	2	0	2	4	0	10	6	2	1	0	2	0	0	0	0	2	1	2	0	0	2	1	0	2	0	0	2	2	0	0	0	1
0	12	1	1	10	1	8	1	3	9	3	6	5	7	23	1	1	1	2	1	2	0	2	2	1	1	0	2	1	2	2	0	0	1	2	1	0	0	2	1
0	13	1	1	6	0	0	1	3	5	4	5	3	8	17	2	1	1	1	1	1	1	1	2	1	1	1	1	1	1	1	2	1	0	1	1	0	0	1	1
0	13	1	1	10	1	10	1	10	9	3	6	4	7	22	2	1	2	1	2	1	1	2	2	2	2	0	2	1	1	2	1	0	1	1	1	0	1	1	1
0	13	1	1	10	1	10	1	8	4	2	3	3	9	12	2	1	0	1	1	0	1	1	2	1	2	0	0	1	1	1	2	0	0	2	2	0	2	2	2
0	13	1	1	7	1	9	1	9	5	2	0	6	10	13	2	0	2	2	1	2	1	0	2	0	1	0	2	1	0	1	2	0	0	2	2	0	2	0	2
0	12	1	1	6	1	8	1	5	3	3	2	3	7	11	1	0	0	1	1	2	1	1	2	0	2	1	0	1	0	1	2	0	0	1	1	0	0	1	1
1	13	1	0	0	0	0	1	8	0	3	6	0	8	9	1	2	0	1	0	0	1	0	2	1	2	1	0	2	1	0	2	1	0	2	1	0	0	0	1
1	14	1	0	5	0	0	0	0	2	1	2	2	7	7	2	1	0	1	0	0	1	0	1	0	1	0	1	1	0	0	2	0	0	1	2	0	0	1	1
0	12	1	1	8	1	8	1	6	2	1	3	0	10	6	2	1	0	2	0	0	1	0	2	0	2	0	0	2	0	1	2	0	0	2	1	0	0	1	1
0	12	1	1	4	1	7	1	4	7	5	6	6	6	24	1	2	1	1	2	0	1	1	1	1	1	1	2	0	1	1	2	1	1	1	1	0	2	2	1
1	13	1	1	3	1	8	1	5	3	3	2	1	10	9	2	0	0	2	1	0	1	1	2	0	2	0	0	2	1	1	2	1	1	2	2	0	0	1	1
1	13	1	1	4	1	10	1	5	4	3	4	2	9	13	2	1	1	1	2	0	1	1	2	1	2	0	1	1	0	1	2	0	0	2	1	0	1	0	1
1	13	1	1	10	1	10	1	10	8	3	2	2	10	15	2	1	2	2	2	0	1	2	2	0	2	0	2	2	0	1	2	0	0	2	1	0	2	1	2
1	13	1	1	8	0	1	1	10	2	3	4	0	7	9	1	1	0	2	0	0	1	1	1	0	2	0	0	2	1	1	2	0	0	1	1	2	0	0	1
1	12	1	0	1	1	2	1	3	0	1	0	0	7	1	2	0	0	1	0	0	1	0	1	0	2	0	0	2	0	0	2	0	0	1	2	0	0	0	2
1	13	1	1	7	0	0	0	0	2	0	2	2	8	6	2	1	0	1	0	2	2	1	2	1	2	0	1	2	0	0	2	0	0	1	2	0	0	0	2
1	13	1	1	8	1	9	0	2	0	3	8	0	6	11	1	0	0	2	1	0	0	0	1	2	2	0	0	2	2	0	1	0	0	1	0	0	0	0	0
1	13	1	0	10	1	10	1	10	1	5	6	0	4	12	0	2	1	2	0	0	0	0	0	0	2	2	0	2	2	0	1	0	0	1	1	1	0	0	1
1	13	1	1	7	1	9	1	2	5	5	5	5	6	20	2	1	1	1	1	1	1	1	1	1	1	1	1	1	1	1	1	1	1	1	1	1	1	1	1
0	14	1	1	4	0	0	1	2	4	1	1	3	5	9	1	0	0	1	1	1	2	2	2	0	1	0	1	2	0	1	0	0	0	1	1	0	1	0	2
0	13	1	0	1	0	0	1	1	1	1	4	2	3	8	0	0	0	1	1	0	2	0	0	0	2	0	0	0	0	0	2	0	0	0	0	0	0	1	0
0	13	1	1	10	1	10	1	10	8	4	7	1	7	20	2	1	1	2	2	0	1	2	0	1	2	1	1	1	2	2	2	0	0	1	1	0	0	2	0
1	14	1	0	10	0	0	0	0	6	3	3	2	10	14	2	0	2	2	2	0	2	2	2	1	2	0	0	1	1	1	2	1	1	2	2	0	0	1	1
1	13	1	1	7	0	0	1	4	1	1	3	1	7	6	2	2	0	1	1	0	2	0	2	1	1	0	0	2	0	0	0	0	0	2	2	0	0	1	2
1	13	1	1	7	1	7	0	2	0	1	5	1	10	7	2	1	0	2	0	0	1	0	2	1	2	0	0	2	1	0	2	0	0	2	1	0	1	0	1
1	13	1	0	0	0	0	1	2	2	3	5	5	2	15	0	1	0	0	0	1	0	1	1	0	0	0	0	0	0	1	0	1	0	1	0	0	0	0	0
1	13	1	1	7	1	7	0	0	0	1	2	0	7	3	1	0	0	2	0	0	1	0	1	1	2	0	0	2	1	0	2	0	0	1	2	0	0	0	2
1	12	1	1	7	0	0	0	0	0	1	2	2	8	5	2	0	0	1	0	0	1	0	2	0	1	0	0	1	0	0	2	0	0	1	1	0	0	0	1
0	13	1	1	6	1	5	1	3	1	0	0	0	10	1	2	0	0	2	0	0	2	1	2	0	2	0	0	2	0	0	2	0	0	2	2	0	0	0	2
0	13	1	1	10	1	10	1	9	10	2	4	0	10	16	2	1	2	2	1	0	1	2	2	2	2	0	2	2	1	2	2	0	0	2	2	0	0	2	2
0	13	1	1	8	1	9	1	9	5	2	3	2	10	12	2	0	0	2	1	0	1	1	2	0	2	0	2	2	1	1	2	0	0	2	1	0	2	1	1
0	13	1	1	9	1	10	1	6	5	1	5	2	10	13	2	1	1	2	1	1	2	1	2	1	2	0	1	2	1	1	2	0	0	2	1	0	1	1	1
0	13	1	1	3	1	3	1	5	6	1	2	2	8	11	2	0	2	0	0	0	1	1	2	0	2	0	1	1	1	1	2	0	0	2	2	0	1	1	1
0	13	1	1	8	1	9	1	10	3	5	2	2	8	12	2	0	0	1	2	0	1	1	2	0	2	1	1	1	0	1	2	1	0	1	1	0	1	0	1
1	13	1	1	8	1	7	0	0	1	3	2	0	9	6	1	0	0	2	0	0	1	0	2	0	2	1	0	2	1	1	2	1	0	2	1	0	0	0	2
0	13	1	1	7	1	10	1	5	6	1	2	0	10	9	2	1	1	2	0	0	1	1	2	0	2	0	0	2	0	2	2	0	0	2	2	0	0	2	1
0	13	1	1	10	1	10	1	10	1	5	4	2	6	12	1	0	1	1	1	0	1	0	1	0	2	2	0	1	2	0	2	1	1	1	0	0	0	0	2
1	13	1	1	8	0	0	0	0	2	2	1	4	8	9	1	0	0	1	0	2	1	0	2	0	2	0	1	1	0	1	2	1	0	2	2	0	1	0	1
1	13	1	1	4	0	0	1	3	0	0	1	0	10	1	2	0	0	2	0	0	2	0	2	0	2	0	0	2	0	0	2	0	0	2	1	0	0	0	2
0	13	1	1	8	1	2	1	3	5	2	3	0	8	10	1	0	1	2	1	0	1	1	2	0	2	0	1	2	1	1	2	0	0	1	1	0	0	1	1
1	13	1	1	8	1	3	1	2	5	5	4	1	8	15	2	1	1	1	2	1	1	2	2	0	2	1	0	2	0	0	1	1	0	2	0	0	0	2	1
1	12	1	1	5	1	3	0	0	0	0	1	0	7	1	2	0	0	1	0	0	2	0	1	0	2	0	0	2	0	0	1	0	0	2	2	0	0	0	1
1	14	1	1	7	1	6	1	10	0	0	0	4	10	4	2	0	0	2	0	0	2	0	2	0	2	0	0	0	0	0	2	0	0	2	2	0	2	0	2
1	13	1	1	6	0	4	1	3	2	2	2	2	6	8	1	1	1	0	1	0	1	1	1	0	2	0	0	2	0	0	2	0	1	2	1	0	1	0	2
1	11	1	1	9	1	8	1	6	0	1	4	1	7	6	1	1	0	2	1	0	2	0	1	0	2	0	0	2	1	0	2	0	0	1	1	0	1	0	1
1	13	1	1	8	1	2	1	5	0	1	9	1	6	11	1	2	0	1	0	0	1	0	1	1	2	0	0	2	2	0	2	0	0	1	0	0	1	0	0
0	13	1	1	2	1	1	1	3	1	3	2	3	9	9	2	1	0	2	0	0	1	1	1	0	2	0	0	1	0	0	2	2	0	2	2	0	2	0	1
0	12	1	1	4	1	5	1	3	8	2	5	2	7	17	2	1	2	1	0	1	1	1	2	1	2	1	2	2	1	2	1	0	0	1	1	0	1	1	1
0	12	1	1	1	0	0	0	0	0	2	3	0	6	5	1	0	0	2	0	0	0	0	1	0	2	0	0	2	0	0	1	0	0	1	1	0	0	0	0
1	12	1	1	8	1	6	0	0	2	1	2	1	8	6	2	1	1	2	0	0	2	0	1	0	2	0	0	2	0	1	2	1	0	1	1	0	1	0	2
0	12	1	1	2	0	0	1	2	1	0	0	0	9	1	2	0	0	1	0	0	2	0	2	0	2	0	0	2	0	1	2	0	0	2	2	0	0	0	2
1	12	1	1	7	1	8	0	0	2	3	4	2	9	11	1	0	0	2	0	1	1	0	2	1	2	1	0	2	1	2	2	0	0	2	1	1	1	0	1
0	12	1	0	3	0	2	1	1	0	2	1	4	8	7	2	1	0	1	1	1	1	0	1	0	2	0	0	1	0	0	2	0	1	2	2	0	1	0	2
0	13	1	1	10	1	7	1	9	3	3	4	2	9	12	2	0	0	1	1	0	0	1	2	0	2	0	0	1	1	1	2	0	0	2	1	0	1	1	0
1	13	1	1	6	0	2	1	6	3	3	5	3	9	14	2	1	0	1	0	0	1	1	2	1	2	0	0	2	1	1	2	1	1	2	1	1	2	1	1
0	12	1	1	8	1	10	1	7	3	3	4	2	7	12	1	1	0	2	1	0	1	0	1	0	2	1	1	1	1	2	2	0	0	1	2	0	1	0	0
1	12	1	1	3	1	4	1	2	2	2	2	0	7	6	2	1	2	2	0	0	1	0	0	0	2	1	0	2	0	0	2	0	0	1	2	0	0	0	1
1	11	1	1	10	1	0	1	0	0	2	4	4	1	10	1	0	0	0	0	0	0	0	0	0	0	0	0	0	0	0	0	0	0	0	0	0	0	0	0
0	10	1	0	5	0	0	0	0	4	1	2	0	10	7	2	1	0	2	1	0	2	1	2	1	2	0	1	2	0	0	2	0	0	2	2	0	0	2	2
1	10	1	1	7	0	0	0	2	0	1	0	1	8	2	1	0	0	1	0	0	1	0	2	0	2	0	0	2	0	0	2	0	0	2	2	0	1	0	2
0	11	1	0	3	0	0	0	0	1	2	1	4	7	8	2	0	1	1	2	0	2	0	1	0	2	0	0	1	0	0	1	0	2	2	2	0	1	0	1
0	11	1	0	0	0	0	0	0	2	3	2	1	7	8	0	1	1	1	1	0	1	0	2	0	2	0	0	1	0	0	2	1	0	2	1	0	0	1	2
0	11	1	1	3	1	6	1	2	6	3	3	4	7	16	2	0	0	1	1	0	1	2	1	1	2	0	0	1	1	2	2	1	1	1	2	0	2	2	1
0	11	1	1	8	1	8	0	0	2	1	1	0	10	4	2	1	1	2	1	0	2	0	2	0	2	0	0	2	0	1	2	0	0	2	2	0	0	0	2
0	11	1	1	5	0	0	0	0	0	1	1	0	10	2	2	1	0	2	0	0	1	0	2	0	2	0	0	2	0	0	2	0	0	2	2	0	0	0	2
0	11	1	1	4	0	0	1	2	5	2	4	4	10	15	2	1	1	2	1	0	1	1	2	0	2	0	2	1	1	0	2	0	1	2	1	0	2	1	1
1	11	1	0	5	0	2	0	0	3	2	4	1	8	10	2	1	0	1	0	1	1	1	2	1	2	0	1	2	0	1	2	1	0	1	1	0	0	0	1
0	11	1	0	0	0	0	1	2	3	0	1	1	8	5	2	1	1	1	0	0	2	1	2	0	1	0	1	2	0	0	2	0	0	1	2	0	0	0	2
1	10	1	0	0	0	0	1	5	3	4	1	5	10	13	2	1	0	2	1	1	1	0	2	0	2	0	2	2	0	0	2	2	2	2	2	0	2	1	2
0	11	1	1	7	1	0	1	3	8	5	4	4	8	21	2	1	1	1	2	2	1	2	2	0	2	0	1	1	1	2	2	1	1	1	1	1	0	2	1
0	11	1	0	4	0	3	1	7	10	2	6	2	10	20	2	2	2	2	1	0	1	2	2	1	2	0	2	2	1	2	2	0	2	2	2	0	0	2	0
0	11	1	1	10	1	9	1	7	0	2	1	1	6	4	1	0	0	1	1	0	1	0	1	0	2	0	0	2	0	0	2	0	0	1	1	0	1	0	2
0	11	1	1	6	0	0	1	4	3	1	1	3	6	8	2	0	1	1	1	1	2	1	1	0	2	0	0	1	0	1	2	0	0	0	2	0	1	0	1
0	11	1	1	5	0	1	0	0	0	2	8	1	8	11	1	2	0	1	0	0	0	0	2	0	2	0	0	1	2	0	2	0	0	2	0	0	0	0	0
0	11	1	1	5	0	4	0	0	7	3	7	2	9	19	1	2	1	2	1	0	0	2	2	0	2	0	2	1	2	2	2	0	0	2	0	0	1	0	1
1	11	1	1	6	0	0	1	5	1	0	4	1	7	6	1	0	0	1	0	0	2	1	2	0	2	0	0	1	0	0	2	0	0	1	0	0	0	0	0
0	11	1	1	4	1	1	1	5	2	2	0	5	10	9	2	0	0	2	1	1	2	1	2	0	1	0	1	1	0	0	2	1	2	2	2	0	0	0	2
0	11	1	1	5	1	4	0	0	9	3	5	6	10	23	2	1	2	2	2	1	2	2	2	1	1	0	2	1	1	2	2	1	1	2	1	0	2	1	1
0	11	1	1	3	0	0	1	3	6	4	5	2	9	17	2	1	2	2	1	0	1	2	2	2	2	0	0	2	0	1	2	2	0	1	2	0	2	1	0
1	11	1	0	3	0	0	0	3	4	3	5	1	10	13	2	2	1	2	1	0	1	1	2	1	2	1	1	1	1	1	2	0	0	2	2	0	0	0	1
1	12	1	0	2	0	3	0	2	4	1	5	3	4	13	0	1	0	1	0	0	1	1	1	1	2	0	1	1	1	1	1	0	1	1	1	0	1	1	1
0	11	1	0	6	1	5	0	0	5	3	2	4	9	14	2	1	1	2	1	1	1	1	2	1	2	0	2	1	0	0	2	1	1	1	2	0	1	1	2
0	11	1	1	8	1	10	1	9	3	1	3	0	10	7	2	1	0	2	0	0	1	1	2	1	2	0	0	2	0	1	2	0	0	2	1	0	0	1	2
1	10	1	0	3	0	0	0	0	4	3	4	1	6	12	2	1	1	1	1	1	1	1	0	1	2	0	1	2	1	0	2	1	0	1	2	0	0	1	1
0	11	1	0	0	0	0	0	0	0	0	4	0	4	4	0	0	0	0	0	0	2	0	2	0	2	0	0	2	0	0	2	0	0	0	0	0	0	0	0
1	10	1	1	8	1	5	1	5	3	1	4	2	6	10	1	1	1	1	1	0	2	1	1	0	2	0	0	2	0	0	2	0	0	1	1	0	2	1	0
0	11	1	1	4	1	3	1	5	4	2	3	4	8	13	2	2	1	0	1	2	2	1	2	0	2	0	0	1	1	2	2	1	0	2	2	0	1	0	2
1	11	1	0	4	0	0	1	5	1	2	3	2	6	8	1	0	0	1	0	0	1	1	1	0	2	0	0	1	0	0	2	1	0	1	1	0	1	0	0
1	11	1	1	4	0	0	1	3	0	1	5	1	7	7	1	1	0	0	0	0	2	0	2	2	2	1	0	2	0	0	2	0	0	2	2	0	1	0	0
1	11	1	1	1	0	0	0	0	2	2	1	3	10	8	2	1	0	2	1	0	1	0	2	0	2	0	1	1	0	1	2	0	1	2	2	0	1	0	2
0	11	1	1	9	1	8	1	9	1	1	3	0	6	5	2	0	0	1	0	0	1	0	0	0	2	0	0	2	1	0	2	0	0	1	1	0	0	1	1
0	10	1	1	4	1	7	1	3	1	2	1	0	8	4	2	0	0	0	1	0	1	0	2	1	2	0	0	2	0	0	2	0	0	2	2	0	0	1	2
0	11	1	1	9	1	2	0	0	0	1	1	0	9	2	2	0	0	1	0	0	1	0	2	0	2	0	0	2	0	0	2	0	0	2	1	0	0	0	2
1	11	1	1	7	1	7	1	6	1	2	3	1	5	7	1	0	0	0	0	0	0	0	1	0	2	0	0	2	0	1	2	0	0	1	1	0	1	0	0
1	12	1	0	10	1	8	0	10	3	4	5	2	6	14	1	0	1	2	2	1	0	1	1	0	2	0	1	2	1	0	2	0	0	0	0	0	1	0	0
0	11	1	0	7	0	9	1	9	7	2	3	5	8	17	2	1	2	1	1	2	1	1	2	1	2	0	2	1	1	2	2	0	2	1	2	0	0	0	2
1	11	1	1	5	0	0	0	0	7	4	5	4	5	20	1	0	1	1	1	1	1	2	1	0	2	0	2	0	2	2	2	1	1	0	1	1	0	0	0
1	10	1	0	3	0	0	0	1	1	5	5	7	4	18	1	1	0	1	2	0	1	0	0	1	1	2	0	0	1	1	2	0	2	0	1	0	2	0	1
1	11	1	0	3	0	0	1	8	4	2	6	2	5	14	0	2	0	1	1	2	2	2	0	2	2	0	0	2	1	2	2	0	0	2	2	1	0	0	1
1	11	1	1	9	1	6	1	10	3	4	7	3	6	17	1	2	0	2	1	0	1	0	2	2	1	0	1	2	1	2	1	1	0	0	1	1	2	0	1
1	11	1	1	7	1	7	1	6	3	5	5	3	7	16	1	1	1	2	1	0	1	1	1	1	2	1	0	1	1	1	2	1	1	1	1	1	1	0	1
1	11	1	0	4	1	3	0	4	6	5	5	7	2	23	1	0	2	0	1	0	1	2	0	1	0	1	0	1	2	1	0	1	2	1	2	1	2	1	0
1	10	1	1	4	0	5	0	7	2	3	4	3	8	12	2	1	2	2	1	0	1	0	1	0	1	0	0	2	0	0	2	0	0	1	1	1	2	0	0
1	11	1	1	10	1	10	1	5	0	2	0	2	10	4	2	0	0	2	1	0	2	0	2	0	2	1	0	2	0	0	2	0	0	2	2	0	2	0	2
1	11	1	0	9	0	9	0	9	0	2	4	4	2	10	2	0	0	0	0	0	0	0	0	0	0	0	0	0	0	0	0	0	0	0	0	0	0	0	0
1	11	1	0	3	0	1	0	0	1	2	4	3	8	10	2	0	0	2	0	0	1	0	0	0	2	0	0	1	2	0	2	1	1	2	1	0	1	1	1
1	11	1	0	0	0	0	0	0	0	0	0	0	10	0	2	0	0	2	0	0	2	0	2	0	2	0	0	2	0	0	2	0	0	2	2	0	0	0	2
1	11	1	0	6	0	3	0	5	0	2	2	0	4	4	0	0	0	0	0	0	0	0	2	0	2	0	0	2	0	0	2	0	0	0	2	0	0	0	0
1	10	1	0	0	0	0	0	0	0	2	4	4	0	10	0	0	0	0	0	0	0	0	0	0	0	0	0	0	0	0	0	0	0	0	0	0	0	0	0
1	11	1	0	0	0	0	1	3	2	1	2	2	5	7	1	0	0	1	0	0	1	1	1	0	1	0	0	1	0	1	1	0	0	1	1	0	0	0	1
1	11	1	0	0	1	6	0	5	4	7	8	6	6	25	1	2	0	2	1	2	0	1	1	1	2	1	1	1	2	1	2	2	1	0	1	1	2	1	0
1	11	1	0	0	0	0	1	2	3	1	2	4	7	10	2	0	1	1	0	1	1	1	1	0	0	0	0	1	0	0	2	0	0	1	1	0	0	1	1
0	11	1	1	9	1	8	1	8	2	4	5	3	9	14	2	1	0	1	1	0	0	0	2	1	2	0	0	0	1	2	2	1	1	2	1	0	0	0	1
1	11	1	0	7	1	1	1	4	3	1	7	4	7	15	1	2	0	1	1	1	2	1	2	2	2	0	1	1	1	0	1	0	0	2	1	0	2	1	1
1	10	1	1	1	1	3	1	1	1	3	5	0	6	9	1	2	0	1	0	0	1	0	1	1	2	1	0	2	1	0	2	1	0	1	2	0	0	1	1
0	11	1	0	0	0	0	1	2	6	3	4	3	9	16	2	1	1	1	1	0	1	1	2	2	1	0	1	1	1	2	2	1	1	2	2	0	0	1	2
1	11	1	1	7	0	0	1	6	3	1	4	0	5	8	2	2	0	1	1	0	2	1	0	1	2	0	0	2	0	1	0	0	0	2	1	0	0	1	2
0	10	1	1	6	1	8	1	9	10	8	7	7	3	32	2	1	2	0	2	2	0	2	0	2	1	1	2	1	0	2	1	2	1	0	0	1	2	2	0
1	11	1	1	0	0	10	1	10	2	8	5	4	6	19	2	1	0	1	2	1	0	1	2	2	1	0	1	2	1	0	1	2	1	0	1	2	1	0	2
0	10	1	1	7	0	0	0	0	0	0	2	1	8	3	2	0	0	1	0	0	2	0	2	0	2	0	0	1	0	0	2	0	0	1	1	0	0	0	1
0	11	1	1	7	0	4	1	5	5	4	4	4	9	17	1	1	1	2	0	1	1	1	2	1	1	0	1	1	1	1	2	2	0	2	2	1	1	1	1
0	11	1	0	0	0	0	1	5	3	1	1	0	9	5	2	1	0	1	1	0	2	2	2	0	2	0	0	2	0	1	2	0	0	2	2	0	0	0	2
0	11	1	1	3	0	0	0	0	1	4	4	1	9	10	2	1	0	1	2	0	0	0	2	0	2	0	1	1	0	0	2	0	0	2	0	0	0	0	1
0	11	1	1	6	0	0	1	4	0	1	1	0	9	2	2	0	0	1	0	0	1	0	2	0	2	0	0	2	0	0	2	0	0	2	1	0	0	0	2
0	10	1	1	6	1	6	1	5	6	2	6	3	7	17	2	2	1	2	1	0	1	1	1	0	2	0	2	1	2	0	2	0	1	0	1	0	1	2	1
0	11	1	0	0	0	0	1	1	4	6	4	2	10	16	2	2	2	2	2	0	0	0	2	2	2	0	2	1	0	0	2	2	0	2	2	0	1	0	2
0	11	1	0	0	0	0	0	0	5	0	2	3	9	10	2	0	0	1	0	0	2	1	2	1	2	0	0	0	0	2	2	0	0	2	2	0	1	2	1
1	10	1	1	3	1	3	1	5	1	2	3	3	8	9	1	0	0	1	0	1	1	0	2	0	2	0	1	1	1	0	2	1	0	2	1	0	1	0	1
1	11	1	0	4	0	7	1	4	5	5	7	5	5	22	1	2	2	1	1	0	1	2	1	1	1	2	0	0	1	0	2	1	1	0	1	0	1	1	0
1	11	1	1	5	1	3	1	5	5	1	4	1	7	11	1	2	1	1	0	0	1	1	1	0	2	0	1	2	1	2	2	0	0	2	2	0	1	0	1
0	11	1	1	8	1	8	1	10	8	5	5	1	9	19	2	2	2	2	2	0	1	2	2	1	2	0	1	2	2	2	2	2	1	1	2	0	0	1	2
0	11	1	0	0	0	0	0	0	0	0	2	0	10	2	2	0	0	2	0	0	2	0	2	2	2	0	0	2	0	0	2	0	0	2	2	0	0	0	2
1	11	1	1	4	1	2	1	6	1	1	3	4	8	9	2	1	0	1	1	0	2	1	1	0	2	0	0	1	0	0	2	0	1	2	1	0	2	0	1
1	11	1	1	5	1	8	1	7	0	3	5	2	6	10	1	1	0	1	0	1	0	0	1	2	2	1	0	2	0	0	2	0	0	1	2	0	1	0	0
1	11	1	1	5	1	10	1	7	1	0	5	2	8	8	2	1	0	0	0	0	2	1	2	1	2	0	0	0	0	0	2	0	0	2	0	0	0	0	1
0	11	1	1	5	1	5	1	7	2	2	5	2	10	11	2	2	0	2	1	0	2	0	2	1	2	1	0	1	0	0	2	0	0	2	1	0	1	2	1
1	11	1	1	6	0	0	1	8	0	2	2	0	8	4	1	0	0	2	0	0	1	0	2	0	2	1	0	2	0	0	2	0	0	1	1	0	0	0	1
1	12	1	0	0	0	1	1	3	0	3	0	3	7	6	2	0	0	1	0	2	1	0	2	0	2	0	0	1	0	0	2	0	0	0	2	2	0	0	2
1	11	1	1	5	0	0	0	0	4	6	5	3	9	18	1	1	0	2	2	0	0	1	2	0	2	0	2	1	1	0	2	2	1	2	1	0	1	1	0
1	10	1	0	1	0	0	1	2	1	1	5	1	4	8	0	2	1	1	0	0	1	0	1	0	1	0	0	2	1	0	2	0	0	0	1	0	0	0	1
0	10	1	1	7	1	9	0	0	0	2	5	1	9	8	1	2	0	2	0	0	1	0	2	0	2	0	0	2	1	0	2	1	0	2	1	0	1	0	1
0	11	1	0	0	1	5	0	0	4	2	2	1	10	9	2	0	2	2	1	0	1	1	2	0	2	0	1	2	0	0	2	0	0	2	2	0	1	0	0
0	12	1	1	9	0	0	1	10	7	4	3	3	10	17	2	1	2	2	2	0	2	0	2	0	0	2	2	2	2	2	2	0	0	2	2	0	1	1	2
0	11	1	1	9	0	0	1	10	7	2	2	0	10	11	2	1	2	2	2	0	2	0	2	0	2	0	2	2	1	1	2	0	0	2	2	0	0	2	2
0	11	1	0	5	1	4	0	0	2	1	2	0	7	5	1	0	0	2	0	0	1	0	1	1	2	0	0	2	0	1	2	0	0	1	2	0	0	1	1
0	11	1	1	5	1	3	1	1	3	1	1	1	7	6	1	0	1	2	0	0	1	1	1	0	2	0	0	1	0	1	2	0	0	1	2	0	0	0	1
0	11	1	1	8	0	1	0	0	1	0	0	2	10	3	2	0	0	2	0	0	2	1	2	0	2	0	0	2	0	0	2	0	0	2	2	0	2	0	2
0	11	1	1	8	0	2	1	2	2	3	2	3	7	10	2	0	0	1	0	0	0	0	1	0	2	1	0	0	0	1	2	0	0	1	1	0	1	1	1
0	11	1	1	5	1	3	1	7	4	0	0	0	10	4	2	0	0	2	0	0	2	1	2	0	2	0	2	2	0	1	2	0	0	2	2	0	0	0	2
0	11	1	0	0	1	3	1	1	6	3	3	0	8	12	2	2	2	0	2	0	2	1	2	0	2	0	0	2	1	2	2	1	0	2	2	0	0	1	2
0	11	1	1	10	1	2	1	10	1	9	10	1	2	21	2	2	1	0	2	1	0	0	0	2	2	2	0	2	2	0	0	2	0	0	0	1	0	0	0
1	10	1	1	8	1	7	0	5	4	5	4	0	9	13	2	2	1	2	1	0	1	1	1	1	2	0	1	2	0	0	2	1	0	2	2	2	0	1	1
0	12	1	1	2	1	2	1	1	0	0	3	1	9	4	2	0	0	2	0	0	2	0	1	0	2	0	0	2	0	0	2	0	0	2	1	0	1	0	0
1	11	1	1	10	1	10	1	5	1	3	4	2	6	10	1	2	0	2	2	0	1	1	1	0	2	0	0	1	0	0	1	0	1	1	0	0	0	0	2
0	11	1	1	4	1	5	1	2	7	3	4	2	9	16	2	1	1	2	1	1	1	2	1	2	2	0	1	2	0	1	2	0	0	2	2	1	1	2	1
1	11	1	0	0	1	3	1	1	4	3	7	1	10	15	2	2	2	2	1	0	2	0	2	2	2	0	1	2	2	0	2	2	0	2	2	0	1	1	1
1	12	1	1	10	1	10	1	10	6	5	6	5	4	22	0	1	1	1	1	1	1	1	1	1	1	1	1	1	1	1	1	1	1	1	0	1	1	2	1
1	12	1	0	10	1	10	1	10	0	2	4	4	0	10	0	0	0	0	0	0	0	0	0	0	0	0	0	0	0	0	0	0	0	0	0	0	0	0	0
0	12	1	0	0	1	4	1	4	2	2	2	4	8	10	2	0	1	2	1	2	1	0	2	0	1	0	1	1	0	0	1	0	0	1	1	0	0	0	1
1	11	1	1	2	0	0	0	1	0	2	2	4	10	8	2	0	0	2	0	0	0	0	2	0	2	0	0	0	0	0	2	0	0	2	2	0	2	0	0
1	11	1	1	5	1	8	1	6	1	2	0	0	8	3	1	0	1	1	1	0	1	0	2	0	2	0	0	2	0	0	2	0	0	2	2	0	0	0	2
1	12	1	1	0	0	0	0	0	0	2	3	4	5	9	1	0	0	1	0	0	1	0	1	0	0	1	0	1	1	0	1	0	1	1	1	0	0	0	1
1	11	1	1	10	1	6	1	5	1	4	6	6	6	17	1	2	0	1	0	2	1	0	1	0	1	1	0	1	1	1	2	0	1	1	0	2	1	0	1
0	11	1	1	10	1	7	1	10	2	2	5	1	7	10	1	2	0	2	1	0	1	1	1	0	2	0	1	2	0	0	2	0	0	1	1	0	1	0	0
1	12	1	0	0	0	0	1	1	0	3	5	0	5	8	1	1	0	1	1	0	1	0	1	0	2	1	0	2	1	0	1	0	0	1	0	0	0	0	1
1	12	1	1	8	1	8	1	7	0	1	5	0	6	6	1	1	0	1	0	0	1	0	1	0	2	0	0	2	1	0	2	0	0	1	0	0	0	0	1
0	11	1	1	1	1	2	0	0	0	1	2	1	6	4	2	0	0	2	0	0	1	0	1	0	2	0	0	1	0	0	0	0	0	1	1	0	0	0	1
1	11	1	1	6	1	6	1	7	0	0	0	1	7	1	0	0	0	1	0	1	2	0	2	0	2	0	0	2	0	0	2	0	0	2	2	0	0	0	2
0	13	1	0	3	0	1	0	0	5	3	8	3	6	19	1	2	2	1	2	1	1	1	2	2	2	0	0	1	2	2	1	0	0	1	1	0	1	0	1
1	12	1	0	1	0	0	1	7	0	2	4	3	3	9	0	0	0	1	0	2	1	0	0	0	2	0	0	1	1	0	1	0	0	1	0	1	0	0	1
1	12	1	0	0	0	0	1	4	0	2	5	2	4	9	1	1	0	0	0	0	0	0	1	0	2	0	0	2	0	0	2	0	0	0	0	0	2	0	0
0	12	1	1	8	1	6	1	4	9	6	7	3	8	25	1	2	1	1	2	1	1	2	2	1	2	1	2	1	2	2	2	1	1	2	1	1	0	2	1
0	12	1	1	2	0	0	1	1	6	3	2	8	7	19	2	0	1	1	1	1	1	1	1	1	0	0	2	0	0	1	2	1	1	1	1	0	2	1	2
1	13	1	1	8	1	7	1	10	4	2	2	2	9	10	2	1	1	2	0	1	2	1	2	0	2	0	1	2	0	1	1	1	0	2	2	1	1	0	1
0	12	1	0	0	0	0	0	0	0	2	0	4	9	6	2	0	0	1	0	0	1	0	2	0	2	0	0	1	0	0	2	0	2	2	2	1	1	0	2
0	12	1	1	8	1	5	1	5	6	2	3	1	10	12	2	0	0	2	1	0	1	2	2	1	2	0	1	2	0	1	2	0	0	2	1	0	1	2	1
0	12	1	0	0	0	0	0	0	2	1	4	0	10	7	2	1	0	2	1	0	2	0	2	1	2	0	0	2	0	0	2	0	0	2	1	0	0	2	1
1	13	1	1	4	0	2	1	5	2	2	7	1	10	12	2	2	1	2	0	0	0	0	2	2	2	0	0	2	2	1	2	0	0	2	2	0	1	0	1
0	12	1	0	0	0	0	0	0	2	2	2	0	8	6	2	0	0	1	0	0	1	0	1	1	2	1	1	2	0	1	2	0	0	2	2	0	0	0	1
0	12	1	1	7	1	6	1	5	1	4	5	1	8	11	2	1	0	2	1	0	0	1	1	1	2	1	0	2	0	0	2	0	0	1	0	0	1	0	1
0	12	1	1	7	0	1	1	3	2	2	3	0	7	7	2	1	0	1	1	0	1	0	1	0	2	0	0	2	1	1	2	0	0	1	2	0	0	1	1
1	11	1	1	10	1	7	1	9	1	3	4	1	5	9	1	0	1	0	0	0	1	0	2	1	2	1	0	1	1	0	2	1	0	0	1	0	0	0	1
1	12	1	1	6	1	6	1	6	0	3	0	1	10	4	2	0	0	2	0	0	1	0	2	0	2	0	0	1	0	0	2	2	0	2	2	0	0	0	2
0	12	1	1	7	1	7	1	8	0	3	7	1	8	11	1	1	0	2	1	0	1	0	1	1	2	1	0	2	1	0	2	0	0	2	0	0	1	0	0
1	12	1	1	8	0	0	0	0	1	2	0	4	9	7	1	0	0	2	0	0	2	0	2	0	0	0	0	2	0	0	2	2	0	2	2	0	2	1	2
0	12	1	1	10	1	10	1	5	3	0	1	2	10	6	2	0	1	2	0	0	2	1	2	1	2	0	0	2	0	0	2	0	0	2	2	0	2	1	2
1	12	1	1	10	1	7	1	7	3	2	0	1	8	6	2	0	1	2	0	0	2	0	0	0	2	2	1	2	0	1	2	0	0	2	2	0	1	0	2
1	13	1	1	6	1	7	0	0	2	1	5	1	6	9	2	1	0	2	0	1	1	0	1	0	2	0	0	2	2	2	0	0	0	1	1	0	0	0	1
0	13	1	1	10	0	0	0	0	1	0	0	0	10	1	2	0	0	2	0	0	2	0	2	0	2	0	0	2	0	0	2	0	0	2	2	0	0	1	2
0	13	1	1	7	1	8	1	8	1	2	3	5	7	11	2	0	0	1	1	0	1	1	1	0	2	0	0	1	1	0	2	0	2	1	1	0	2	0	1
1	13	1	0	0	1	4	1	2	3	0	0	1	9	4	2	0	0	2	0	1	2	1	2	0	2	0	0	2	0	1	2	0	0	1	2	0	0	1	2
0	12	1	1	9	1	6	1	10	5	3	3	3	8	14	2	1	1	1	1	1	1	1	2	1	1	1	1	2	0	2	1	0	0	2	2	0	1	0	1
1	13	1	0	2	0	0	0	0	0	1	3	3	5	7	1	0	0	1	0	0	1	0	1	0	1	0	0	0	0	0	1	0	0	1	1	0	0	0	0
0	13	1	1	8	1	6	0	0	5	5	2	5	7	17	2	1	2	1	2	1	1	1	1	0	0	1	2	1	0	0	1	0	0	2	2	1	1	0	1
0	13	1	1	5	1	5	1	3	5	2	2	2	7	11	2	0	0	1	1	1	1	1	1	0	2	0	1	1	0	2	2	0	0	1	1	0	0	1	1
1	12	1	1	3	1	3	1	10	4	3	3	2	5	12	1	1	1	1	2	0	1	1	2	0	1	0	1	1	0	1	0	0	0	1	1	0	0	0	1
1	13	1	0	0	0	0	0	0	0	1	0	0	10	1	2	0	0	2	0	0	1	0	2	0	2	0	0	2	0	0	2	0	0	2	2	0	0	0	2
1	14	1	0	0	0	0	1	3	1	2	2	4	5	9	1	0	0	0	0	1	1	0	1	0	2	0	0	1	0	1	2	1	1	1	1	0	1	0	1
0	13	1	0	7	1	8	1	6	1	2	5	0	8	8	2	2	0	1	1	0	1	1	2	1	2	0	0	2	0	0	2	0	0	1	1	0	0	0	1
1	14	1	1	10	1	10	1	10	4	7	2	5	1	18	1	0	1	0	1	1	1	1	0	0	0	2	1	1	1	0	0	2	0	0	2	1	1	1	1
0	12	1	1	9	1	7	0	4	6	5	7	6	8	24	1	1	2	2	2	1	1	2	1	1	0	0	1	1	2	1	2	2	1	2	1	0	1	0	0
1	12	1	1	1	1	1	1	5	4	5	6	4	6	19	1	2	0	1	1	0	1	1	2	1	1	0	1	2	1	1	2	2	2	0	1	1	1	1	1
1	11	1	1	7	0	0	1	2	0	5	2	0	9	7	1	0	0	2	1	0	1	0	2	0	2	0	0	2	0	0	2	2	0	2	1	1	0	0	1
1	11	1	1	6	0	2	1	4	2	1	5	2	9	10	2	2	0	2	0	0	1	0	1	0	2	0	0	2	1	2	2	0	0	2	1	0	2	0	1
1	11	1	1	3	0	0	1	3	0	0	2	0	10	2	2	1	0	2	0	0	2	0	2	0	2	0	0	2	1	0	2	0	0	2	2	0	0	0	2
0	11	1	1	9	0	1	1	10	0	1	2	0	8	3	2	1	0	1	1	0	2	0	1	0	2	0	0	2	0	0	2	0	0	2	2	0	0	0	1
0	11	1	1	8	0	1	1	10	7	2	6	4	6	19	1	1	1	2	1	0	2	2	1	1	2	0	1	0	1	2	0	0	0	2	1	1	2	1	0
0	11	1	1	3	0	0	0	0	2	1	3	1	8	7	2	1	0	1	0	0	1	0	2	0	2	0	0	2	1	2	2	0	0	1	2	0	1	0	1
0	11	1	0	0	1	4	1	5	3	1	1	2	8	7	2	0	0	1	0	0	1	0	2	0	2	0	1	2	1	1	2	0	0	1	2	0	2	1	2
0	11	1	0	0	1	3	1	4	3	0	0	2	7	5	2	0	0	2	0	0	2	0	2	0	2	0	2	2	0	0	0	0	0	1	2	0	2	1	2
1	11	1	1	4	1	6	1	4	6	2	3	3	9	14	2	0	1	1	0	0	0	2	2	1	2	0	1	1	0	1	2	0	0	2	1	0	2	1	1
0	11	1	0	0	1	3	1	4	3	0	0	2	7	5	2	0	0	2	0	0	2	0	2	0	2	0	2	2	0	0	0	0	0	1	2	0	2	1	2
0	11	1	0	0	0	0	0	0	0	1	0	3	10	4	2	0	0	2	0	1	1	0	2	0	0	0	0	2	0	0	2	0	0	2	2	0	0	0	2
1	10	1	0	0	0	0	0	0	2	0	3	2	10	7	2	1	0	2	0	0	2	1	2	0	2	0	0	2	1	1	2	0	1	2	2	0	1	0	1
0	10	1	1	10	1	10	0	0	6	4	2	2	10	14	2	1	1	2	2	0	1	2	2	0	2	0	2	2	1	0	2	1	0	2	2	0	2	1	2
0	10	1	1	10	1	10	1	6	7	3	5	1	7	16	1	1	1	2	1	0	1	2	1	0	2	0	2	2	2	1	2	1	0	1	1	0	1	1	1
1	10	1	1	5	0	3	0	0	0	0	1	3	10	4	2	1	0	2	0	0	2	0	2	0	2	0	0	2	0	0	2	0	1	2	2	0	2	0	2
1	10	1	1	10	1	10	1	10	5	2	5	5	5	17	2	1	0	0	1	0	1	2	1	0	1	0	2	1	2	0	2	0	1	0	1	0	2	1	1
0	11	1	1	8	0	0	1	4	2	1	6	0	8	9	2	1	0	2	0	0	1	0	1	2	2	0	0	2	1	1	2	0	0	1	1	0	0	1	1
1	10	1	1	10	1	10	1	10	5	2	5	5	5	17	2	1	0	0	1	0	1	2	1	0	1	0	2	1	2	0	2	0	1	0	1	0	2	1	1
1	11	1	0	0	1	5	0	0	5	1	5	3	9	14	2	2	0	1	0	0	2	1	2	2	2	0	2	2	0	1	2	1	1	2	2	0	2	1	1
1	11	1	1	4	1	7	1	9	0	4	5	2	2	11	0	2	0	1	1	0	0	0	0	0	1	1	0	1	1	0	1	0	0	0	1	0	0	0	1
1	11	1	1	7	0	4	0	3	1	1	4	1	7	7	1	1	0	2	0	0	1	1	1	0	2	0	0	1	1	0	2	0	0	1	1	0	0	0	1
1	11	1	1	7	0	0	0	0	0	4	6	2	7	12	1	2	0	2	0	1	1	0	1	0	2	0	0	2	1	0	2	1	0	1	0	2	1	0	1
0	11	1	0	3	1	4	1	4	6	3	7	0	10	16	2	2	1	2	1	0	1	2	2	1	2	0	0	2	1	1	2	1	0	2	1	0	0	2	0
1	11	1	0	6	1	10	1	8	7	3	7	4	10	21	2	1	2	2	1	0	1	2	2	1	1	0	1	2	2	1	2	1	1	2	1	0	2	1	0
1	10	1	0	3	0	0	0	0	1	1	3	0	9	5	2	1	0	2	0	0	1	0	2	0	2	0	0	2	0	1	2	0	0	1	1	0	0	0	1
1	11	1	0	4	1	5	0	5	2	1	0	0	10	3	2	0	2	2	0	0	1	0	2	0	2	0	0	2	0	0	2	0	0	2	2	0	0	0	2
0	11	1	1	7	1	6	0	0	2	0	4	0	8	6	2	0	0	2	0	0	2	0	2	0	2	0	0	2	0	1	0	0	0	2	0	0	0	1	0
1	11	1	1	7	1	4	1	10	6	2	1	3	7	12	2	0	2	1	1	0	1	2	1	0	1	0	1	2	0	1	2	0	1	1	1	0	1	0	2
0	11	1	0	0	0	0	0	0	7	0	3	1	10	11	2	0	1	2	0	0	2	1	2	0	2	0	2	2	1	1	2	0	0	2	0	0	1	2	2
0	11	1	0	10	1	10	1	10	1	3	4	0	3	8	0	0	0	0	0	0	1	0	0	0	2	1	0	2	0	1	2	1	0	1	0	0	0	0	0
1	11	1	1	10	0	5	1	8	0	3	4	1	5	8	1	2	0	1	0	0	1	0	1	1	2	1	0	2	0	0	1	1	0	1	1	0	1	0	2
1	11	1	1	6	0	3	1	7	1	1	5	2	9	9	2	2	0	1	0	0	1	0	2	2	2	0	0	2	1	1	2	0	0	2	2	0	2	0	2
1	11	1	1	6	0	0	0	0	2	1	4	0	10	7	2	1	0	2	1	0	2	1	2	0	2	0	0	2	0	1	2	0	0	2	0	0	0	0	1
1	11	1	1	9	1	10	0	6	2	2	6	2	8	12	2	2	0	1	0	0	1	1	1	1	2	1	0	2	1	1	2	0	0	2	1	0	2	0	1
0	11	1	1	9	1	6	1	9	4	3	3	4	9	14	2	0	2	2	1	1	0	1	2	1	2	0	1	1	0	0	2	0	0	1	1	0	2	0	1
1	11	1	0	7	0	0	1	4	0	1	3	0	9	4	2	1	0	1	0	0	1	0	2	0	2	0	0	2	1	0	2	0	0	2	2	0	0	0	1
0	11	1	1	2	0	0	0	0	3	2	2	0	10	7	2	0	0	2	1	0	1	1	2	1	2	0	0	2	0	1	2	0	0	2	1	0	0	1	2
1	11	1	0	0	1	0	0	0	1	1	0	2	7	4	2	0	0	2	1	0	2	0	0	0	2	0	0	2	0	1	2	0	0	1	2	0	2	0	2
1	11	1	0	0	1	2	1	1	4	1	3	3	7	11	2	0	1	1	1	0	2	1	1	1	2	0	0	1	0	1	2	0	0	1	1	0	2	1	1
1	11	1	1	7	0	6	0	0	6	4	5	3	7	18	2	2	1	1	1	1	1	2	1	1	2	1	1	2	1	1	2	1	1	1	2	0	1	1	1
0	11	1	0	2	0	0	0	0	10	4	6	3	10	23	2	1	2	2	2	1	2	2	2	2	2	0	2	2	1	2	2	2	2	2	1	0	0	2	1
0	10	1	1	8	1	5	1	6	6	3	7	9	9	25	2	2	0	2	2	2	1	2	2	2	1	0	1	0	1	2	2	0	2	1	1	0	2	1	1
0	11	1	1	6	0	0	0	0	2	0	1	0	10	3	2	0	1	2	0	0	2	1	2	0	2	0	0	2	0	0	2	0	0	2	2	0	0	0	1
1	11	1	1	7	1	5	1	8	1	3	2	3	7	9	1	0	0	2	0	1	1	0	1	1	2	0	1	2	0	0	2	2	0	1	2	0	2	0	1
0	11	1	1	7	1	5	1	3	0	0	0	0	10	0	2	0	0	2	0	0	2	0	2	0	2	0	0	2	0	0	2	0	0	2	2	0	0	0	2
0	11	1	1	6	0	2	0	0	0	0	2	0	10	2	2	0	0	2	0	0	2	0	2	0	2	0	0	2	0	0	2	0	0	2	2	0	0	0	0
1	11	1	1	10	0	0	0	0	1	1	3	0	8	5	1	1	0	2	0	0	1	1	2	0	2	0	0	2	0	0	2	0	0	1	1	0	0	0	1
0	11	1	0	4	0	4	0	2	4	7	4	5	8	20	2	1	2	2	2	2	1	1	2	2	1	2	0	2	1	0	2	1	2	0	2	1	0	1	2
0	11	1	1	9	1	9	1	9	6	4	6	4	10	20	2	1	2	2	2	2	1	1	2	1	2	0	1	2	2	1	2	1	0	2	1	0	2	1	1
1	11	1	1	9	0	0	1	8	2	3	7	0	8	12	2	2	0	1	1	0	1	1	2	1	2	1	0	2	1	0	2	0	0	1	0	0	0	1	1
1	11	1	1	9	0	0	1	9	7	4	6	0	8	17	2	2	2	1	2	0	1	2	2	1	2	1	2	2	2	0	2	0	0	1	2	0	0	1	1
1	11	1	1	9	1	6	1	1	5	4	5	5	10	19	2	1	1	2	1	1	1	2	2	1	2	1	1	1	1	1	2	0	2	2	1	1	1	0	1
0	10	1	0	0	1	6	1	5	8	2	3	2	9	15	2	1	2	2	1	0	1	1	2	1	2	0	1	2	1	2	2	0	1	1	2	0	1	2	2
0	11	1	0	7	0	10	0	0	1	3	0	0	5	4	1	0	0	0	0	0	1	0	2	0	2	0	0	2	0	0	0	0	0	2	2	2	0	1	2
0	11	1	0	7	0	10	0	0	1	3	0	0	5	4	1	0	0	0	0	0	1	0	2	0	2	0	0	2	0	0	0	0	0	2	2	2	0	1	2
0	11	1	1	8	1	2	0	0	2	3	3	2	5	10	1	1	1	1	0	0	1	1	1	0	2	0	0	2	1	0	1	0	0	1	2	2	2	0	1
1	10	1	1	5	0	0	0	0	6	4	4	3	9	17	2	2	0	1	1	1	1	2	2	1	2	0	0	1	1	2	2	1	1	2	2	1	0	2	2
0	11	1	1	2	0	0	1	1	7	2	5	1	7	15	1	1	1	2	1	0	1	2	1	0	2	0	2	2	1	1	2	0	0	1	0	0	1	1	1
0	11	1	1	10	1	9	1	3	4	4	5	0	5	13	1	2	2	2	1	0	0	1	2	0	2	1	0	2	0	1	0	0	0	0	0	0	0	0	1
0	11	1	1	3	1	5	1	2	3	3	4	1	8	11	2	1	1	1	1	0	0	1	2	0	2	0	1	2	0	0	2	0	1	1	1	0	0	0	0
1	11	1	0	1	1	10	0	0	3	2	5	4	10	14	2	2	1	2	0	2	1	2	2	0	2	1	0	2	2	0	2	0	0	2	1	0	2	0	2
1	12	1	1	10	1	5	1	1	3	3	4	1	7	11	2	1	2	1	1	0	2	1	1	1	1	0	0	2	0	0	1	2	0	2	1	0	0	0	1
1	11	1	1	10	1	8	1	1	4	4	5	2	9	15	2	1	1	1	1	0	1	2	2	1	2	0	1	2	1	0	2	2	0	2	1	0	2	0	1
1	10	1	0	0	0	0	1	6	5	3	2	1	9	11	2	1	2	2	2	0	1	1	2	1	2	0	1	1	0	1	2	0	0	1	2	0	0	0	2
1	11	1	1	8	0	0	0	0	8	4	5	3	8	20	2	1	0	1	2	2	2	2	2	2	2	0	2	1	2	2	2	2	0	1	2	0	0	2	2
0	11	1	0	7	1	7	0	7	3	7	4	4	4	18	1	1	0	1	1	0	0	1	2	1	2	0	1	1	1	1	0	2	2	0	1	2	1	0	2
0	11	1	1	2	1	5	1	1	5	6	4	3	8	18	1	1	2	1	2	0	1	2	2	0	1	1	0	2	1	0	2	1	1	2	1	1	1	1	1
1	11	1	1	3	1	1	1	2	0	3	3	1	8	7	2	1	0	1	1	0	1	0	2	1	2	0	0	2	0	0	2	0	0	1	2	1	1	0	1
1	13	1	0	1	1	6	0	0	0	2	0	0	9	2	2	0	0	2	0	0	1	0	2	0	2	0	0	2	0	0	2	1	0	1	2	0	0	0	2
0	13	1	1	8	0	2	1	5	7	2	5	1	6	15	1	2	2	1	1	1	1	2	2	1	2	0	1	2	1	1	1	0	0	1	2	0	0	1	1
0	13	1	1	8	1	5	0	0	2	1	5	3	8	11	2	0	0	1	0	1	1	0	2	0	2	0	0	1	1	1	2	0	0	1	0	0	1	1	0
1	13	1	0	0	1	2	1	1	0	1	4	1	6	6	1	0	0	1	0	0	1	0	1	1	2	0	0	1	1	0	2	0	0	1	1	0	0	0	1
1	13	1	0	0	0	0	0	0	0	2	4	1	4	7	1	0	0	1	0	0	0	0	1	0	2	0	0	1	0	0	0	0	0	1	0	0	0	0	0
1	13	1	1	3	0	0	0	0	3	1	5	2	4	11	1	1	2	1	0	0	1	0	1	0	1	0	0	1	2	0	1	0	0	0	1	0	0	1	1
0	13	1	1	3	0	0	0	0	1	2	0	0	7	3	1	0	0	2	0	0	0	0	1	0	2	0	0	2	0	0	2	0	0	1	2	0	0	1	2
0	13	1	1	10	1	10	1	4	2	4	4	2	4	12	1	0	0	0	2	1	0	1	1	0	1	0	0	2	2	1	1	0	0	1	2	0	0	0	0
0	13	1	1	7	0	5	1	6	2	2	6	2	4	12	1	2	0	1	0	0	0	1	1	1	2	0	0	1	1	1	1	0	0	0	1	0	1	0	1
0	13	1	1	4	0	0	1	3	8	5	4	3	10	20	2	1	0	2	2	1	0	2	2	2	1	1	2	1	0	2	2	0	0	2	2	0	0	2	1
0	13	1	1	1	0	0	1	2	4	1	3	1	9	9	2	0	1	2	1	0	2	2	1	1	2	0	0	2	0	1	2	0	0	2	1	0	1	0	1
0	13	1	1	3	1	2	0	0	1	2	0	0	10	3	2	0	0	2	1	0	1	1	2	0	2	0	0	2	0	0	2	0	0	2	2	0	0	0	2
0	13	1	1	7	1	6	1	2	6	4	5	7	8	22	1	1	1	1	2	2	1	1	2	1	1	0	2	1	1	1	2	1	1	2	1	0	2	1	1
0	11	1	0	2	0	0	0	0	3	1	5	2	8	11	2	1	2	2	0	1	2	0	1	1	2	0	0	2	1	0	2	1	0	1	1	0	1	1	1
1	12	1	1	9	0	0	0	0	3	2	2	0	8	7	2	1	2	1	1	0	1	1	2	1	2	0	0	2	0	0	2	0	0	1	2	0	0	0	2
0	13	1	1	8	1	7	0	0	6	3	5	4	10	18	2	0	2	2	1	1	0	1	2	0	0	0	1	1	2	1	2	0	0	2	0	0	0	1	1
1	12	1	0	0	1	7	0	0	1	1	5	0	10	7	2	2	0	2	0	0	2	0	2	1	2	0	0	2	0	1	2	1	0	2	1	0	0	0	1
1	11	1	1	10	1	10	1	10	0	2	4	2	5	8	0	1	0	0	0	0	0	0	1	0	2	0	0	2	0	0	2	0	0	2	0	0	2	0	1
0	12	1	1	3	0	1	0	1	2	2	2	0	8	6	2	1	0	1	1	0	1	1	2	0	2	0	1	2	0	0	2	0	0	1	1	0	0	0	2
1	12	1	1	3	0	0	1	6	4	0	2	4	10	10	2	1	0	2	0	1	2	1	2	1	2	0	1	1	0	2	2	0	1	2	2	0	1	0	2
0	13	1	1	8	1	9	1	8	5	7	1	2	6	15	1	0	1	0	1	0	0	1	2	1	2	1	1	2	0	1	2	2	0	1	2	1	2	1	2
0	13	1	1	10	0	0	0	0	3	2	1	4	8	10	1	0	1	2	0	1	0	0	2	0	2	0	0	1	0	2	2	0	0	1	2	0	2	0	1
0	13	1	1	3	0	0	1	3	0	2	0	2	9	4	2	0	0	2	1	0	1	0	2	0	2	0	0	2	0	0	2	0	2	1	2	0	0	0	2
0	13	1	1	7	0	0	0	0	1	3	5	2	8	11	2	1	0	1	0	1	0	1	2	0	2	0	0	2	1	0	2	0	0	1	1	1	1	0	0
0	13	1	1	8	1	6	1	5	3	2	4	0	9	9	2	1	1	2	1	0	1	1	2	0	2	0	0	2	1	1	2	0	0	1	1	0	0	0	1
1	11	1	1	7	0	0	0	0	0	3	0	2	10	5	2	0	0	2	0	0	0	0	2	0	2	0	0	2	0	0	2	1	0	2	2	0	2	0	2
0	12	1	1	8	0	0	1	2	4	0	1	0	9	5	2	0	1	1	0	0	2	1	2	0	2	0	0	2	1	1	2	0	0	2	2	0	0	1	2
0	13	1	1	9	1	10	1	7	6	7	10	1	6	24	1	2	1	1	2	0	0	1	1	2	1	1	1	2	2	2	2	2	0	1	0	0	0	1	0
1	12	1	1	10	1	8	1	7	3	3	2	0	10	8	2	2	0	2	0	0	1	0	2	0	2	0	0	2	0	2	2	2	0	2	2	0	0	1	2
0	13	1	1	9	1	10	1	6	4	6	7	5	5	22	1	2	0	1	1	0	0	2	1	0	1	1	1	0	1	0	1	0	0	1	0	2	2	1	0
0	12	1	1	2	1	7	1	5	2	4	6	1	10	13	2	1	1	2	1	0	0	0	2	1	2	0	0	2	2	1	2	1	0	2	1	0	1	0	1
1	12	1	1	3	1	5	1	3	1	3	3	0	9	7	2	1	1	2	1	0	1	0	2	1	2	0	0	2	0	0	2	1	0	1	2	0	0	0	1
0	12	1	0	3	1	8	1	9	1	2	7	1	6	11	1	1	0	1	1	0	1	0	1	2	2	0	0	1	1	0	2	0	0	1	0	0	0	1	1
0	12	1	1	7	1	5	1	10	4	2	5	3	10	14	2	1	2	2	0	0	0	1	2	1	2	0	0	2	1	0	2	0	1	2	1	0	2	1	1
1	12	1	1	7	1	2	0	10	2	1	3	0	9	6	2	1	0	2	0	0	1	1	2	0	2	0	1	2	0	0	2	0	0	1	1	0	0	0	1
1	13	1	0	2	0	0	1	1	1	1	5	5	5	12	1	1	0	0	0	2	1	0	2	1	2	0	0	1	1	1	2	0	1	0	1	0	1	0	1
1	12	1	1	7	0	3	1	5	1	2	3	1	6	7	1	0	0	1	0	0	1	0	1	0	2	0	0	2	1	1	2	1	1	1	1	0	0	0	1
0	12	1	1	3	1	8	1	10	3	3	5	0	9	11	2	2	2	2	1	0	1	1	1	1	2	1	0	2	1	0	2	0	0	2	1	0	0	0	2
1	13	1	1	4	1	2	1	1	1	5	6	1	8	13	1	1	0	1	1	1	0	0	2	2	2	0	0	2	2	1	2	2	0	2	1	0	0	0	2
1	12	1	0	0	0	0	0	0	0	1	2	0	9	3	1	0	0	2	0	0	1	0	2	0	2	0	0	2	0	0	2	0	0	2	1	0	0	0	1
0	12	1	0	5	0	5	0	0	3	3	4	3	10	13	2	1	1	2	0	0	1	2	2	2	2	1	0	1	0	0	2	1	1	2	2	0	1	0	1
0	13	1	1	7	1	8	1	9	7	4	3	5	8	19	1	1	2	1	2	0	1	2	2	2	1	1	1	1	0	1	2	0	1	2	2	0	2	1	2
1	13	1	0	3	0	2	1	5	0	1	1	0	9	2	2	0	0	2	0	0	1	0	2	0	2	0	0	2	0	0	2	0	0	1	2	0	0	0	1
1	13	1	0	1	0	0	0	0	0	1	0	0	8	1	0	0	0	2	0	0	1	0	2	0	2	0	0	2	0	0	2	0	0	2	2	0	0	0	2
0	13	1	1	6	1	5	1	6	7	3	0	2	10	12	2	0	1	2	0	1	1	1	2	0	2	1	2	2	0	2	2	1	1	2	2	0	0	1	2
1	12	1	1	3	0	0	1	2	4	5	6	2	9	17	2	2	0	1	2	0	1	2	2	1	2	0	0	2	1	1	2	1	1	2	1	1	1	1	1
1	12	1	1	6	0	2	0	0	7	2	5	1	6	15	1	2	2	1	1	0	1	2	1	1	2	0	1	1	0	1	2	0	0	1	1	0	0	1	1
1	13	1	1	7	0	3	0	2	0	3	3	0	7	6	1	1	0	1	1	0	1	0	2	0	2	0	0	2	0	0	2	0	0	1	1	1	0	0	1
1	13	1	1	3	0	0	1	1	2	3	1	1	8	7	1	0	0	2	1	0	1	1	1	0	2	0	0	2	0	1	2	1	0	2	1	0	1	0	2
0	13	1	1	7	1	10	0	0	2	3	1	3	10	9	2	0	0	2	1	0	2	1	2	0	1	0	0	1	0	1	2	2	0	2	1	0	1	0	2
1	13	1	1	8	0	0	1	3	1	2	2	2	7	7	1	0	0	1	1	0	1	0	2	0	1	0	0	2	0	1	2	0	0	1	1	0	1	0	1
1	13	1	1	8	0	0	0	0	2	3	5	1	8	11	1	1	0	1	0	0	0	1	2	1	2	0	0	2	1	1	2	1	0	2	1	0	1	0	1
0	13	1	1	7	1	6	1	7	7	6	7	3	8	23	1	1	1	2	1	0	0	2	2	2	2	1	1	1	2	2	2	1	0	1	2	1	2	1	0
0	13	1	1	6	1	5	1	5	3	6	6	4	9	19	1	1	0	2	2	1	1	1	2	1	2	1	0	1	2	1	2	1	0	2	2	1	2	1	0
1	13	1	1	6	0	0	1	7	5	6	6	2	5	19	1	2	1	2	2	0	1	2	1	1	2	2	0	2	1	1	0	1	0	1	1	0	2	1	1
1	14	1	1	7	0	5	1	6	5	3	7	4	7	19	2	0	0	2	1	0	0	1	1	1	2	0	2	2	2	2	1	0	2	1	0	0	2	0	0
0	13	1	0	1	1	2	1	2	0	2	2	0	5	4	1	1	0	1	1	0	1	0	1	0	2	0	0	2	0	0	2	0	0	0	2	0	0	0	1
1	14	1	1	9	1	8	1	9	6	3	5	4	10	18	2	0	1	2	1	2	2	2	2	1	2	0	1	1	2	2	2	2	0	2	1	0	1	0	1
1	12	1	1	7	0	0	0	1	6	6	4	6	5	22	1	1	1	1	2	2	2	0	1	0	2	1	2	1	1	1	1	1	1	1	1	2	2	2	1
1	13	1	0	3	0	2	1	5	5	2	5	2	8	14	2	2	1	1	0	0	1	1	1	1	2	0	0	2	1	2	2	1	0	2	2	0	2	1	1
0	13	1	1	4	0	2	1	3	1	1	2	0	7	4	2	0	0	1	0	0	1	0	1	0	2	0	0	2	0	0	2	0	0	1	1	0	0	1	1
1	13	1	1	5	1	5	0	5	4	4	5	3	10	16	2	2	0	2	1	1	2	0	2	0	2	1	1	2	2	2	2	2	0	2	2	0	2	1	1
0	13	1	1	10	1	10	1	8	6	4	9	4	10	23	2	2	0	2	1	0	0	1	2	2	0	1	1	2	2	2	2	0	0	2	1	0	2	2	0
1	13	1	1	4	0	0	0	1	6	5	6	4	7	21	2	1	2	1	2	1	1	2	1	2	2	1	0	1	1	1	2	1	1	1	2	0	1	1	0
1	13	1	1	7	1	8	1	6	3	2	5	1	4	11	1	2	0	0	1	0	1	1	1	0	2	0	0	2	1	2	2	0	1	0	1	0	0	0	1
0	13	1	1	7	1	5	1	9	3	4	5	3	4	15	0	1	0	1	2	0	0	1	1	1	1	0	1	1	1	1	2	0	0	0	1	0	1	0	1
0	13	1	1	8	0	0	1	8	4	0	1	0	10	5	2	1	2	2	0	0	2	1	2	0	2	0	0	2	0	1	2	0	0	2	2	0	0	0	2
1	13	1	0	7	1	8	0	0	2	2	3	1	6	8	1	2	0	1	0	0	1	1	2	1	1	1	0	2	0	1	1	0	0	1	2	0	0	0	2
0	13	1	1	10	1	8	1	8	9	4	7	5	10	25	2	2	2	2	2	0	1	2	2	1	2	1	2	1	2	1	2	0	2	2	1	0	2	2	1
1	12	1	1	5	0	0	1	3	1	0	2	2	8	5	2	1	0	1	0	1	2	0	2	1	2	0	0	2	0	1	2	0	1	1	2	0	0	0	2
1	11	1	1	7	1	8	1	10	1	2	6	1	9	10	2	1	0	2	1	0	1	0	2	2	2	0	0	1	1	1	2	0	0	1	1	0	0	0	1
0	12	1	1	7	1	9	1	10	1	4	8	0	9	13	2	1	0	2	2	0	0	0	2	2	2	0	0	2	2	1	2	0	0	1	1	0	0	0	0
0	12	1	1	10	1	10	1	10	6	5	3	2	9	16	2	2	1	2	2	0	1	0	2	1	2	0	1	1	0	2	2	2	1	1	2	0	0	2	2
0	12	1	1	7	0	0	1	10	7	4	7	2	10	20	2	2	0	2	2	0	1	2	2	1	2	0	2	1	2	2	2	1	1	2	1	0	0	1	1
1	12	1	0	0	1	9	0	0	2	2	1	0	8	5	2	0	0	0	0	0	0	0	2	1	2	0	0	2	0	0	2	0	0	2	2	0	0	2	2
1	13	1	1	9	1	10	1	8	4	5	6	6	8	21	2	2	0	1	2	1	1	1	2	0	1	0	0	1	2	2	2	1	1	1	1	1	2	1	1
1	12	1	0	0	1	10	0	0	2	2	2	2	10	8	2	0	0	2	0	0	0	0	2	0	2	0	0	0	0	0	2	0	0	2	2	0	0	2	0
0	12	1	1	7	0	0	0	0	4	0	0	3	8	7	2	0	1	1	0	1	2	1	2	0	2	0	1	1	0	0	2	0	0	1	2	0	1	1	2
1	12	1	1	10	1	3	1	2	1	4	3	3	4	11	1	0	0	0	0	0	1	1	1	0	0	1	0	2	1	0	1	1	0	1	1	1	1	0	1
1	12	1	1	5	1	5	1	5	3	3	1	3	9	10	2	0	1	2	2	0	1	1	2	0	2	0	0	0	0	1	2	0	0	1	1	0	1	0	2
0	12	1	1	9	1	9	1	7	9	5	7	3	5	24	1	2	1	1	2	2	0	2	2	2	2	0	2	1	1	2	1	1	0	0	1	0	0	2	1
1	12	1	1	8	1	10	1	6	4	3	2	0	6	9	1	2	0	1	1	0	1	2	1	0	2	0	0	2	0	2	2	1	0	1	2	0	0	0	2
1	12	1	0	2	0	1	1	8	1	3	0	3	9	7	2	0	0	1	0	0	1	0	2	0	2	0	0	2	0	0	2	1	1	2	2	1	2	1	2
1	12	1	0	2	0	0	0	0	8	7	7	5	7	27	1	2	2	2	2	1	0	1	0	0	2	1	2	1	2	2	2	2	1	2	1	0	2	1	0
0	12	1	1	4	1	3	1	3	5	2	7	3	4	17	1	1	1	1	0	1	1	1	1	2	2	0	0	1	0	2	1	1	0	0	0	0	1	1	0
0	12	1	1	4	1	4	1	3	5	3	6	4	6	18	1	1	1	1	1	1	1	1	1	2	2	0	1	1	0	1	2	1	1	1	1	0	1	1	0
1	11	1	0	5	0	3	1	9	0	1	2	2	9	5	2	0	0	1	0	0	1	0	2	0	2	0	0	1	0	0	2	0	1	2	1	0	0	0	1
0	12	1	1	2	1	4	1	1	7	1	2	7	8	17	2	0	1	2	0	2	1	2	1	2	0	0	2	1	0	1	2	0	0	1	2	0	2	1	2
0	13	1	1	6	0	0	1	10	3	5	8	2	5	18	1	2	0	1	2	1	0	1	1	0	2	0	0	1	2	1	1	1	0	1	0	0	0	1	0
0	12	1	1	9	0	0	1	2	3	2	2	2	5	9	1	0	0	1	0	0	1	1	1	0	2	0	1	1	0	1	2	1	1	0	1	0	0	0	1
0	13	1	1	7	1	8	1	8	6	3	4	1	10	14	2	0	0	2	1	0	1	2	2	0	2	0	1	1	2	2	2	1	0	2	1	0	0	1	1
1	14	1	1	2	1	3	0	0	5	2	4	1	8	12	2	0	0	2	1	0	1	2	1	0	2	0	0	2	2	2	2	0	1	1	2	0	0	1	0
1	13	1	0	0	0	0	0	0	2	2	3	1	9	8	2	0	0	1	0	0	0	2	2	0	2	0	0	1	0	0	2	0	0	2	1	0	0	0	0
0	12	1	1	3	0	0	0	0	8	4	7	2	8	21	1	2	2	2	2	0	1	2	2	1	2	0	1	1	1	2	2	1	0	1	0	0	1	1	1
0	13	1	1	2	1	2	1	4	9	2	5	4	7	20	1	1	2	2	1	1	1	2	1	1	1	0	2	1	1	2	2	0	0	1	1	0	1	1	1
1	13	1	0	4	1	2	1	3	2	4	5	0	6	11	1	2	0	1	1	0	1	1	2	0	2	0	0	2	1	1	1	1	0	1	1	1	0	0	1
1	12	1	1	7	0	0	1	2	0	2	3	4	5	9	1	0	0	1	0	1	1	0	1	0	2	0	0	1	0	0	1	0	0	1	0	1	2	0	1
0	13	1	1	3	0	0	0	0	2	4	7	6	6	19	1	1	0	1	2	2	0	1	1	2	1	0	0	1	2	1	2	0	0	1	2	0	2	0	0
1	13	1	1	7	0	0	0	0	1	1	2	0	9	4	2	0	1	1	0	0	2	0	2	0	2	0	0	2	0	0	2	1	0	2	1	0	0	0	1
1	13	1	1	3	0	0	0	0	3	2	2	2	8	9	1	0	1	1	1	0	1	1	2	0	1	0	0	1	0	1	2	0	0	2	1	0	0	0	1
1	13	1	0	0	0	0	1	10	7	6	6	4	7	23	1	2	2	1	2	1	1	1	2	1	2	2	1	2	2	1	2	1	2	1	1	0	1	2	2
0	13	1	1	8	1	9	0	0	5	2	2	2	8	11	1	0	2	2	1	0	1	2	2	0	2	0	0	2	1	1	2	0	0	1	2	0	2	0	1
1	13	1	1	7	0	0	1	1	5	3	6	1	6	15	1	2	1	1	0	0	0	2	1	0	2	0	0	1	2	2	2	1	0	1	1	0	0	0	1
0	13	1	0	3	0	0	0	0	1	0	0	0	10	1	2	0	0	2	0	0	2	0	2	0	2	0	0	2	0	0	2	0	0	2	2	0	0	1	2
0	13	1	0	0	1	3	0	0	2	2	0	0	9	4	2	0	0	2	1	0	1	0	2	0	2	0	0	2	0	1	2	0	0	1	2	0	0	1	2
0	13	1	1	4	1	8	1	9	6	2	4	0	7	12	1	1	1	2	1	0	1	2	1	1	2	0	1	2	0	1	2	0	0	1	1	0	0	1	1
1	13	1	1	5	0	1	0	0	1	1	4	2	4	8	1	0	0	1	0	0	1	1	1	2	2	0	0	1	0	0	1	0	0	0	1	0	1	0	1
1	13	1	1	4	0	0	0	0	1	1	5	0	8	7	2	1	0	1	0	0	1	0	2	0	2	0	0	2	2	1	2	0	0	1	1	0	0	0	1
1	13	1	0	3	0	1	0	0	0	3	3	0	5	6	1	0	0	1	1	0	1	0	1	1	2	1	0	2	0	0	2	0	0	0	0	0	0	0	2
1	12	1	1	5	0	0	1	6	4	7	4	4	6	19	0	1	0	1	2	0	1	2	2	1	0	1	0	2	0	1	2	2	0	1	0	1	2	1	2
1	13	1	0	1	0	0	0	0	1	0	2	2	8	5	2	0	0	1	0	0	2	1	2	1	2	0	0	2	0	0	1	0	0	2	2	0	2	0	1
1	13	1	1	3	0	0	1	8	7	2	4	1	10	14	2	1	2	2	0	0	2	2	2	1	2	0	0	2	1	2	2	2	0	2	2	0	1	1	1
0	12	1	1	6	1	7	1	5	5	2	3	2	10	12	2	0	1	2	1	0	1	2	2	1	2	0	1	1	0	0	2	0	0	2	1	0	1	1	1
0	13	1	0	5	1	8	0	0	3	1	3	1	5	8	2	1	0	1	1	0	2	1	1	1	2	0	0	1	1	1	0	0	0	1	2	0	0	1	2
1	12	1	1	4	0	0	1	2	2	6	3	5	8	16	1	0	0	2	2	2	0	0	1	1	2	0	2	1	0	0	2	2	2	2	1	0	0	0	1
0	13	1	1	7	1	5	1	8	2	4	6	2	8	14	1	2	0	2	1	0	0	1	2	2	1	0	0	2	1	1	1	0	0	2	1	1	1	0	2
0	13	1	1	8	1	8	1	7	8	4	5	0	9	17	2	2	1	1	1	0	1	2	2	1	2	1	1	2	1	2	2	1	0	2	2	0	0	2	1
0	13	1	1	7	1	7	1	4	2	2	3	1	6	8	1	0	0	2	1	0	1	1	1	0	2	0	0	1	1	1	2	0	0	0	1	0	0	0	1
0	14	1	0	2	0	2	0	1	8	4	8	8	10	28	2	2	1	2	2	1	2	2	2	2	1	0	1	0	1	2	2	2	2	2	1	0	2	2	0
1	13	1	1	10	1	6	1	8	4	6	6	3	8	19	2	1	1	2	1	0	0	2	2	2	1	1	0	2	2	0	1	2	0	1	2	0	2	1	1
1	13	1	1	4	0	0	1	10	4	0	3	0	9	7	2	1	1	2	0	0	2	2	2	2	2	0	0	2	0	0	1	0	0	2	2	0	0	1	2
0	12	1	1	5	1	8	1	5	5	6	4	2	9	17	2	1	0	1	2	0	1	1	2	1	2	1	2	2	1	1	2	1	1	2	2	1	1	1	1
0	12	1	1	8	1	9	1	6	5	6	8	2	5	21	1	2	0	0	1	0	0	2	1	1	2	1	1	1	2	1	2	1	1	1	1	1	0	1	0
0	11	1	0	0	0	0	1	2	7	1	6	2	9	16	1	2	2	2	1	1	2	1	2	1	2	0	1	2	1	1	2	0	1	2	1	0	0	2	1
0	11	1	1	2	0	0	0	0	2	2	8	2	9	14	1	1	1	2	0	1	0	0	2	1	2	0	0	2	2	1	2	0	1	2	0	0	0	0	0
0	12	1	1	4	0	1	1	2	1	0	0	1	10	2	2	0	0	2	0	0	2	1	2	0	2	0	0	2	0	0	2	0	1	2	2	0	0	0	2
1	11	1	0	4	1	6	0	0	3	4	4	3	7	14	1	0	0	1	2	0	1	0	1	0	1	0	1	1	2	1	2	1	1	2	1	0	0	1	1
0	11	1	1	5	1	2	1	1	2	1	2	1	7	6	2	0	0	2	0	0	1	0	1	0	2	0	0	1	0	1	2	0	0	0	1	0	0	1	1
0	12	1	0	3	0	0	0	0	7	3	4	7	10	21	2	0	1	2	2	2	1	2	2	2	0	0	2	1	0	0	2	0	1	2	1	0	1	2	1
1	11	1	1	7	0	3	0	2	2	3	5	0	10	10	2	2	2	2	1	0	1	0	2	1	2	1	0	2	1	0	2	0	0	2	1	0	0	0	2
0	12	1	1	7	1	8	1	5	3	2	0	0	10	5	2	0	0	2	1	0	2	1	2	0	2	0	0	2	0	2	2	1	0	2	2	0	0	0	2
1	12	1	1	5	0	0	1	2	1	1	2	1	10	5	2	0	1	2	0	0	2	0	2	1	2	0	0	2	0	0	2	1	0	2	1	0	1	0	2
1	12	1	0	5	1	4	0	0	2	1	2	0	9	5	2	1	1	2	0	0	2	0	1	0	2	0	0	2	0	0	2	1	0	2	2	0	0	1	1
1	11	1	0	0	0	0	1	2	5	2	3	2	9	12	2	1	1	1	0	0	2	1	2	1	2	0	1	2	0	1	2	1	1	2	1	1	1	1	2
1	13	1	0	0	1	5	1	8	5	3	5	1	10	14	2	1	0	2	0	0	1	2	2	1	2	0	1	2	2	1	2	2	0	2	2	0	1	1	1
0	12	1	1	4	1	5	0	0	4	2	3	3	8	12	1	1	0	1	2	1	2	1	2	0	2	0	1	2	0	1	2	0	1	2	1	0	1	1	1
1	11	1	0	6	1	7	0	5	3	2	6	0	9	11	2	2	2	2	1	0	1	1	2	0	2	0	0	2	2	0	2	0	0	1	1	0	0	0	1
1	12	1	1	6	1	4	1	5	8	4	7	2	5	21	1	1	1	1	2	0	1	2	1	2	2	0	2	1	2	2	1	1	1	1	1	0	0	1	1
1	12	1	1	7	0	7	1	10	5	0	4	1	9	10	2	1	0	2	0	0	2	1	2	0	2	0	1	1	1	2	2	0	0	1	0	0	0	1	2
1	14	1	0	6	1	7	0	10	1	1	2	4	9	8	2	0	0	1	0	0	1	0	2	0	1	0	0	2	0	1	2	0	1	2	0	0	2	0	2
0	12	1	1	4	1	3	1	5	2	0	3	0	7	5	1	0	0	1	0	0	2	1	2	1	2	0	0	2	0	1	2	0	0	1	1	0	0	0	1
1	13	1	1	8	1	9	1	7	0	3	5	2	9	10	2	2	0	1	2	0	1	0	2	0	2	0	0	2	1	0	2	0	0	2	1	0	2	0	1
1	12	1	1	7	1	7	1	6	1	2	0	3	2	6	1	0	0	0	0	1	1	0	0	0	2	1	0	0	0	1	1	0	0	0	2	0	0	0	2
1	11	1	1	10	1	8	1	9	7	6	5	4	7	22	1	1	1	2	2	1	1	1	2	1	1	2	2	1	1	1	2	0	0	0	1	1	1	2	1
1	14	1	0	4	0	4	0	2	6	3	4	2	7	15	2	0	1	1	1	0	1	1	1	1	1	0	1	1	1	2	2	1	0	1	1	0	0	1	1
1	13	1	1	7	0	0	0	0	0	1	3	0	8	4	2	1	0	1	0	0	1	0	2	0	2	0	0	2	1	0	2	0	0	1	2	0	0	0	1
0	13	1	1	8	1	5	0	0	5	4	8	1	10	18	2	2	0	2	2	0	1	1	2	1	2	0	2	2	2	1	2	1	1	2	1	0	0	1	0
1	13	1	0	6	0	0	0	0	2	1	4	6	3	13	2	0	1	1	0	2	1	1	0	0	0	0	0	0	0	0	0	0	0	0	0	0	0	0	0
1	13	1	1	7	1	6	1	9	0	3	5	1	6	9	2	1	0	1	1	0	1	0	1	0	2	0	0	1	2	0	1	0	0	1	1	1	0	0	1
0	13	1	1	8	1	6	0	0	6	1	1	1	8	9	2	0	1	2	0	0	1	1	1	0	1	0	1	2	0	1	2	0	0	1	1	0	0	2	2
1	12	1	1	7	0	2	0	1	2	5	7	0	5	14	1	1	1	2	1	0	0	1	1	1	2	0	0	2	2	0	1	1	0	0	1	1	0	0	0
0	13	1	1	5	1	2	1	1	2	2	1	1	6	6	1	0	0	1	0	0	0	0	1	0	1	0	0	2	0	1	2	0	0	1	2	0	0	1	1
1	12	1	1	6	0	0	0	0	0	1	1	1	7	3	2	1	0	1	0	0	1	0	2	0	2	0	0	1	0	0	2	0	0	0	2	0	0	0	2
1	12	1	1	10	1	5	1	5	5	3	3	3	9	14	2	0	1	1	0	0	0	1	2	1	2	0	1	1	1	0	2	0	1	2	2	1	1	2	1
0	13	1	0	3	0	2	1	1	4	1	0	3	9	8	2	0	1	1	0	0	1	0	2	0	2	0	1	1	0	1	2	0	1	2	2	0	1	1	2
1	12	1	1	10	1	6	0	5	3	4	4	5	5	16	1	0	2	1	1	0	1	0	1	2	1	0	1	1	1	0	1	2	2	1	2	0	1	0	1
1	12	1	1	8	1	6	1	5	3	6	3	2	6	14	1	0	0	1	2	0	0	2	1	1	2	1	0	1	1	1	2	1	0	1	2	0	1	0	1
0	13	1	1	10	0	0	1	10	9	9	4	4	10	26	2	1	2	2	2	2	1	2	2	1	2	2	2	2	2	2	2	2	0	2	2	2	2	1	2
1	14	1	1	2	0	0	1	4	2	1	4	0	8	7	2	1	0	2	0	0	1	1	1	1	2	0	0	2	1	1	2	0	0	1	2	0	0	0	1
0	12	1	1	8	1	5	0	3	10	6	6	4	8	26	1	0	2	2	1	0	0	2	1	1	2	0	2	2	1	2	2	2	2	2	0	1	2	2	0
1	12	1	0	2	0	0	0	0	7	4	4	5	8	20	2	1	2	1	2	1	1	2	1	2	2	1	1	1	0	0	2	0	1	2	1	0	2	2	2
1	12	1	1	8	0	0	1	1	1	0	5	3	8	9	1	1	0	2	0	1	2	0	2	0	2	0	0	2	2	1	2	0	1	1	2	0	1	0	0
0	13	1	1	7	1	7	1	2	7	2	7	2	5	18	1	2	1	1	1	0	1	2	1	1	2	0	1	1	1	2	1	0	0	1	1	0	1	1	0
0	12	1	1	6	0	0	1	1	4	3	4	3	7	14	2	1	1	1	2	1	1	2	1	1	2	0	0	1	0	1	2	0	0	1	1	0	1	0	1
0	13	1	1	8	0	0	1	5	7	4	4	1	8	16	2	1	0	1	2	0	1	2	2	1	2	1	2	1	1	2	2	0	0	1	2	0	0	1	1
0	13	1	1	5	0	1	1	9	9	4	2	4	8	19	2	1	1	1	1	1	1	2	2	0	2	0	2	1	0	2	2	2	2	1	2	0	0	2	1
0	13	1	1	3	1	8	1	7	4	5	4	0	10	13	2	1	0	2	2	0	1	1	2	1	2	1	1	2	0	1	2	1	0	2	1	0	0	1	1
1	13	1	1	8	1	7	0	0	1	1	5	1	6	8	1	1	1	2	0	0	1	0	1	1	2	0	0	1	1	0	1	0	0	1	1	0	0	0	1
1	12	1	0	7	1	9	1	5	3	3	3	1	9	10	2	1	0	1	1	0	1	1	2	0	2	1	0	1	1	2	2	0	0	2	1	0	0	0	2
1	13	1	1	9	1	10	0	0	3	4	4	2	8	13	2	0	0	1	1	0	1	2	2	0	2	0	0	1	1	1	2	2	1	1	1	0	0	0	0
0	13	1	0	5	1	8	1	8	2	4	6	2	8	14	1	0	0	2	1	0	1	0	2	1	2	1	1	1	2	0	2	0	1	1	0	1	0	1	1
1	13	1	1	2	1	3	1	2	4	2	3	4	7	13	1	1	1	1	0	1	0	2	1	1	2	0	0	1	0	0	2	0	2	2	2	0	0	1	1
1	13	1	0	10	0	10	0	10	2	1	2	2	7	7	2	1	0	1	0	0	1	1	1	0	2	0	0	1	1	0	2	0	1	1	2	0	0	1	2
0	13	1	1	8	1	8	1	2	9	3	7	1	5	20	1	2	2	1	2	1	1	2	1	2	2	0	1	2	1	2	1	0	0	1	1	0	0	2	1
0	12	1	1	4	1	2	0	0	9	5	8	6	9	28	2	1	2	1	1	0	0	2	2	2	1	1	2	1	2	2	2	1	2	2	0	0	2	1	1
0	13	1	1	7	0	0	0	0	6	5	5	5	7	21	0	1	1	1	2	2	1	2	2	1	1	0	1	1	2	2	2	1	1	2	2	1	0	0	1
1	13	1	1	8	1	7	1	9	5	7	4	5	6	21	1	1	1	1	2	2	1	1	1	2	2	2	1	1	0	1	2	0	1	1	2	2	1	1	1
1	12	1	0	4	0	0	1	6	0	1	1	0	9	2	2	1	0	1	0	0	1	0	2	0	2	0	0	2	0	0	2	0	0	2	2	0	0	0	2
1	13	1	1	8	0	0	0	0	0	1	1	0	10	2	2	0	0	2	0	0	1	0	2	0	2	0	0	2	1	0	2	0	0	2	2	0	0	0	2
0	12	1	1	4	1	5	1	2	0	1	3	0	5	4	1	0	0	2	0	0	1	0	2	0	2	0	0	2	1	0	0	0	0	0	1	0	0	0	1
1	13	1	1	9	1	3	1	6	2	2	2	0	7	6	2	0	2	1	0	0	1	0	1	1	2	0	0	2	0	0	2	1	0	1	2	0	0	0	1
0	13	1	1	2	0	0	1	1	2	1	1	1	7	5	1	0	0	1	0	0	1	1	2	1	2	0	0	1	0	1	2	0	0	1	2	0	0	0	2
1	12	1	1	6	0	0	0	0	4	3	4	4	9	15	2	0	1	2	2	1	1	1	2	0	2	0	0	1	1	2	2	0	1	1	1	0	1	0	0
1	14	1	1	3	0	0	0	0	1	1	1	1	7	4	2	0	0	1	0	1	1	0	1	0	2	0	0	2	1	1	2	0	0	1	2	0	0	0	2
1	13	1	0	4	0	2	0	1	5	1	3	6	10	15	2	1	1	2	0	2	1	2	2	2	1	0	0	1	0	1	2	0	1	2	2	0	1	1	2
1	12	1	0	1	0	0	0	0	2	3	3	0	6	8	1	1	0	1	0	0	0	1	1	0	2	1	0	2	0	1	2	0	0	1	1	0	0	0	1
1	12	1	1	5	0	0	1	5	0	4	1	0	6	5	1	0	0	1	1	0	1	0	1	1	2	1	0	2	0	0	2	1	0	1	2	0	0	0	2
0	14	1	1	8	1	4	1	9	5	2	4	4	9	15	2	1	1	2	1	0	2	1	2	1	1	0	1	2	1	1	2	1	1	1	2	0	2	1	1
0	13	1	1	2	0	0	1	10	10	4	1	0	10	15	2	0	2	2	2	0	2	2	2	0	2	1	2	2	0	2	2	0	0	2	2	1	0	2	1
0	13	1	1	8	1	5	0	0	4	1	3	0	7	8	1	0	1	1	0	0	2	1	2	0	2	0	0	2	1	1	2	0	0	1	1	1	0	1	1
0	13	1	1	4	1	2	1	7	3	6	1	1	9	11	2	1	1	1	2	0	1	0	2	0	1	1	1	2	0	0	2	1	0	2	2	1	0	1	2
0	13	1	1	3	0	0	0	0	0	1	1	0	8	2	2	0	0	1	0	0	1	0	2	0	2	0	0	2	0	0	2	0	0	1	2	0	0	0	1
0	13	1	1	4	1	2	1	8	1	1	2	0	10	4	2	0	0	2	0	0	1	0	2	0	2	0	0	2	0	1	2	0	0	2	1	0	0	0	1
0	12	1	0	10	1	10	1	10	1	4	4	2	4	11	1	2	0	0	2	0	0	1	2	0	2	0	0	0	0	0	1	0	0	0	2	0	0	0	0
0	12	1	1	4	0	0	0	0	1	2	6	3	8	12	2	2	0	2	1	0	1	1	1	2	2	0	0	0	0	0	2	0	1	1	2	0	0	0	0
0	12	1	1	5	1	6	1	2	5	2	3	0	6	10	2	1	2	2	0	0	0	2	1	0	2	0	0	2	1	1	0	0	0	1	2	0	0	0	1
1	13	1	1	2	1	1	0	0	1	2	4	0	9	7	2	1	1	2	0	0	1	0	2	0	2	0	0	2	1	0	2	1	0	1	1	0	0	0	1
1	13	1	1	8	1	9	0	0	3	3	5	0	8	11	1	2	0	2	0	0	1	2	1	0	2	1	0	2	2	1	2	1	0	2	2	0	0	0	1
1	13	1	1	3	0	0	0	0	1	3	4	0	9	8	2	1	0	2	1	0	1	0	2	0	2	0	0	2	1	1	2	1	0	1	1	0	0	0	1
1	13	1	1	4	0	0	1	1	0	0	0	0	9	0	2	0	0	2	0	0	2	0	2	0	2	0	0	2	0	0	2	0	0	1	2	0	0	0	2
1	13	1	1	7	0	0	1	6	1	4	4	1	7	10	1	0	1	1	1	1	1	0	2	1	2	1	0	2	1	0	2	1	0	1	1	0	0	0	1
0	12	1	1	10	1	10	1	5	4	3	5	3	10	15	2	1	1	2	1	0	1	1	2	1	2	1	1	2	1	1	2	0	2	2	1	0	1	0	1
0	13	1	1	10	1	10	1	5	2	1	2	0	10	5	2	0	1	2	0	0	2	0	2	0	2	1	0	2	0	1	2	0	0	2	1	0	0	0	1
0	12	1	1	3	0	0	1	8	3	1	4	1	10	9	2	1	1	2	1	0	2	1	2	1	2	0	0	1	0	0	2	0	0	2	1	0	0	1	1
0	12	1	1	9	1	10	0	0	2	3	4	0	7	9	1	0	1	2	1	0	0	0	2	0	2	0	1	2	1	0	1	0	0	1	0	0	0	0	1
0	12	1	1	4	1	6	0	0	0	2	4	1	8	7	1	0	0	2	0	0	0	0	2	0	2	0	0	2	1	0	2	0	0	1	0	0	1	0	1
0	13	1	1	4	0	1	0	2	5	0	4	1	6	10	2	1	1	1	0	0	2	2	1	0	2	0	0	2	1	1	1	0	0	1	1	0	1	1	1
0	13	1	1	4	0	1	0	1	4	3	2	3	6	12	2	0	1	1	2	1	1	2	1	0	2	0	0	1	1	1	1	0	0	1	2	0	1	0	1
1	13	1	1	5	0	0	0	0	2	3	2	0	4	7	1	0	0	1	1	0	0	1	1	0	2	0	0	2	1	1	1	0	0	0	2	0	0	0	1
1	14	1	1	3	0	3	1	4	1	3	5	2	4	11	1	0	0	1	0	0	0	1	1	0	1	0	0	1	1	0	1	0	0	0	0	1	0	0	0
1	12	1	0	4	0	2	0	0	1	2	1	0	6	4	1	0	0	1	0	0	1	1	1	0	2	0	0	2	0	0	2	0	0	1	1	1	0	0	2
1	11	1	1	5	0	0	1	3	3	1	2	0	10	6	2	0	2	2	0	0	1	0	2	0	2	0	0	2	1	0	2	0	0	2	1	0	0	1	2
1	12	1	1	3	0	0	0	0	0	0	1	2	9	3	2	0	0	2	0	0	2	0	2	0	2	0	0	0	0	0	2	0	0	1	1	0	0	0	2
1	12	1	1	6	0	0	1	8	4	3	2	4	6	13	2	1	0	1	2	1	1	1	1	1	2	0	1	1	0	2	1	0	1	1	2	0	1	0	2
1	11	1	1	10	1	6	0	0	2	1	8	0	8	11	1	2	1	2	1	0	2	0	1	2	2	0	0	2	2	1	2	0	0	2	1	0	0	0	1
1	13	1	0	3	0	0	0	0	1	3	4	1	10	9	2	1	0	2	0	0	1	1	2	1	2	0	0	2	0	0	2	0	1	2	1	2	0	0	1
0	12	1	1	6	1	7	1	8	3	3	4	2	10	12	2	1	2	2	1	0	1	0	2	1	2	0	1	2	1	0	2	1	0	2	2	0	2	0	1
1	12	1	1	10	0	0	0	0	2	3	4	3	7	12	1	1	0	1	0	0	1	1	1	0	1	1	0	1	1	1	2	0	0	2	2	1	1	0	0
0	12	1	1	8	1	4	1	10	9	3	2	2	7	16	2	0	2	1	2	1	2	2	2	0	2	0	2	1	2	1	2	1	0	0	2	0	0	2	2
0	12	1	1	6	0	0	0	0	1	2	3	0	10	6	2	0	0	2	1	0	1	0	2	0	2	0	1	2	1	0	2	0	0	2	1	0	0	0	1
0	11	1	0	0	0	0	0	0	9	2	5	2	5	18	0	0	2	2	1	0	2	2	1	1	2	0	2	1	1	2	2	1	1	0	1	0	0	1	0
0	12	1	0	0	0	0	0	0	0	1	0	0	10	1	2	0	0	2	0	0	1	0	2	0	2	0	0	2	0	0	2	0	0	2	2	0	0	0	2
1	12	1	1	4	0	0	1	2	1	3	4	2	6	10	1	0	0	1	0	1	1	0	1	1	2	1	0	1	1	1	1	1	0	2	1	0	0	0	1
0	13	1	0	1	0	1	1	2	3	0	2	1	10	6	2	1	0	2	0	0	2	1	2	0	2	0	1	2	0	1	2	0	0	2	1	0	1	0	2
1	12	1	1	7	0	0	1	9	3	3	10	1	8	17	1	2	1	2	1	0	1	1	1	2	2	1	1	2	2	0	2	0	0	2	0	0	1	0	0
1	12	1	1	7	1	4	0	0	2	1	6	0	10	9	2	2	0	2	0	0	1	1	2	1	2	0	0	2	1	1	2	0	0	2	1	0	0	0	1
1	12	1	1	5	1	2	1	5	3	2	0	0	9	5	2	0	1	2	1	0	1	1	2	0	2	0	0	2	0	1	2	0	0	1	2	0	0	0	2
0	12	1	1	7	0	0	0	0	3	2	4	2	10	11	2	1	1	2	0	0	1	1	2	1	2	1	0	2	1	0	2	0	1	2	2	0	1	1	1
1	12	1	0	0	0	0	0	0	3	4	3	3	6	13	1	0	1	1	1	0	1	1	1	0	2	0	0	2	1	0	2	2	2	1	0	0	1	1	2
1	11	1	1	2	0	0	0	0	3	2	1	2	6	8	1	0	0	1	1	0	1	2	2	0	2	0	0	1	0	1	0	0	0	2	2	0	1	0	1
0	12	1	1	3	1	9	1	4	9	5	3	3	5	20	1	0	1	1	1	2	1	2	1	0	2	1	2	1	1	2	2	1	0	0	1	1	0	2	1
1	12	1	0	2	0	0	0	0	7	2	2	5	9	16	2	0	2	1	1	1	2	2	2	1	2	0	1	1	0	1	2	1	2	2	1	0	1	1	2
1	11	1	1	7	0	6	1	8	1	2	4	5	6	12	2	0	0	1	1	1	1	1	1	0	1	0	0	1	2	0	2	0	1	0	1	0	1	0	1
0	12	1	0	1	0	0	0	0	4	2	1	2	9	9	2	0	0	1	1	0	1	1	2	1	1	0	0	2	0	2	2	0	0	2	2	0	1	1	2
0	12	1	0	1	0	0	1	10	2	0	0	0	9	2	2	0	1	2	0	0	2	0	1	0	2	0	0	2	0	1	2	0	0	2	2	0	0	0	2
0	12	1	1	4	0	0	1	6	7	0	2	3	9	12	2	0	1	1	0	1	2	1	2	0	2	0	2	1	0	2	2	0	1	2	1	0	0	1	1
0	12	1	0	0	1	3	1	5	6	0	1	3	10	10	2	1	2	2	0	1	2	2	2	0	2	0	2	2	0	0	2	0	0	2	2	0	2	0	2
1	10	1	1	10	0	0	1	1	6	6	9	7	10	28	2	2	0	2	2	1	0	1	2	2	0	0	2	0	2	1	2	2	2	2	1	0	0	2	0
1	12	1	1	2	0	0	1	5	5	6	3	4	7	18	2	1	1	1	2	1	1	2	2	1	2	1	1	1	0	1	1	2	2	1	2	0	0	0	1
0	12	1	1	3	0	0	0	0	0	0	0	0	10	0	2	0	0	2	0	0	2	0	2	0	2	0	0	2	0	0	2	0	0	2	2	0	0	0	2
0	12	1	1	8	1	9	1	8	2	1	1	1	9	5	2	0	1	2	1	0	2	1	2	0	2	0	0	2	0	0	2	0	0	1	2	0	1	0	1
0	12	1	1	4	0	0	1	5	3	0	4	1	8	8	2	1	0	2	0	0	2	1	2	1	2	0	1	1	0	1	1	0	0	1	1	0	0	0	1
0	12	1	1	4	1	8	1	5	2	2	2	0	10	6	2	0	1	2	1	0	1	1	2	0	2	0	0	2	1	0	2	0	0	2	2	0	0	0	1
1	12	1	0	3	1	4	0	0	1	1	3	0	10	5	2	1	1	2	0	0	1	0	2	0	2	0	0	2	0	0	2	0	0	2	1	0	0	0	1
1	12	1	1	9	1	4	0	0	1	1	3	2	9	7	2	1	0	1	0	0	1	0	2	0	2	0	0	1	0	1	2	0	0	2	1	0	1	0	1
0	11	1	1	3	0	0	1	1	2	0	1	2	7	5	2	0	0	2	0	1	2	1	2	0	2	0	0	1	0	1	0	0	0	1	2	0	0	0	1
0	11	1	1	7	0	0	1	2	8	0	4	4	9	16	2	1	1	1	0	1	2	2	2	1	2	0	1	1	1	2	2	0	1	2	2	0	1	2	1
0	11	1	1	6	0	0	0	0	2	2	3	1	9	8	2	1	0	1	1	0	1	1	2	0	1	0	1	2	0	0	2	0	0	2	1	0	0	0	1
1	12	1	1	3	0	1	1	4	2	3	2	2	3	9	0	1	2	1	2	0	1	0	0	0	2	0	0	1	0	0	2	0	0	0	2	0	1	0	1
0	11	1	1	3	1	3	0	0	3	2	2	1	4	8	1	0	1	1	0	0	1	1	1	0	2	0	0	1	0	0	1	0	0	0	1	1	0	1	1
0	12	1	1	10	1	7	1	10	8	8	7	4	3	27	1	2	2	0	1	0	0	2	1	0	1	2	1	2	2	2	0	1	1	1	0	2	2	1	1
0	12	1	0	0	0	0	0	0	4	2	0	0	8	6	2	0	1	1	1	0	1	1	2	0	2	0	1	2	0	1	2	0	0	1	2	0	0	0	2
1	12	1	0	4	0	0	0	0	10	4	2	5	6	21	1	0	2	1	2	2	2	2	1	0	2	1	2	1	1	2	2	1	1	1	2	0	1	2	1
0	12	1	0	5	1	4	1	6	3	1	2	1	9	7	2	1	1	2	0	0	1	1	2	0	2	0	0	1	0	1	2	0	0	1	2	0	0	0	1
1	12	1	1	2	0	1	1	5	0	2	4	4	3	10	1	0	0	1	0	0	0	0	0	0	0	0	0	0	0	0	1	0	0	0	0	0	0	0	0
1	11	1	0	0	1	10	0	0	1	3	5	2	8	11	1	2	0	1	0	0	1	0	2	0	2	1	1	2	1	0	2	1	1	2	0	0	1	0	2
1	12	1	0	0	1	3	1	5	2	4	4	2	5	12	1	0	0	1	1	0	1	0	1	1	2	0	2	1	1	0	1	2	0	1	1	0	1	0	1
0	11	1	1	6	1	10	1	5	4	2	5	1	8	12	2	1	2	1	1	0	1	1	2	2	2	0	0	1	1	1	2	0	0	1	2	0	0	0	1
1	12	1	1	2	1	2	0	0	1	2	1	0	10	4	2	0	0	2	1	0	1	0	2	0	2	0	0	2	0	1	2	0	0	2	1	0	0	0	2
1	11	1	0	1	0	0	0	1	1	1	2	1	8	5	1	1	0	2	0	0	1	1	2	0	2	0	0	2	1	0	2	0	0	1	2	0	1	0	2
1	11	1	0	4	0	0	0	0	1	2	2	0	9	5	2	0	0	1	1	0	1	0	2	0	2	0	1	2	1	0	2	0	0	2	2	0	0	0	1
1	12	1	1	7	0	2	0	0	6	5	3	8	4	22	0	0	0	0	2	2	1	2	1	2	2	0	2	0	1	0	2	2	2	1	2	0	2	2	2
1	12	1	1	1	0	0	1	2	1	1	1	2	9	5	2	0	0	1	1	1	2	0	2	0	2	0	0	2	1	1	2	0	0	2	2	0	1	0	2
0	13	1	1	8	1	8	1	10	6	6	8	1	6	21	1	2	2	1	2	0	0	2	2	0	2	2	2	2	2	0	2	0	0	0	0	0	1	0	0
1	13	1	1	4	1	4	1	5	4	3	1	0	10	8	2	1	2	2	1	0	1	1	2	0	2	0	1	2	0	0	2	1	0	2	2	0	0	0	2
1	12	1	1	3	1	5	0	0	4	1	5	2	4	12	2	2	2	0	0	0	1	0	1	0	2	0	1	1	0	1	1	0	1	0	1	0	0	0	0
1	13	1	0	4	1	7	0	0	1	0	1	0	8	2	2	0	1	2	0	0	2	0	2	0	2	0	0	2	1	0	2	0	0	0	2	0	0	0	2
1	13	1	1	10	0	0	0	0	2	1	5	2	9	10	1	0	0	2	0	0	1	0	2	1	2	0	0	1	2	2	2	0	1	2	1	0	0	0	1
0	13	1	1	9	1	7	1	8	9	3	5	4	8	21	1	0	2	1	1	1	2	2	2	2	2	1	2	1	1	2	2	1	1	2	1	0	1	1	1
1	13	1	1	7	0	0	0	0	2	1	3	6	7	12	1	1	0	1	0	1	1	1	2	0	0	0	0	1	0	1	2	0	1	1	1	0	1	0	1
1	13	1	1	3	0	0	0	0	1	1	1	0	8	3	2	0	0	2	0	0	1	0	1	0	2	0	0	2	0	0	2	0	0	1	2	0	0	1	1
1	13	1	1	8	0	0	1	4	1	4	3	0	5	8	1	0	0	1	1	0	0	0	1	0	2	0	0	2	1	1	1	0	0	1	1	1	0	0	1
0	13	1	0	0	0	0	1	7	3	2	0	0	7	5	1	0	1	2	2	0	2	1	1	0	2	0	0	2	0	1	2	0	0	1	2	0	0	0	2
1	13	1	1	3	0	0	0	0	0	0	6	3	4	9	1	0	0	1	0	0	2	0	0	1	0	0	0	1	1	0	2	0	0	0	0	0	0	0	0
1	13	1	1	10	1	10	1	10	1	8	7	0	1	16	1	2	0	0	2	0	0	1	0	0	2	2	0	2	2	0	0	1	0	0	1	1	0	0	0
1	12	1	1	9	1	5	1	10	5	4	2	1	7	12	2	0	0	1	0	0	1	2	1	0	2	0	1	2	1	1	2	2	1	1	2	1	0	1	1
1	12	1	1	8	1	6	1	4	0	2	6	1	6	9	1	2	0	1	0	0	1	0	1	2	2	0	0	1	1	0	2	1	0	1	1	0	0	0	2
1	12	1	1	7	0	0	0	0	0	3	3	0	6	6	1	1	0	1	0	0	0	0	1	0	2	0	0	2	0	0	2	0	0	1	1	1	0	0	1
1	13	1	0	0	0	3	0	2	0	1	2	1	7	4	2	0	0	1	0	0	1	0	1	0	2	0	0	2	0	0	2	0	0	1	1	0	1	0	1
1	12	1	1	6	0	0	1	5	0	4	3	0	8	7	1	0	0	2	1	0	1	0	2	0	2	0	0	2	1	0	2	0	0	1	1	2	0	0	1
0	13	1	1	2	0	0	1	1	4	0	1	0	9	5	2	0	1	1	0	0	2	1	2	1	2	0	1	2	0	1	2	0	0	2	2	0	0	0	2
0	13	1	1	10	1	5	1	3	7	3	5	4	7	19	2	0	1	2	1	0	1	2	1	0	0	0	1	1	2	2	1	0	1	1	1	1	0	1	0
0	13	1	1	10	0	0	0	0	8	7	5	8	8	28	2	1	1	2	2	2	1	2	2	2	0	2	2	0	0	2	1	2	2	1	1	0	0	1	1
1	13	1	1	5	0	0	0	0	1	0	1	5	9	7	2	0	0	1	0	1	2	1	2	0	1	0	0	1	0	0	2	0	1	2	2	0	1	0	1
1	12	1	1	8	0	4	1	5	5	3	6	2	9	16	2	1	1	2	1	0	1	2	2	1	2	0	1	1	2	0	2	1	0	1	1	0	1	1	1
0	12	1	0	7	0	5	0	5	1	0	1	0	10	2	2	0	1	2	0	0	2	0	2	0	2	0	0	2	0	0	2	0	0	2	2	0	0	0	1
0	12	1	0	4	0	0	0	1	0	1	1	1	8	3	2	0	0	2	1	0	2	0	2	0	2	0	0	2	1	0	0	0	0	2	2	0	1	0	2
0	12	1	0	8	1	9	1	10	2	4	2	5	8	13	0	0	0	2	0	1	1	1	2	1	2	0	0	1	0	0	2	2	2	2	1	1	1	1	2
0	11	1	1	3	0	0	0	0	1	0	0	2	10	3	2	0	0	2	0	1	2	0	2	0	2	0	0	1	0	0	2	0	0	2	2	0	0	1	2
1	12	1	0	5	1	7	0	0	4	4	4	0	9	12	2	2	1	2	1	0	1	1	2	1	2	1	1	2	0	0	2	1	0	1	2	0	0	1	1
0	12	1	1	3	0	0	1	7	4	2	3	1	6	10	2	1	0	1	1	0	1	2	1	0	2	0	0	1	0	1	1	0	0	1	1	0	0	1	1
1	12	1	1	7	0	1	0	0	2	1	3	2	8	8	2	0	0	1	0	0	1	1	2	2	2	0	0	1	0	1	2	0	0	1	2	0	1	0	1
0	11	1	1	8	0	0	1	8	9	4	8	7	5	28	1	2	1	1	2	2	0	2	1	2	1	0	2	1	2	2	1	0	2	1	2	0	1	2	0
0	12	1	1	9	0	0	1	3	5	3	5	3	6	16	1	2	1	1	2	0	1	1	1	1	2	0	1	1	0	1	2	0	0	1	1	0	2	1	1
0	12	1	1	9	0	0	1	1	5	4	4	3	8	16	1	1	1	1	2	0	0	2	2	2	1	0	1	1	0	0	2	0	0	2	2	0	1	1	1
0	11	1	1	5	0	0	1	8	10	4	5	2	6	21	1	1	2	1	2	1	1	2	1	1	2	0	2	1	1	2	2	1	0	1	1	0	0	2	1
1	12	1	0	4	1	2	1	1	3	3	5	0	8	11	2	1	0	1	1	0	1	2	2	1	2	1	0	2	1	1	2	0	0	1	1	0	0	0	1
0	11	1	1	4	1	10	1	5	3	6	6	3	7	18	2	1	1	1	2	0	0	1	1	2	2	0	0	1	1	0	2	2	1	1	2	0	1	1	0
0	11	1	0	1	0	1	0	0	5	3	8	0	7	16	2	2	1	0	2	0	1	1	2	0	2	0	0	2	2	1	2	0	0	1	0	0	0	2	0
0	11	1	0	2	0	1	0	0	1	0	0	0	10	1	2	0	0	2	0	0	2	0	2	0	2	0	0	2	0	0	2	0	0	2	2	0	0	1	2
1	12	1	1	7	1	5	0	1	2	4	6	0	5	12	1	2	1	1	1	0	1	0	1	1	2	1	1	2	1	0	2	1	0	0	1	0	0	0	1
1	12	1	1	4	1	5	1	5	1	0	1	1	10	3	2	1	0	2	0	0	2	0	2	0	2	0	0	2	0	1	2	0	0	2	2	0	1	0	2
1	12	1	0	2	0	0	0	0	0	0	0	0	10	0	2	0	0	2	0	0	2	0	2	0	2	0	0	2	0	0	2	0	0	2	2	0	0	0	2
0	11	1	1	5	0	0	1	3	6	3	3	1	7	13	1	1	0	1	1	0	1	2	2	0	2	0	1	2	1	1	2	0	0	1	2	1	1	2	1
0	12	1	1	4	0	0	1	1	0	2	3	1	8	6	2	0	0	1	0	0	1	0	2	0	2	0	0	1	1	0	2	1	0	1	1	0	0	0	1
1	12	1	1	2	0	0	0	0	0	2	3	0	7	5	2	1	0	2	0	0	0	0	1	0	2	0	0	2	1	0	1	0	0	1	1	0	0	0	2
1	11	1	1	6	0	0	0	0	0	1	1	0	9	2	2	1	0	1	0	0	1	0	2	0	2	0	0	2	0	0	2	0	0	2	2	0	0	0	2
1	12	1	1	4	0	0	1	6	3	1	5	2	8	11	2	2	0	1	0	0	1	2	2	1	2	0	0	1	1	1	2	0	1	1	2	0	0	0	1
0	12	1	1	8	1	7	1	1	1	2	2	0	9	5	2	0	1	2	1	0	1	0	2	0	2	0	0	2	0	0	2	0	0	1	1	0	0	0	1
1	12	1	1	7	1	5	1	4	2	4	3	1	6	10	1	0	0	1	2	0	1	1	1	0	2	1	0	1	1	0	2	0	0	1	1	0	0	1	1
1	12	1	1	2	0	0	0	0	2	1	3	0	8	6	2	0	0	1	0	0	1	0	2	0	2	0	1	2	1	1	2	0	0	1	1	0	0	0	1
0	12	1	1	6	0	0	1	4	3	2	2	0	8	7	2	1	1	1	2	0	2	0	2	0	2	0	0	2	1	1	2	0	0	1	2	0	0	1	2
0	12	1	1	7	1	7	0	0	2	3	2	0	9	7	2	0	0	2	1	0	1	1	2	1	2	0	1	2	0	0	2	1	0	1	1	0	0	0	2
1	12	1	1	6	0	0	1	5	4	6	8	0	8	18	2	2	1	1	2	0	1	1	2	1	2	1	0	2	2	2	2	1	0	1	0	1	0	0	1
1	12	1	1	8	0	1	0	0	7	5	1	5	8	18	2	0	1	2	2	1	1	2	1	0	1	1	1	1	0	2	1	1	0	2	1	0	2	1	2
0	11	1	1	2	1	5	1	3	0	3	3	2	6	8	1	1	0	1	0	0	1	0	1	0	1	1	0	1	0	0	2	1	0	1	1	0	0	0	1
1	11	1	1	8	0	3	1	2	3	1	5	1	7	10	1	2	2	1	0	0	1	0	1	0	2	0	0	2	1	1	2	0	1	2	1	0	0	0	1
1	12	1	1	7	1	6	1	9	2	2	5	2	6	11	2	1	0	1	1	0	1	1	1	2	2	0	0	2	1	1	1	0	0	1	1	0	2	0	2
1	12	1	1	8	0	0	0	0	1	1	2	0	9	4	2	1	0	1	0	0	1	1	2	0	2	0	0	2	0	0	2	0	0	2	1	0	0	0	2
0	13	1	1	10	1	7	1	5	9	3	7	1	8	20	1	2	2	1	2	1	1	2	2	2	2	0	1	2	1	2	2	0	0	2	1	0	0	2	1
0	12	1	1	7	0	2	1	5	2	2	4	3	9	11	2	0	1	1	0	0	0	1	2	1	2	0	0	2	0	0	2	0	1	2	1	0	2	0	0
1	11	1	1	9	0	0	0	0	6	3	2	1	9	12	2	1	1	2	0	0	1	2	2	0	2	0	1	2	0	1	2	1	0	1	2	1	1	1	1
0	12	1	1	8	1	9	0	0	7	5	5	5	9	22	2	1	2	2	2	1	1	2	2	1	2	1	1	1	2	1	2	1	2	1	2	0	1	1	1
1	11	1	1	5	0	2	1	5	0	1	6	2	9	9	2	2	0	1	0	0	1	0	2	1	2	0	0	1	0	0	2	0	0	2	0	0	1	0	1
0	12	1	0	5	0	4	0	0	1	3	1	0	8	5	2	0	0	1	1	0	1	1	2	0	2	0	0	2	0	0	2	0	0	1	2	1	0	0	1
0	12	1	1	6	0	2	0	0	8	1	5	5	8	19	2	1	0	2	0	1	1	2	1	1	1	0	2	1	1	2	2	0	1	1	1	0	1	2	1
1	11	1	1	7	0	0	1	5	4	2	5	3	5	14	1	0	0	1	1	1	1	2	1	1	2	0	0	1	1	1	1	0	1	1	0	0	0	1	1
1	11	1	1	4	0	6	1	2	4	2	5	3	6	14	1	2	0	1	0	0	1	2	1	0	2	0	1	1	1	1	2	1	0	1	1	0	2	0	1
1	11	1	1	10	1	10	1	10	0	1	1	1	8	3	2	1	0	2	1	0	2	0	1	0	2	0	0	2	0	0	2	0	1	1	2	0	0	0	2
1	12	1	1	4	0	0	0	0	8	1	4	2	9	15	2	1	0	1	0	0	1	2	2	1	2	0	2	2	0	2	2	0	2	2	1	0	0	2	1
1	12	1	1	2	0	0	1	1	2	1	1	1	10	5	2	1	0	2	0	0	1	2	2	0	2	0	0	2	0	0	2	0	0	2	2	0	1	0	2
1	11	1	0	0	0	0	1	5	0	0	1	1	9	2	2	0	0	2	0	0	2	0	2	0	2	0	0	2	1	0	2	0	0	1	2	0	1	0	2
0	11	1	1	10	1	6	1	10	6	2	2	3	8	13	2	2	1	2	1	0	2	0	1	0	2	1	2	2	0	1	2	0	1	1	2	0	2	2	2
0	12	1	0	0	0	0	1	2	5	4	4	1	10	14	2	1	1	2	1	0	1	2	2	2	2	0	1	2	0	0	2	2	1	2	1	0	0	1	2
0	11	1	1	9	0	0	1	7	9	5	8	2	9	24	2	2	1	2	2	0	1	2	2	1	2	1	2	2	1	2	2	1	1	1	0	0	1	2	0
1	10	1	0	0	0	0	0	0	6	0	0	2	10	8	2	0	1	2	0	0	2	2	2	0	2	0	1	2	0	0	2	0	0	2	2	0	2	2	2
0	10	1	0	2	1	6	1	4	5	2	4	2	8	13	0	1	0	2	1	0	1	2	2	1	2	0	1	2	1	1	2	0	0	2	2	0	2	1	1
1	11	1	0	6	0	0	0	0	2	1	1	3	9	7	2	0	1	1	1	0	2	1	2	0	2	0	0	1	1	0	2	0	1	2	2	0	1	0	2
1	12	1	0	5	0	2	0	0	3	3	3	1	7	10	2	0	0	1	1	0	1	1	1	1	2	1	1	1	0	0	2	0	0	1	1	0	0	1	1
1	11	1	1	9	1	7	1	4	2	3	1	1	8	7	1	0	0	2	1	0	1	2	1	0	2	0	0	2	0	0	2	1	0	2	2	0	1	0	1
1	11	1	0	0	1	4	1	7	2	3	5	2	9	12	2	1	2	2	0	0	1	0	2	0	2	0	0	1	2	0	2	1	1	1	1	1	0	0	1
1	10	1	0	5	0	1	0	0	0	2	1	1	9	4	2	0	0	2	1	0	1	0	1	0	2	0	0	2	0	0	2	0	0	2	2	0	1	0	1
1	11	1	1	5	0	0	1	2	2	1	1	1	7	5	2	1	0	1	1	0	2	1	1	0	2	0	0	2	0	0	2	0	0	1	2	0	1	1	2
1	11	1	1	7	0	0	0	0	3	1	1	2	5	7	1	0	0	1	0	1	1	1	1	0	2	0	1	1	0	1	1	0	0	1	2	0	0	0	1
1	12	1	1	7	0	1	0	2	3	1	3	0	10	7	2	0	0	2	0	0	2	1	2	0	2	1	0	2	1	0	2	0	0	2	1	0	0	2	1
1	11	1	0	0	0	0	0	0	0	1	2	1	5	4	0	0	0	1	0	0	1	0	1	0	2	0	0	1	0	0	2	0	0	1	1	0	0	0	1
1	12	1	0	10	0	10	1	10	2	1	6	0	10	9	2	1	2	2	0	0	1	0	2	2	2	0	0	2	2	0	2	0	0	2	2	0	0	0	1
0	12	1	1	4	1	3	0	0	4	3	3	1	10	11	2	1	0	2	1	1	2	1	2	2	2	1	2	2	0	1	2	0	0	2	2	1	0	0	2
0	12	1	1	6	1	4	0	0	1	1	2	0	7	4	2	1	0	1	0	0	1	0	1	0	2	0	0	2	0	1	2	0	0	1	2	0	0	0	1
1	11	1	1	9	1	9	1	10	0	0	2	0	6	2	2	1	0	1	0	0	2	0	1	0	2	0	0	2	0	0	2	0	0	0	2	0	0	0	1
0	12	1	1	9	0	0	0	0	5	3	7	2	5	17	1	2	0	1	0	0	0	2	1	1	2	0	2	1	2	1	2	0	0	0	1	1	1	0	1
1	11	1	1	6	0	0	0	0	3	2	4	0	8	9	2	1	0	1	1	0	1	2	2	0	2	0	0	2	1	1	2	0	0	1	1	0	0	0	1
1	11	1	1	9	0	0	1	9	5	2	1	1	6	9	1	0	1	1	1	0	2	1	1	0	2	0	0	1	0	2	2	1	0	1	2	0	0	1	1
1	13	1	0	0	0	0	0	0	4	0	3	0	6	7	2	1	0	2	0	0	2	0	0	0	2	0	2	2	2	0	2	0	0	0	2	0	0	2	2
1	13	1	0	0	0	0	0	0	4	0	3	0	6	7	2	1	0	2	0	0	2	0	0	0	2	0	2	2	2	0	2	0	0	0	2	0	0	2	2
1	12	1	1	7	0	6	0	5	1	2	5	3	8	11	1	0	1	2	0	0	0	0	1	1	2	0	0	2	0	0	2	0	1	2	0	0	2	0	0
0	11	1	1	10	1	8	1	4	1	2	3	5	8	11	1	0	1	1	1	1	1	0	2	0	0	0	0	1	1	0	2	0	1	2	1	0	0	0	1
1	12	1	1	1	0	0	1	2	0	0	0	0	8	0	2	0	0	1	0	0	2	0	2	0	2	0	0	2	0	0	2	0	0	1	2	0	0	0	2
1	11	1	1	6	1	3	1	1	3	4	2	1	8	10	2	1	0	1	1	0	1	0	2	0	2	1	1	2	1	2	2	0	0	1	2	1	1	0	2
1	12	1	0	7	0	5	0	0	1	1	3	0	9	5	2	1	0	1	0	0	1	1	2	0	2	0	0	2	0	0	2	0	0	2	1	0	0	0	1
1	12	1	0	0	0	0	0	0	2	1	1	0	10	4	2	1	0	2	0	0	1	0	2	0	2	0	2	2	0	0	2	0	0	2	2	0	0	0	2
1	11	1	1	9	1	5	1	10	0	1	0	1	8	2	2	0	0	1	0	0	1	0	2	0	2	0	0	2	0	0	2	0	0	1	2	0	1	0	2
1	11	1	1	6	0	0	0	0	1	0	3	2	10	6	2	0	1	2	0	1	2	0	2	0	2	0	0	1	1	0	2	0	0	2	2	0	0	0	0
0	11	1	1	10	0	0	0	0	2	0	0	0	10	2	2	0	0	2	0	0	2	1	2	0	2	0	0	2	0	0	2	0	0	2	2	0	0	1	2
0	12	1	1	6	0	9	0	10	6	1	2	4	9	13	2	0	1	2	1	1	2	1	2	1	2	0	2	1	0	1	2	0	1	1	2	0	1	1	1
0	11	1	0	5	0	4	1	6	0	3	2	0	5	5	1	0	0	1	1	0	1	0	1	0	2	1	0	2	0	0	2	0	0	0	1	0	0	0	1
1	12	1	1	3	0	0	1	2	2	1	3	0	7	6	2	0	0	1	0	0	1	1	1	0	2	0	1	2	1	0	2	0	0	1	1	0	0	0	1
1	11	1	1	5	0	0	1	4	1	1	4	0	6	6	1	1	0	1	0	0	1	0	1	0	2	0	0	2	1	1	2	0	0	1	1	0	0	0	1
1	10	1	1	8	1	6	1	3	4	6	9	2	7	21	1	2	2	2	1	1	0	1	1	1	2	0	0	1	2	1	2	1	0	1	0	2	0	0	0
0	11	1	1	6	0	7	1	3	3	2	5	2	10	12	2	1	0	2	1	0	1	2	2	0	1	0	1	1	2	0	2	0	0	2	1	0	0	0	1
0	12	1	0	0	0	1	0	0	3	0	1	1	8	5	2	0	0	2	0	0	2	0	1	1	2	0	1	1	0	2	2	0	0	1	2	0	0	0	2
1	12	1	1	5	0	5	1	6	2	2	5	2	10	11	2	1	1	2	1	0	2	1	2	1	2	0	0	1	1	0	2	0	1	2	1	1	0	0	1
0	11	1	1	3	0	0	0	0	8	10	10	10	0	38	0	2	1	0	2	2	0	2	0	2	0	2	2	0	2	1	0	2	2	0	0	2	2	2	0
0	11	1	1	3	1	3	1	1	2	2	3	2	6	9	2	1	1	0	1	0	2	0	0	1	1	0	0	2	0	0	2	1	0	2	1	0	1	1	2
1	11	1	1	4	1	7	1	7	1	0	0	0	10	1	2	0	0	2	0	0	2	0	2	0	2	0	1	2	0	0	2	0	0	2	2	0	0	0	2
0	12	1	1	8	1	4	1	3	1	1	4	0	9	6	1	1	0	2	0	0	1	0	2	1	2	0	0	2	0	1	2	0	0	2	1	0	0	0	1
0	11	1	0	6	0	0	1	1	1	1	2	0	7	4	1	1	0	0	0	0	1	1	2	0	2	0	0	2	0	0	2	0	0	2	2	0	0	0	1
0	11	1	0	6	0	0	1	1	1	1	2	0	7	4	1	1	0	0	0	0	1	1	2	0	2	0	0	2	0	0	2	0	0	2	2	0	0	0	1
1	11	1	1	2	0	0	0	0	0	1	3	0	8	4	1	2	0	1	0	0	1	0	2	1	2	0	0	2	0	0	2	0	0	2	2	0	0	0	2
0	11	1	0	0	1	5	1	4	4	3	5	6	8	18	1	2	1	2	1	1	2	1	1	0	1	0	0	1	1	2	2	2	2	2	1	0	1	0	1
1	12	1	1	10	0	0	1	10	3	3	2	0	6	8	2	1	0	1	2	0	1	2	1	0	2	0	0	2	0	0	1	0	0	1	2	0	0	1	1
0	11	1	1	10	1	9	0	8	3	6	8	4	6	21	1	2	0	2	0	0	0	1	1	1	2	2	1	1	2	1	2	2	1	0	0	0	2	0	1
0	12	1	1	5	0	0	1	3	3	3	6	0	10	12	2	2	1	2	1	0	1	1	2	1	2	0	1	2	1	0	2	1	0	2	1	0	0	0	1
0	11	1	0	2	0	0	0	0	3	3	6	1	10	13	2	2	0	2	2	0	1	2	2	1	2	0	0	2	1	0	2	0	0	2	1	0	1	1	1
0	12	1	0	4	0	0	0	0	0	1	4	0	8	5	2	1	0	1	0	0	1	0	2	1	2	0	0	2	0	0	2	0	0	1	1	0	0	0	1
1	12	1	1	9	1	8	1	7	0	2	5	4	7	11	2	0	0	1	0	1	0	0	1	2	1	0	0	1	1	0	2	0	0	1	1	0	1	0	1
0	11	1	1	5	0	0	0	0	1	0	2	0	8	3	2	0	1	2	0	0	2	0	1	0	2	0	0	2	0	0	2	0	0	1	1	0	0	0	1
0	12	1	0	3	0	0	1	8	4	4	3	4	9	15	2	0	0	1	1	0	1	2	2	0	0	1	1	1	1	1	2	1	1	2	2	0	0	0	0
0	11	1	0	6	0	2	1	3	5	3	5	1	6	14	2	2	1	1	1	0	1	2	1	2	2	1	1	2	1	0	1	0	1	1	2	0	0	1	2
1	11	1	0	4	0	10	1	6	1	2	4	8	7	15	2	1	0	0	2	2	2	1	2	1	0	0	0	0	1	0	2	0	1	1	2	0	1	0	1
1	12	1	0	1	0	0	0	0	0	2	2	1	7	5	2	0	0	1	1	0	1	0	1	0	2	0	0	2	1	0	2	0	0	1	2	0	1	0	1
1	11	1	0	3	0	0	1	2	2	2	2	3	7	9	1	0	0	1	2	1	2	1	2	0	1	0	1	1	0	0	2	0	0	1	1	0	0	0	1
0	12	1	1	4	1	2	0	0	0	1	2	0	9	3	2	1	0	2	0	0	1	0	2	0	2	0	0	2	0	0	2	0	0	1	2	0	0	0	1
0	11	1	0	0	0	0	1	0	0	2	7	0	5	9	2	1	0	1	0	0	0	0	0	0	2	0	0	2	2	0	2	0	0	0	0	0	0	0	0
0	11	1	1	4	0	0	1	1	3	2	2	1	5	8	1	0	0	1	1	0	1	1	1	0	2	0	0	1	0	2	1	0	0	1	1	0	0	0	1
1	11	1	0	3	1	10	1	1	3	2	1	3	7	9	1	0	2	1	0	0	0	0	2	0	0	0	0	2	0	1	2	0	1	1	2	0	0	0	1
1	12	1	1	5	0	0	0	0	2	1	4	3	10	10	2	0	0	2	0	1	2	0	2	1	2	0	0	1	1	1	2	1	0	2	1	0	1	1	1
0	12	1	1	1	1	1	1	1	2	0	0	1	8	3	2	0	0	1	0	1	2	0	2	0	2	0	1	2	0	1	2	0	0	1	2	0	0	0	2
0	12	1	1	8	1	7	1	9	8	4	6	3	9	21	2	2	1	2	2	0	1	2	2	2	2	1	2	2	1	2	2	0	1	1	2	0	2	1	1
0	12	1	1	7	0	0	0	0	4	1	1	1	8	7	2	1	2	1	0	0	2	1	1	0	2	0	0	1	0	1	2	1	0	2	2	0	0	0	2
1	12	1	1	6	1	6	1	8	6	5	10	2	6	23	1	2	0	1	2	0	1	2	1	2	2	0	1	1	2	1	2	1	0	1	0	1	1	2	0
0	12	1	1	4	1	2	1	4	5	3	3	0	10	11	2	0	0	2	1	0	1	1	2	0	2	0	2	2	1	1	2	0	0	2	1	1	0	1	1
1	12	1	1	1	0	0	0	0	2	3	1	6	9	12	2	0	0	1	0	0	0	1	2	0	1	0	1	0	1	0	2	1	2	2	2	0	1	0	2
1	12	1	0	7	1	7	1	7	0	1	3	2	10	6	2	1	0	2	0	0	1	0	2	0	2	0	0	0	0	0	2	0	0	2	1	0	0	0	1
1	11	1	0	0	0	0	1	3	0	1	4	3	7	8	1	0	0	2	0	0	1	0	1	0	1	0	0	1	1	0	2	0	0	1	0	0	1	0	1
1	12	1	0	0	0	0	0	0	0	0	1	0	8	1	2	0	0	1	0	0	2	0	2	0	2	0	0	2	0	0	2	0	0	1	1	0	0	0	2
0	10	1	0	2	0	0	1	3	1	1	6	4	6	12	2	1	0	1	1	1	2	1	1	2	2	0	0	0	1	0	1	0	1	1	1	0	0	0	1
0	11	1	1	6	1	1	1	6	6	2	2	2	9	12	2	0	1	1	1	0	1	2	2	0	2	0	1	2	1	0	2	0	1	2	2	0	1	2	1
0	11	1	0	4	0	0	0	3	1	1	1	2	10	5	2	0	0	2	0	0	1	0	2	0	2	0	0	1	0	1	2	0	1	2	2	0	0	0	1
0	12	1	1	7	1	10	1	7	3	3	4	1	8	11	2	1	1	1	2	0	1	1	2	0	2	0	1	1	1	0	2	0	0	1	1	0	0	0	1
0	11	1	1	6	0	0	0	0	2	2	6	0	5	10	1	2	2	0	0	0	1	0	1	0	2	1	0	2	1	0	2	0	0	1	0	0	0	0	1
0	12	1	0	0	0	0	1	2	0	1	2	0	7	3	2	0	0	1	0	0	1	0	1	0	2	0	0	2	0	0	2	0	0	1	1	0	0	0	1
1	11	1	1	7	1	5	1	4	0	1	4	1	9	6	2	1	0	2	0	0	1	0	1	0	2	0	0	1	0	0	2	0	0	2	1	0	0	0	0
0	11	1	1	10	1	6	1	9	1	4	5	0	8	10	2	1	0	2	1	0	0	0	1	1	2	1	0	2	0	0	2	0	0	1	1	0	0	1	0
0	11	1	1	6	1	6	0	0	6	4	5	0	5	15	1	1	2	0	1	0	1	1	1	0	2	1	1	2	1	1	2	1	0	1	0	0	0	1	1
1	11	1	1	8	0	0	1	3	4	1	3	1	6	9	1	1	1	1	0	0	1	0	2	0	2	0	0	1	2	2	1	0	0	1	2	0	0	1	2
0	12	1	1	7	1	4	1	1	9	4	5	6	10	24	2	0	2	2	2	1	1	2	2	1	1	0	2	1	2	1	2	1	2	2	1	0	1	2	1
0	12	1	1	9	1	7	1	6	5	2	3	1	10	11	2	1	0	2	1	0	1	2	2	1	2	0	2	2	0	1	2	0	0	2	1	0	1	0	2
1	11	1	0	6	1	4	1	1	3	4	5	2	9	14	2	1	2	2	1	1	1	1	2	1	2	0	0	2	1	0	2	2	0	1	1	0	1	0	1
0	12	1	1	4	1	2	0	0	1	1	3	1	8	6	2	0	0	1	0	0	1	0	2	1	2	0	1	1	1	0	2	0	0	1	2	0	0	0	1
1	12	1	1	7	0	0	0	0	2	3	1	1	8	7	2	0	0	1	1	0	1	0	2	0	2	1	1	2	0	0	2	0	0	1	1	0	1	1	2
1	11	1	0	0	0	0	1	1	0	2	3	2	5	7	0	0	0	1	1	0	1	0	1	1	2	0	0	1	0	0	2	0	0	1	1	0	1	0	1
0	11	1	1	7	1	6	1	4	0	2	2	0	9	4	2	0	0	2	0	0	0	0	2	0	2	0	0	2	0	0	2	0	0	1	1	0	0	0	1
1	12	1	0	0	0	0	0	0	3	0	3	3	8	9	2	0	0	1	0	1	2	0	2	0	1	0	1	1	0	2	2	0	0	1	0	0	0	0	1
1	11	1	1	10	1	10	0	10	2	3	2	3	7	10	2	0	0	2	1	0	2	1	0	0	2	0	0	2	1	1	2	2	1	1	2	0	2	0	1
1	11	1	1	8	1	8	1	7	0	2	3	2	8	7	2	0	0	2	0	0	0	0	2	1	1	0	0	1	0	0	2	0	0	0	1	0	0	0	1
1	11	1	1	8	1	8	1	7	0	2	3	2	8	7	2	0	0	2	0	0	0	0	2	1	1	0	0	1	0	0	2	0	0	0	1	0	0	0	1
1	11	1	1	1	0	0	0	0	0	1	0	0	8	1	2	0	0	1	0	0	1	0	2	0	2	0	0	2	0	0	2	0	0	1	2	0	0	0	2
0	12	1	1	7	0	0	1	3	5	1	1	0	8	7	2	0	2	2	1	0	2	1	1	0	2	0	0	2	0	1	2	0	0	1	1	0	0	1	2
0	11	1	1	4	1	5	1	2	8	2	6	0	8	16	1	1	2	2	1	0	1	2	2	0	2	0	0	2	2	2	2	0	0	1	1	0	0	2	0
1	11	1	1	4	1	5	0	0	0	2	1	1	6	4	1	0	0	2	0	0	1	0	1	0	2	0	0	1	0	0	0	1	0	2	1	0	0	0	2
1	11	1	0	0	1	1	1	1	4	4	5	0	7	13	1	1	0	2	1	0	1	1	1	1	2	0	1	2	2	1	2	2	0	1	2	0	0	1	1
0	12	1	0	5	1	7	1	4	6	1	2	2	9	11	2	1	2	2	0	0	1	1	2	0	2	0	0	2	0	2	2	0	0	1	1	0	2	1	2
1	12	1	1	6	0	0	1	1	0	1	4	1	8	6	2	1	0	1	0	0	1	0	2	0	2	0	0	1	1	0	2	0	0	1	1	0	0	0	1
1	12	1	1	5	0	0	0	0	0	2	4	3	7	9	1	1	0	1	0	0	1	0	1	0	2	0	0	1	2	0	2	1	0	2	2	0	2	0	1
1	11	1	1	7	1	6	0	0	0	1	2	0	9	3	2	1	0	2	0	0	1	0	1	0	2	0	0	2	0	0	2	0	0	2	1	0	0	0	2
0	11	1	1	7	0	7	0	0	1	4	6	2	6	13	1	1	0	1	1	0	1	1	1	2	2	0	0	2	0	0	2	1	2	1	0	1	0	0	1
0	11	1	1	4	0	0	1	1	1	1	4	0	9	6	2	2	0	1	0	0	2	0	2	0	2	0	0	2	0	0	2	0	0	2	1	1	0	1	1
1	12	1	1	4	1	2	1	1	2	1	3	2	7	8	2	0	0	1	0	0	1	1	1	0	2	0	1	1	1	0	2	0	1	1	1	0	0	0	1
1	12	1	1	9	1	8	1	8	3	1	6	0	9	10	2	1	1	1	0	0	2	0	2	1	2	0	0	2	2	1	2	1	0	2	1	0	0	1	1
0	11	1	1	8	1	6	0	4	2	3	3	3	6	11	2	1	0	1	1	1	1	1	1	0	2	0	0	1	0	1	1	0	0	1	1	1	1	0	1
0	11	1	0	3	0	0	0	0	0	1	0	2	10	3	2	0	0	2	0	1	1	0	2	0	2	0	0	2	0	0	2	0	0	2	2	0	1	0	2
0	11	1	1	8	1	10	1	7	10	8	5	4	6	27	2	1	2	2	2	0	0	2	2	1	1	2	2	1	2	2	0	2	2	0	2	0	0	2	1
1	12	1	1	10	1	7	1	3	3	3	5	2	8	13	1	2	2	1	1	0	1	0	2	0	2	1	0	2	1	1	2	0	0	2	1	0	2	0	1
1	12	1	1	7	0	0	1	3	7	5	4	8	9	24	2	1	0	2	2	2	1	2	2	1	0	0	2	0	0	2	2	1	1	1	1	1	1	1	1
1	12	1	1	6	0	1	0	0	10	5	2	4	10	21	2	1	2	2	2	0	2	2	2	1	2	1	2	1	0	2	2	2	1	2	2	0	2	2	2
1	11	1	0	0	0	0	1	3	0	3	2	3	5	8	1	0	0	1	0	1	1	0	0	0	2	0	0	2	0	0	1	1	1	2	2	1	1	0	0
0	11	1	1	6	0	0	0	0	3	0	2	2	9	7	2	1	0	1	0	2	2	0	2	0	2	0	0	2	0	2	2	0	0	2	2	0	0	1	1
0	12	1	1	7	1	8	1	6	4	2	5	1	10	12	2	1	0	2	1	0	1	1	2	1	2	0	1	2	1	1	2	0	0	2	1	0	1	1	1
0	12	1	1	6	1	7	1	7	2	1	1	0	10	4	2	0	0	2	1	0	2	0	2	0	2	0	1	2	1	1	2	0	0	2	2	0	0	0	2
1	11	1	1	5	0	0	0	0	1	3	3	3	8	10	2	0	0	1	2	1	2	0	2	1	2	0	0	1	2	1	2	1	1	1	2	0	0	0	2
0	12	1	1	7	1	8	0	0	6	2	1	0	8	9	2	1	2	1	1	0	1	1	2	0	2	0	1	2	0	1	2	0	0	1	2	0	0	1	2
0	11	1	1	2	0	0	0	0	2	2	6	1	10	11	2	1	2	2	1	0	1	0	2	1	2	0	0	1	2	0	2	0	0	2	1	0	0	0	1
1	12	1	1	6	0	0	0	0	0	1	0	1	8	2	2	0	0	1	0	0	1	0	2	0	2	0	0	2	0	0	2	0	0	1	2	0	1	0	2
1	11	1	1	8	0	0	0	0	0	1	2	0	7	3	1	1	0	2	0	0	1	0	2	0	2	0	0	2	0	0	2	0	0	0	2	0	0	0	1
0	11	1	1	7	1	2	1	10	2	2	3	0	10	7	2	1	1	2	0	0	1	0	2	0	2	0	0	2	1	0	2	1	0	2	1	0	0	1	2
0	11	1	1	4	0	0	1	4	3	1	0	3	10	7	2	0	0	2	0	0	1	1	2	0	1	0	1	1	0	1	2	0	0	2	2	0	1	0	2
0	11	1	1	6	1	2	0	9	2	1	2	1	7	6	1	0	0	2	0	0	1	1	1	0	2	0	0	1	0	1	2	0	0	1	1	0	0	0	1
0	11	1	0	2	1	3	1	4	7	2	3	5	9	17	2	1	1	1	1	2	2	2	2	1	2	0	2	1	0	1	2	0	0	2	2	1	2	1	1
1	12	1	1	5	0	0	1	2	0	2	6	2	8	10	1	2	0	2	0	0	1	0	1	0	1	0	0	2	1	0	2	1	0	2	0	0	1	0	1
0	12	1	1	9	1	8	1	7	1	3	5	1	7	10	1	1	0	2	1	0	1	1	1	0	2	1	0	2	1	0	2	0	0	1	1	0	1	0	0
0	12	1	1	6	1	6	0	0	5	2	4	2	10	13	2	1	1	2	1	0	1	1	2	1	1	0	1	1	0	0	2	0	0	2	1	0	0	2	1
0	11	1	0	10	1	10	0	10	0	1	5	0	5	6	2	2	0	1	0	0	1	0	1	0	2	0	0	2	1	0	0	0	0	1	1	0	0	0	1
1	10	1	0	5	0	3	1	6	2	1	0	1	8	4	2	0	0	1	1	1	2	1	2	0	2	0	0	2	0	0	2	0	0	1	2	0	0	1	2
1	11	1	1	8	1	8	0	0	0	1	2	2	7	5	2	0	0	1	0	0	1	0	1	0	2	0	0	2	0	0	2	0	0	1	0	0	2	0	2
1	11	1	1	7	1	9	0	0	1	1	4	3	6	9	2	1	0	0	0	2	1	0	1	0	2	0	0	1	0	1	2	0	0	1	0	0	0	0	1
1	11	1	1	4	0	0	0	0	6	2	5	3	10	16	2	1	0	2	1	0	2	2	2	1	2	0	1	1	1	2	2	1	1	2	1	0	1	1	1
0	11	1	1	5	1	9	1	4	7	4	8	3	6	22	1	2	2	1	2	0	1	2	1	2	2	1	2	1	2	1	2	0	0	1	2	0	2	0	0
0	11	1	1	10	1	1	0	0	4	2	5	2	10	13	2	2	1	2	2	0	2	2	2	2	2	0	0	2	0	1	2	0	0	2	2	0	2	0	1
1	12	1	0	1	0	2	0	0	4	5	1	7	10	17	2	0	0	2	2	2	2	2	2	1	2	0	2	0	0	0	2	2	2	2	2	1	1	0	2
0	11	1	0	1	0	0	1	2	2	1	3	1	8	7	2	1	0	1	0	0	1	1	2	0	2	0	0	1	1	1	2	0	0	1	2	0	0	0	1
1	13	1	1	2	0	2	1	2	4	4	5	3	8	16	2	1	0	2	1	0	2	2	2	1	1	2	0	2	2	2	2	1	0	0	2	0	2	0	1
0	11	1	1	3	1	2	1	2	3	2	1	2	7	8	2	0	1	1	0	1	2	1	1	0	2	1	0	2	0	0	1	0	0	2	1	1	1	1	2
1	11	1	1	4	0	0	1	1	0	2	3	0	9	5	2	0	0	2	0	0	1	0	2	0	2	0	0	2	0	0	2	0	0	1	1	1	0	0	0
0	11	1	1	3	1	2	1	3	5	3	5	2	9	15	2	1	1	1	2	1	1	1	2	1	2	0	1	1	1	1	2	0	0	2	1	0	0	1	1
0	11	1	0	0	0	0	1	4	4	3	2	2	8	11	1	0	0	2	2	0	1	0	1	0	2	0	1	1	0	1	2	0	1	2	1	0	0	2	1
0	12	1	1	9	1	9	1	8	5	4	7	0	10	16	2	2	1	2	1	0	1	1	2	1	2	1	1	2	2	1	2	1	0	2	1	0	0	1	1
1	11	1	0	0	0	0	0	0	0	2	2	1	6	5	1	0	0	1	1	0	1	0	2	0	2	0	0	1	0	0	1	0	0	1	1	0	0	0	1
0	10	1	0	2	0	1	1	1	4	0	2	3	9	9	2	0	1	1	0	1	2	1	2	0	2	0	1	1	2	0	2	0	1	2	2	0	0	1	2
0	12	1	1	7	1	10	1	6	2	5	7	1	3	15	1	1	0	1	1	0	0	1	1	1	2	1	1	2	1	0	0	1	1	0	0	0	0	0	0
0	11	1	0	2	0	0	1	1	8	4	3	5	6	20	2	0	1	1	2	1	1	2	1	1	2	0	2	0	0	1	2	1	1	0	2	0	1	2	0
1	12	1	1	9	1	8	1	7	5	3	1	3	6	12	2	0	1	1	1	1	0	1	0	0	2	0	1	1	0	1	2	0	1	1	2	0	0	1	1
1	12	1	0	0	0	0	0	0	4	6	7	2	7	19	1	2	1	2	2	0	1	1	1	1	2	1	1	1	2	1	2	2	1	1	1	0	0	0	1
0	12	1	1	9	1	10	1	7	4	3	4	5	8	16	2	2	1	2	1	1	1	2	0	0	0	1	1	1	0	0	2	0	0	2	1	0	1	0	1
0	12	1	1	8	0	1	0	0	4	4	1	4	10	13	2	1	1	2	1	1	0	1	2	0	2	0	0	1	0	1	2	1	1	2	2	0	1	1	2
0	11	1	1	7	1	8	0	0	3	3	5	1	10	12	2	1	0	2	2	0	1	1	2	0	2	0	0	1	1	1	2	0	0	2	1	0	0	1	0
0	11	1	0	0	1	0	0	0	4	3	6	3	5	16	1	1	1	1	1	0	0	1	1	0	1	0	0	1	1	1	1	0	1	1	0	0	0	1	0
0	12	1	1	8	1	4	1	7	3	1	2	0	8	6	2	0	0	1	0	0	1	1	2	1	2	0	0	2	0	1	2	0	0	1	1	0	0	1	2
0	10	1	1	5	1	5	1	2	5	2	5	0	10	12	2	2	0	2	1	0	1	1	2	1	2	0	1	2	1	2	2	0	0	2	1	0	0	1	2
1	12	1	1	7	1	9	0	0	3	1	2	0	10	6	2	0	1	2	0	0	1	1	2	1	2	0	0	2	1	0	2	0	0	2	2	0	0	1	2
1	12	1	1	2	0	0	1	2	4	3	2	0	6	9	1	0	2	1	0	0	1	1	1	0	2	0	1	2	1	0	2	1	0	1	1	1	0	0	2
0	12	1	1	5	0	0	1	8	3	1	4	0	10	8	2	2	0	2	1	0	2	0	2	2	2	0	1	2	0	1	2	0	0	2	2	0	0	1	2
0	12	1	1	2	1	10	1	2	8	2	4	1	6	15	1	1	1	1	1	0	2	2	1	1	2	0	2	2	0	1	2	0	0	1	1	1	1	2	1
0	12	1	1	10	1	5	1	10	5	3	3	1	9	12	2	1	0	1	1	0	1	1	2	1	2	0	1	2	0	2	2	0	1	2	1	1	0	1	2
1	11	1	0	6	0	3	0	1	0	3	3	1	5	7	1	0	0	1	0	0	1	0	1	0	2	1	0	1	1	0	1	0	0	1	1	1	0	0	1
1	10	1	1	9	1	7	0	0	2	1	4	3	7	10	2	1	0	1	0	0	2	1	1	0	2	1	0	1	1	0	1	0	1	2	1	0	1	1	1
1	11	1	0	3	0	2	0	0	1	2	2	0	10	5	2	1	1	2	0	0	1	0	2	0	2	0	0	2	0	0	2	1	0	2	2	0	0	0	1
1	11	1	1	1	0	0	0	0	2	1	6	0	6	9	1	2	0	1	0	0	1	1	1	0	2	0	0	2	1	1	2	0	0	1	1	0	0	0	0
1	11	1	0	5	0	0	0	0	1	2	3	0	5	6	1	1	0	1	1	0	1	1	1	0	2	0	0	2	0	0	2	0	0	0	1	0	0	0	1
0	11	1	0	0	0	0	0	0	2	2	0	1	8	5	2	0	0	1	0	0	1	0	1	0	2	0	0	2	0	1	2	1	1	2	2	0	0	1	2
1	10	1	1	6	1	6	0	0	1	0	3	0	10	4	2	2	0	2	0	0	2	1	2	0	2	0	0	2	1	0	2	0	0	2	2	0	0	0	2
1	10	1	1	3	0	1	0	0	3	6	2	2	10	13	2	1	0	2	2	0	1	2	2	1	2	1	1	2	0	0	2	2	0	2	2	0	2	0	2
1	10	1	1	3	0	0	0	0	2	1	3	1	9	7	2	1	1	2	1	0	2	0	1	0	2	0	0	2	0	1	2	0	0	2	1	0	1	0	1
1	11	1	1	7	0	0	0	1	0	2	2	2	7	6	2	1	0	1	0	0	0	0	1	0	2	0	0	2	0	0	2	0	0	1	1	0	2	0	2
0	10	1	0	1	0	0	0	0	0	0	0	0	10	0	2	0	0	2	0	0	2	0	2	0	2	0	0	2	0	0	2	0	0	2	2	0	0	0	2
0	10	1	0	2	0	0	0	1	2	1	4	0	10	7	2	1	2	2	0	0	1	0	2	0	2	0	0	2	1	0	2	0	0	2	1	0	0	0	1
0	11	1	1	8	1	9	1	6	2	1	1	0	10	4	2	0	0	2	0	0	1	0	2	0	2	0	1	2	0	1	2	0	0	2	2	0	0	0	1
1	10	1	0	5	0	0	0	0	2	0	3	3	10	8	2	0	0	2	0	2	2	1	2	1	2	0	1	1	0	0	2	0	0	2	0	0	0	0	2
0	11	1	1	8	0	0	0	0	10	4	9	5	9	28	2	2	2	2	2	2	1	2	2	2	2	0	2	1	2	2	2	1	0	1	0	0	2	2	1
0	11	1	0	4	0	0	0	0	1	0	1	1	8	3	1	0	0	1	0	0	2	0	2	0	2	0	0	1	0	0	2	0	0	2	1	0	0	1	2
0	12	1	1	5	1	5	0	0	0	1	2	2	7	5	1	0	0	1	0	0	1	0	2	0	2	0	0	1	1	0	2	0	0	1	2	0	1	0	1
1	11	1	0	1	0	0	0	0	1	0	0	5	8	6	2	0	1	1	0	1	2	0	1	0	2	0	0	2	0	0	2	0	2	2	2	0	2	0	2
0	11	1	0	8	0	0	1	9	2	1	1	0	10	4	2	1	1	2	1	0	2	0	2	0	2	0	0	2	0	1	2	0	0	2	2	0	0	0	2
0	11	1	0	8	0	1	1	9	5	1	2	2	10	10	2	0	1	2	0	0	2	2	2	0	2	0	0	2	2	1	2	1	0	2	2	0	2	1	2
1	11	1	1	10	0	0	1	5	0	2	5	3	8	10	2	1	0	1	0	1	0	0	2	0	2	0	0	2	2	0	2	0	0	1	1	0	2	0	1
0	11	1	0	3	1	10	0	2	5	4	6	1	5	16	0	0	1	0	1	0	1	1	2	2	2	0	1	1	2	0	2	2	0	1	2	0	0	2	0
1	10	1	1	10	1	10	1	10	0	1	4	2	6	7	1	1	0	0	0	0	1	0	2	1	2	0	0	1	1	0	2	0	0	1	2	0	1	0	1
1	12	1	0	0	0	0	0	0	2	3	4	2	10	11	2	0	1	2	0	0	1	1	2	2	2	0	0	2	1	0	2	2	0	2	2	0	2	0	1
1	11	1	1	8	0	0	1	5	1	1	2	2	8	6	2	0	0	1	0	0	1	1	2	0	1	0	0	2	0	0	1	0	0	2	1	0	1	0	1
1	12	1	1	5	0	0	1	6	2	2	5	3	7	12	2	1	1	1	1	1	2	0	1	1	2	0	0	1	1	1	2	0	0	1	1	1	1	0	1
1	12	1	1	7	0	4	1	5	2	1	5	3	7	11	2	1	0	1	1	1	2	1	1	1	1	0	0	2	1	1	1	0	0	2	1	0	1	0	1
1	12	1	1	6	1	7	1	8	0	2	5	3	3	10	0	2	0	0	0	0	1	0	1	0	1	0	0	2	1	0	1	1	0	1	0	0	2	0	2
1	12	1	1	6	1	7	1	8	0	2	5	3	3	10	0	2	0	0	0	0	1	0	1	0	1	0	0	2	1	0	1	1	0	1	0	0	2	0	2
1	11	1	0	3	1	2	1	4	7	3	4	1	8	15	2	1	0	1	2	0	1	2	2	1	2	0	2	1	1	2	2	0	0	1	1	0	0	1	2
0	12	1	1	7	1	4	1	9	7	5	2	4	7	18	1	1	0	1	0	1	0	2	2	1	1	1	1	1	0	2	2	1	0	1	2	1	1	2	2
1	12	1	0	2	0	4	0	3	1	4	6	4	1	15	0	1	0	1	1	0	0	0	0	1	0	0	0	0	1	1	0	0	0	0	1	1	0	0	0
1	12	1	1	5	1	5	1	2	0	1	3	3	7	7	1	0	0	2	0	0	1	0	1	1	2	0	0	1	1	0	2	0	0	1	2	0	2	0	1
1	12	1	0	9	1	5	1	5	0	2	5	4	2	11	0	1	0	0	0	0	0	0	2	0	0	0	0	0	0	0	0	0	0	0	0	0	0	0	0
1	12	1	1	4	1	3	1	2	5	1	2	2	8	10	1	0	0	2	0	0	1	1	2	0	2	0	1	1	1	2	2	0	0	1	2	0	1	1	1
0	12	1	1	8	1	7	1	10	0	2	3	1	10	6	2	0	0	2	1	0	1	0	2	1	2	0	0	1	0	0	2	0	0	2	1	0	0	0	1
0	11	1	1	10	1	8	0	0	0	2	7	0	6	9	1	2	0	2	0	0	1	0	1	1	2	1	0	2	1	0	1	0	0	1	1	0	0	0	0
0	12	1	1	8	1	2	1	10	2	1	4	3	8	10	2	2	0	1	0	0	1	0	2	0	2	0	1	1	0	0	2	0	2	1	1	0	0	1	1
1	12	1	1	4	1	3	1	4	0	1	4	1	10	6	2	1	0	2	0	0	1	0	2	1	2	0	0	2	0	0	2	0	1	2	1	0	0	0	1
1	12	1	0	4	1	6	1	2	1	1	2	3	6	7	1	0	0	1	0	0	1	0	1	0	1	0	0	1	0	1	2	0	0	1	1	0	1	0	1
1	12	1	0	5	1	8	1	4	3	1	2	2	7	8	1	0	1	1	0	0	1	1	1	0	2	0	0	1	0	1	2	0	0	2	1	0	1	0	1
0	12	1	1	8	1	7	1	9	6	3	4	4	7	17	2	1	2	1	1	0	1	1	0	0	2	0	1	0	2	1	2	1	1	2	2	0	1	1	1
1	13	1	1	8	0	0	1	10	1	6	4	3	10	14	2	0	0	2	2	0	0	0	2	0	2	1	0	2	1	1	2	1	2	2	0	0	1	0	1
1	12	1	1	9	0	0	1	3	0	1	2	1	10	4	2	1	0	2	0	1	2	0	2	1	2	0	0	2	0	0	2	1	0	2	2	0	0	0	2
1	12	1	1	8	1	7	1	7	2	0	2	4	8	8	2	0	0	2	0	1	2	0	2	0	2	0	1	0	0	1	0	0	0	2	1	0	1	0	1
0	12	1	1	10	1	8	0	0	0	2	4	4	1	10	1	0	0	0	0	0	0	0	0	0	0	0	0	0	0	0	0	0	0	0	0	0	0	0	0
1	12	1	0	0	1	7	1	7	1	1	1	0	10	3	2	0	1	2	0	0	1	0	2	0	2	0	0	2	1	0	2	0	0	2	2	0	0	0	2
1	12	1	1	8	1	7	1	6	2	4	3	8	10	17	2	1	1	2	0	1	0	1	2	0	1	0	0	0	0	0	2	2	2	2	0	0	2	0	2
1	12	1	1	6	1	3	1	2	3	3	3	4	8	13	1	1	0	1	1	0	1	1	2	1	0	0	1	2	0	0	2	1	0	2	2	0	2	1	1
0	11	1	1	7	1	9	1	9	2	0	2	0	9	4	2	0	0	2	0	0	2	0	2	0	2	0	0	2	1	1	2	0	0	1	2	0	0	1	1
1	12	1	0	0	0	0	0	0	1	0	2	0	8	3	2	1	0	2	0	0	2	1	1	0	2	0	0	2	0	0	2	0	0	1	2	0	0	0	1
0	12	1	1	6	1	2	1	6	3	2	2	1	8	8	2	0	0	1	1	0	1	0	1	1	2	0	1	1	0	2	2	0	0	2	2	0	0	0	1
1	12	1	1	3	1	9	1	10	2	4	4	1	7	11	2	1	1	1	1	0	1	1	2	0	1	2	0	2	1	0	2	0	0	0	1	0	0	0	1
1	12	1	1	10	1	6	1	4	4	7	7	0	6	18	1	2	0	2	1	0	0	2	1	0	2	1	1	2	2	0	2	1	0	0	0	2	0	1	1
0	12	1	0	0	1	2	0	0	1	1	3	2	10	7	2	0	0	2	0	0	1	0	2	0	2	0	0	2	0	0	2	0	0	2	0	0	2	1	1
0	12	1	1	10	1	10	1	5	4	2	3	3	10	12	2	1	0	2	1	0	1	1	2	1	2	0	1	1	1	1	2	0	1	2	2	0	1	1	2
0	13	1	1	0	0	3	1	0	3	1	1	2	7	7	1	1	0	2	0	0	2	1	1	0	2	0	0	1	0	0	2	1	0	1	2	0	1	2	2
0	12	1	1	9	1	8	1	4	1	2	1	0	9	4	2	0	0	2	1	0	1	0	1	0	2	0	1	2	0	0	2	0	0	2	1	0	0	0	2
0	12	1	1	10	1	5	1	10	4	6	7	0	7	17	1	2	0	2	2	0	0	2	1	0	2	2	2	2	1	0	2	0	0	1	0	0	0	0	0
0	13	1	1	10	1	10	1	9	0	2	4	0	7	6	1	2	0	2	0	0	0	0	1	0	2	0	0	2	1	0	2	0	0	1	2	0	0	0	1
1	12	1	0	5	0	2	1	3	7	6	8	7	9	28	2	1	1	1	2	1	0	2	2	2	2	0	1	0	2	2	2	2	2	2	1	0	2	1	0
0	12	1	0	5	0	3	0	0	0	0	0	0	10	0	2	0	0	2	0	0	2	0	2	0	2	0	0	2	0	0	2	0	0	2	2	0	0	0	2
1	12	1	0	0	0	0	1	2	3	2	4	2	8	11	0	1	0	2	0	0	1	1	2	1	2	0	1	0	0	0	2	1	0	2	1	0	0	1	1
1	12	1	1	7	1	3	1	3	1	2	5	1	6	9	1	0	0	2	1	0	1	1	1	2	2	0	0	1	1	0	1	0	0	1	1	0	0	0	1
0	11	1	1	10	1	9	1	10	9	3	6	2	10	20	2	2	1	2	1	0	1	2	2	2	2	0	2	2	2	2	2	1	0	2	2	0	2	2	2
0	12	1	0	4	1	3	0	0	1	0	1	2	6	4	0	0	0	1	0	0	2	1	1	0	2	0	0	1	0	0	2	0	0	2	2	0	1	0	1
1	12	1	1	7	1	2	0	0	3	2	3	1	10	9	2	1	0	2	1	0	1	1	2	1	2	0	1	2	0	1	2	0	0	2	1	0	1	0	2
0	12	1	0	5	0	4	1	7	0	0	1	1	9	2	2	0	0	2	0	0	2	0	2	0	2	0	0	1	0	0	2	0	0	1	2	0	0	0	1
1	12	1	1	1	0	1	0	1	0	0	0	0	8	0	2	0	0	0	0	0	2	0	2	0	2	0	0	2	0	0	2	0	0	2	2	0	0	0	2
1	12	1	1	2	0	1	0	0	4	5	4	4	5	17	0	0	1	0	1	1	0	0	1	1	2	1	1	2	2	1	2	0	2	2	1	1	1	1	2
1	12	1	1	9	0	4	1	5	3	4	7	3	2	17	0	1	1	0	1	0	0	0	0	1	1	0	0	2	2	1	1	0	0	1	1	1	2	1	0
1	12	1	0	1	0	0	0	0	1	0	0	2	9	3	2	0	0	2	0	0	2	0	2	0	2	0	0	2	0	1	2	0	0	1	2	0	2	0	2
0	12	1	1	7	0	1	0	0	6	2	7	1	8	16	2	1	1	2	0	0	1	1	1	2	2	0	2	1	1	0	2	1	0	1	1	0	0	2	0
0	12	1	1	7	1	10	0	0	1	2	3	2	6	8	1	0	0	2	0	0	1	0	1	0	2	0	0	0	0	1	2	1	0	0	1	0	0	0	0
0	11	1	0	0	1	5	1	3	1	0	3	0	10	4	2	0	0	2	0	0	2	0	2	1	2	0	1	2	0	0	2	0	0	2	1	0	0	0	1
0	12	1	1	8	1	5	1	5	8	2	5	0	10	15	2	2	2	2	1	0	1	1	2	2	2	0	1	2	0	2	2	0	0	2	1	0	0	2	2
0	12	1	1	8	1	9	1	10	8	5	5	2	7	20	1	2	1	1	1	0	1	2	2	0	2	1	2	1	1	2	2	1	1	1	1	1	0	1	1
1	12	1	0	1	0	0	0	0	3	4	3	3	9	13	2	1	1	2	1	1	1	0	2	0	2	0	0	1	1	2	2	2	1	1	1	0	0	0	2
0	12	1	1	5	0	0	1	3	5	0	3	1	9	9	1	1	1	2	0	0	2	1	2	0	2	0	1	1	1	2	2	0	0	2	1	0	0	0	2
1	12	1	1	4	0	2	0	2	2	1	4	2	6	9	2	2	0	1	0	0	1	0	0	1	2	0	0	2	1	1	2	0	0	1	2	0	2	1	2
0	12	1	1	8	1	9	1	5	1	2	2	2	9	7	2	0	0	1	1	0	1	0	2	2	0	0	0	2	0	1	2	0	0	2	2	0	0	0	2
0	12	1	1	9	0	0	1	9	2	4	6	3	10	15	2	1	1	2	1	0	1	0	2	2	2	0	1	1	2	0	2	2	2	2	2	0	0	0	1
1	12	1	0	3	0	10	1	10	6	1	3	1	10	11	2	2	1	2	1	0	2	2	2	1	2	0	0	1	0	2	2	0	0	2	2	0	0	1	2
1	11	1	1	7	1	9	1	10	2	3	3	2	8	10	1	2	1	2	0	0	1	1	2	0	2	1	0	2	0	0	2	1	0	1	2	0	2	0	1
1	11	1	0	5	1	10	1	10	4	0	6	0	10	10	2	2	2	2	0	0	2	2	2	0	2	0	0	2	2	0	2	0	0	2	1	0	0	0	1
1	12	1	0	3	0	0	1	5	4	2	6	0	9	12	2	2	1	1	0	0	1	1	2	1	2	0	0	2	2	1	2	1	0	2	1	0	0	1	2
1	12	1	0	3	0	2	1	10	9	2	5	2	9	18	2	1	2	2	2	0	2	2	2	1	2	0	1	2	1	2	2	0	0	1	1	0	2	2	1
0	13	1	0	0	0	0	1	2	7	3	2	4	9	16	2	0	0	1	2	1	1	2	2	1	2	0	2	1	1	2	2	0	1	2	2	0	1	1	2
1	11	1	1	6	1	7	0	0	3	1	2	0	8	6	2	1	1	1	0	0	1	2	2	0	2	0	0	2	0	0	2	0	0	1	2	0	0	0	1
1	11	1	1	4	0	2	1	3	1	2	5	0	5	8	1	0	0	1	0	0	0	0	0	0	2	0	0	2	1	0	2	0	0	1	0	0	0	1	0
0	11	1	0	1	0	0	0	0	3	0	2	3	8	8	2	1	0	2	0	1	2	2	2	1	2	0	0	1	0	0	1	0	0	1	2	0	1	1	2
1	11	1	1	4	0	2	0	0	2	1	3	1	9	7	2	1	0	1	0	0	1	1	2	0	2	0	0	2	0	1	2	0	1	2	1	0	0	0	1
1	11	1	0	3	0	0	0	0	0	1	3	0	7	4	2	1	0	1	0	0	1	0	1	0	2	0	0	2	0	0	2	0	0	1	1	0	0	0	1
1	11	1	0	10	0	10	0	10	9	3	5	6	5	23	1	1	2	2	2	2	1	2	1	2	2	0	2	0	0	2	1	0	0	0	1	0	2	1	1
1	11	1	1	7	0	0	1	10	2	2	6	2	7	12	2	2	0	2	1	1	1	2	1	0	2	0	0	1	2	0	2	0	0	0	1	0	0	0	1
0	10	1	1	5	0	0	1	1	9	2	8	5	8	24	2	2	2	2	0	1	1	2	2	2	2	0	1	0	2	2	0	1	0	2	1	0	2	2	1
0	11	1	0	0	0	0	1	2	2	0	0	0	10	2	2	0	1	2	0	0	2	0	2	0	2	0	1	2	0	0	2	0	0	2	2	0	0	0	2
1	11	1	1	7	0	0	1	8	0	0	1	2	10	3	2	0	0	2	0	0	2	0	2	0	2	0	0	2	0	0	2	0	0	2	2	0	2	0	1
1	11	1	0	2	0	0	0	0	3	0	0	0	10	3	2	0	0	2	0	0	2	1	2	0	2	0	2	2	0	0	2	0	0	2	2	0	0	0	2
0	11	1	0	2	0	1	1	2	3	2	3	0	10	8	2	0	0	2	1	0	1	1	2	1	2	0	1	2	0	0	2	0	0	2	1	0	0	1	1
1	11	1	0	2	0	0	1	1	6	6	3	3	7	18	2	0	0	1	2	0	0	2	1	0	2	2	2	2	1	0	2	0	1	1	1	0	2	2	1
1	11	1	1	8	1	10	1	7	0	3	4	4	7	11	1	1	0	1	0	0	1	0	2	0	2	1	0	1	1	0	2	1	2	1	1	0	1	0	1
0	12	1	1	10	1	10	0	0	8	3	3	3	10	17	2	0	0	2	2	0	1	2	2	2	2	0	2	2	1	2	2	0	1	2	2	0	2	2	2
1	11	1	0	1	0	0	0	0	4	4	5	5	5	18	1	1	1	1	2	2	1	1	1	1	1	1	0	1	1	1	1	0	0	1	1	0	1	1	1
0	12	1	1	4	1	4	1	4	5	2	3	5	6	15	2	1	2	1	1	0	2	1	1	0	2	0	0	1	0	1	1	0	2	1	1	1	2	1	1
0	12	1	1	7	1	5	1	8	4	3	3	2	9	12	2	0	1	1	1	0	1	1	2	0	2	0	1	2	1	1	2	1	2	2	1	0	0	0	1
0	12	1	1	4	1	8	1	2	8	4	7	1	8	20	1	2	2	1	0	0	1	2	2	1	2	0	1	2	1	1	2	1	0	2	0	2	1	2	1
1	11	1	1	6	0	0	1	7	5	3	4	4	10	16	2	1	1	2	1	0	2	1	2	1	2	0	1	1	1	1	2	1	1	2	1	1	2	1	2
1	11	1	0	4	0	0	1	6	5	3	3	1	8	12	2	1	2	1	2	1	1	2	2	2	2	0	1	2	0	0	2	0	0	1	2	0	0	0	2
0	12	1	0	0	1	3	1	6	4	2	1	1	8	8	2	0	0	2	1	0	1	1	2	1	2	0	1	2	0	0	0	0	0	2	2	0	1	2	2
1	11	1	1	6	1	5	1	5	1	4	5	1	9	11	1	1	0	2	1	0	2	1	2	0	2	0	0	2	2	0	2	2	1	2	2	1	0	0	0
1	11	1	0	7	0	0	1	1	4	1	1	0	8	6	2	0	0	1	1	0	2	1	2	0	2	0	1	2	0	1	2	0	0	1	1	0	0	1	2
0	11	1	1	8	1	6	1	3	4	4	5	5	9	18	1	1	0	2	1	1	1	1	2	1	2	0	1	1	1	1	2	2	2	2	1	0	1	1	1
1	12	1	1	3	0	0	1	1	9	3	4	6	7	22	1	2	2	2	1	2	1	1	1	2	2	0	2	1	0	2	2	1	1	1	2	0	2	2	2
0	12	1	0	2	0	1	1	3	0	1	0	1	6	2	2	0	0	1	0	0	1	0	1	0	2	0	0	1	0	0	1	0	0	1	2	0	0	0	2
0	12	1	0	0	0	0	1	2	0	1	0	0	7	1	0	0	0	1	0	0	1	0	2	0	2	0	0	2	0	0	2	0	0	2	2	0	0	0	2
0	12	1	0	1	1	10	0	0	0	1	0	1	8	2	2	0	0	1	0	0	2	0	1	0	2	0	0	1	0	0	2	1	0	2	2	0	0	0	2
1	11	1	1	6	0	0	1	8	2	2	4	1	5	9	1	1	0	1	0	0	1	1	1	0	2	0	0	2	1	1	1	0	1	1	1	1	0	0	1
1	10	1	0	8	0	5	1	5	1	1	1	2	8	5	2	0	0	2	1	0	2	0	1	0	1	0	0	1	0	1	2	0	0	1	2	0	0	0	1
1	11	1	1	7	0	0	1	5	0	1	1	0	9	2	2	0	0	2	1	0	2	0	2	0	2	0	0	2	1	0	2	0	0	1	2	0	0	0	2
1	11	1	1	5	0	0	1	4	4	4	3	1	9	12	2	1	0	2	1	0	1	1	2	0	2	0	1	2	1	1	2	1	0	1	2	1	1	1	1
1	13	1	1	10	0	0	1	10	0	0	2	5	7	7	2	0	0	2	0	1	2	0	1	0	2	0	0	1	2	0	2	0	1	0	2	0	2	0	2
1	13	1	1	1	1	4	1	10	5	7	6	6	7	24	1	2	2	2	2	2	1	1	1	2	2	2	1	0	0	0	2	0	1	1	1	2	1	1	1
1	10	1	0	5	0	4	1	6	1	1	0	0	7	2	2	0	0	2	0	0	1	0	0	0	2	0	0	2	0	1	2	0	0	1	2	0	0	0	2
0	11	1	0	5	1	2	0	0	4	1	2	0	10	7	2	0	2	2	0	0	2	1	2	0	2	0	0	2	0	0	2	1	0	2	1	0	0	1	1
0	10	1	1	7	1	3	1	3	4	4	2	1	7	11	1	0	1	2	0	0	1	0	1	0	1	1	1	2	1	1	2	2	0	1	2	0	0	1	1
1	11	1	0	4	0	0	0	0	2	2	1	2	5	7	1	0	1	2	0	0	1	0	1	0	2	0	0	1	0	1	0	1	0	1	2	0	1	0	1
1	11	1	0	2	0	0	0	0	2	1	3	1	8	7	1	1	0	2	0	0	1	2	2	0	2	0	0	2	1	0	2	0	0	1	2	0	1	0	1
0	12	1	1	9	1	9	1	8	8	5	4	9	7	26	2	0	0	1	2	2	1	2	1	1	1	0	2	0	2	2	2	2	2	1	2	0	2	2	1
0	11	1	1	2	1	6	1	6	4	4	2	0	6	10	1	0	2	1	1	0	1	2	1	0	2	1	0	2	1	0	2	1	0	1	2	0	0	0	1
1	11	1	0	8	0	6	0	9	5	1	7	2	9	15	2	1	1	2	0	1	1	2	1	2	2	0	1	2	2	0	2	0	0	2	1	0	1	1	1
1	11	1	0	1	0	2	0	1	2	0	0	1	10	3	2	0	1	2	0	0	2	1	2	0	2	0	0	2	0	0	2	0	1	2	2	0	0	0	2
0	11	1	0	0	0	0	0	0	5	0	0	1	10	6	2	0	1	2	0	0	2	2	2	0	2	0	2	2	0	0	2	0	0	2	2	0	1	0	2
0	11	1	0	0	1	1	0	0	8	0	0	1	10	9	2	0	1	2	0	0	2	2	2	0	2	0	2	2	0	2	2	0	0	2	2	0	1	1	2
1	11	1	1	3	0	0	1	6	3	2	3	0	8	8	1	1	1	2	0	0	1	0	2	1	2	1	0	2	0	1	2	0	0	1	1	0	0	1	2
0	10	1	0	1	0	0	0	0	2	0	0	0	10	2	2	0	0	2	0	0	2	0	2	0	2	0	1	2	0	0	2	0	0	2	2	0	0	1	2
1	11	1	1	5	0	0	0	0	1	2	5	0	8	8	1	1	0	2	1	0	1	0	2	2	2	0	0	2	1	0	2	0	0	1	1	0	0	1	2
0	11	1	1	7	1	8	0	6	2	2	4	0	10	8	2	1	0	2	1	0	1	1	2	0	2	0	0	2	1	1	2	0	0	2	0	0	0	0	2
0	11	1	1	8	0	8	1	6	1	0	0	1	10	2	2	0	0	2	0	0	2	1	2	0	2	0	0	2	0	0	2	0	0	2	2	0	1	0	2
0	10	1	0	1	0	0	0	0	0	2	0	1	9	3	2	0	0	1	0	0	0	0	2	0	2	0	0	2	0	0	2	0	0	2	2	0	1	0	2
1	10	1	1	5	0	0	0	0	4	2	2	0	10	8	2	1	2	2	1	0	2	1	2	0	2	0	0	2	0	1	2	1	0	2	1	0	0	0	2
1	13	1	1	7	1	6	1	5	1	1	1	0	10	3	2	1	0	2	0	0	1	0	2	0	2	0	0	2	0	1	2	0	0	2	2	0	0	0	2
1	11	1	0	0	0	0	0	0	0	1	2	4	6	7	2	0	0	0	0	1	1	0	1	0	1	0	0	1	0	0	2	0	0	1	1	0	1	0	1
0	13	1	1	5	1	8	1	4	5	1	4	3	7	13	1	1	1	1	0	0	1	1	2	0	2	0	1	1	1	1	2	0	0	1	1	0	2	1	1
0	13	1	1	10	1	7	1	7	0	3	4	0	8	7	1	0	0	2	1	0	1	0	1	0	2	1	0	2	1	0	2	0	0	2	1	0	0	0	0
0	13	1	1	9	1	8	1	7	1	3	4	0	8	8	1	0	0	2	1	0	1	0	1	0	2	1	0	2	1	1	2	0	0	2	1	0	0	0	0
1	12	1	0	7	1	8	0	10	0	2	1	3	9	6	1	1	0	2	0	0	1	0	2	0	2	0	0	1	0	0	2	1	0	2	2	0	2	0	2
1	10	1	0	0	0	0	1	2	4	2	1	2	7	9	2	0	0	1	1	0	1	1	1	0	2	0	1	1	0	1	2	0	0	1	2	0	1	1	1
1	10	1	0	3	0	2	1	6	2	1	2	2	6	7	1	1	0	1	0	0	1	0	1	0	2	0	1	1	0	1	2	0	1	1	2	0	0	0	1
1	10	1	0	0	0	0	0	0	0	1	3	2	4	6	1	0	0	2	0	0	1	0	0	0	2	0	0	2	1	0	1	0	1	0	2	0	1	0	0
1	11	1	0	4	0	0	0	0	3	1	1	0	10	5	2	0	1	2	0	0	1	1	2	0	2	0	0	2	0	1	2	0	0	2	2	0	0	0	1
1	12	1	1	8	1	10	1	2	2	3	5	2	8	12	1	2	0	2	0	0	1	0	1	1	2	1	0	0	0	2	2	0	0	2	2	1	0	0	0
1	11	1	1	7	1	10	1	2	3	3	5	2	8	13	1	2	0	1	1	0	0	1	2	2	2	0	0	1	0	2	2	0	1	2	2	0	0	0	1
0	13	1	1	7	1	10	1	3	1	3	5	0	8	9	1	2	0	1	2	0	1	1	2	1	2	0	0	2	0	0	2	0	0	2	1	0	0	0	1
0	10	1	0	1	0	0	0	0	1	0	0	1	10	2	2	0	0	2	0	0	2	0	2	0	2	0	0	1	0	1	2	0	0	2	2	0	0	0	2
0	12	1	1	10	1	10	1	10	6	6	8	2	3	22	0	2	2	1	2	2	0	2	0	2	2	2	2	2	2	0	2	0	0	0	2	0	0	0	0
1	12	1	1	8	1	10	1	8	4	4	7	6	5	21	0	0	1	1	1	1	1	0	1	1	0	1	1	2	2	1	2	0	2	1	0	1	1	1	0
0	11	1	1	8	1	5	0	0	1	2	2	0	10	5	2	1	0	2	1	0	2	1	2	1	2	0	0	2	0	0	2	1	0	2	2	0	0	0	2
0	11	1	1	4	0	0	1	2	0	1	1	0	10	2	2	0	0	2	0	0	1	0	2	0	2	0	0	2	0	0	2	0	0	2	2	0	0	0	1
0	11	1	1	7	0	0	1	6	3	2	6	0	9	11	2	1	0	2	0	0	0	1	1	2	2	0	0	2	1	1	2	0	0	2	1	0	0	1	1
0	10	1	0	4	0	0	0	0	5	3	2	3	10	13	2	0	1	2	1	0	1	1	2	0	1	0	1	1	1	2	2	1	0	2	2	0	1	0	1
1	11	1	0	0	1	5	0	0	3	2	5	3	6	13	1	1	2	1	1	0	1	0	1	1	1	0	0	1	1	1	2	0	0	1	2	0	1	0	0
0	13	1	1	10	1	10	1	10	10	3	9	0	6	22	1	2	2	1	2	0	1	2	1	2	2	0	2	2	2	2	2	0	0	1	0	0	0	2	1
1	10	1	1	5	0	2	0	0	1	1	2	0	8	4	2	1	0	2	0	0	1	1	1	0	2	0	0	2	0	0	2	0	0	1	2	0	0	0	1
1	12	1	0	2	0	1	1	3	2	5	5	5	1	17	0	1	1	0	0	0	1	0	0	1	0	2	1	0	1	0	1	0	0	0	1	2	1	0	1
0	10	1	0	0	0	0	0	0	8	3	1	4	9	16	2	0	1	1	1	1	2	2	2	0	2	0	2	1	1	1	2	2	1	2	2	0	1	2	2
0	11	1	0	1	0	0	1	4	0	1	3	3	5	7	1	0	0	1	0	0	1	0	1	0	1	0	0	1	0	0	2	0	0	0	0	0	1	0	1
0	11	1	1	1	0	0	1	1	3	1	6	0	9	10	2	1	0	2	1	0	2	1	2	1	2	0	0	2	1	0	2	0	0	1	0	0	0	2	1
1	11	1	1	7	0	0	1	3	4	1	3	3	8	11	2	0	1	2	0	1	1	1	1	2	2	0	0	1	0	2	2	0	0	1	2	0	1	0	1
1	12	1	0	5	0	1	0	0	1	1	2	1	8	5	2	1	0	2	0	1	1	1	1	0	2	0	0	2	0	0	2	0	0	1	2	0	0	0	1
1	11	1	1	6	0	0	1	4	1	2	3	0	8	6	2	1	0	2	0	0	0	0	1	1	2	0	0	2	1	1	2	0	0	1	2	0	0	0	2
1	11	1	1	3	0	0	0	0	7	2	4	2	10	15	2	1	2	2	1	0	2	1	2	1	2	0	2	1	1	0	2	1	1	2	2	0	0	2	1
0	10	1	0	4	1	5	0	0	3	2	2	2	9	9	2	0	0	1	1	0	2	1	2	0	2	0	1	1	0	0	2	1	1	2	1	0	0	1	1
1	11	1	0	3	1	8	1	10	4	4	5	1	7	14	2	1	0	1	2	0	1	1	2	1	2	0	0	2	1	1	1	1	0	1	1	0	1	2	1
1	11	1	1	6	0	0	0	0	1	2	5	0	7	8	2	2	0	1	0	0	1	0	1	0	2	0	0	2	1	1	2	1	0	1	1	0	0	0	1
1	11	1	1	4	0	0	0	0	3	1	1	1	6	6	1	0	0	2	0	0	2	1	1	0	2	0	0	1	0	1	2	0	0	0	1	1	0	1	2
0	13	1	1	6	0	0	0	0	3	1	2	1	9	7	2	0	0	1	0	0	1	1	2	0	2	0	0	1	0	1	2	0	0	2	1	0	0	1	1
1	11	1	0	1	0	0	0	0	1	0	1	2	8	4	2	0	0	1	0	0	2	1	1	0	1	0	0	2	0	0	2	0	1	2	2	0	0	0	1
1	13	1	0	0	1	0	1	10	5	5	5	5	5	20	1	1	1	1	1	1	1	1	1	1	1	1	1	1	1	1	1	1	1	1	1	1	1	1	1
0	13	1	1	6	1	5	0	0	1	3	2	0	10	6	2	1	0	2	2	0	1	0	2	0	2	0	0	2	0	0	2	0	0	2	2	0	0	1	1
0	13	1	1	6	1	7	1	10	7	2	3	5	10	17	2	1	2	2	1	1	1	2	2	2	2	0	1	1	0	1	2	0	2	2	2	0	1	1	2
1	14	1	1	10	1	10	1	8	2	2	5	3	4	12	1	1	1	1	1	1	1	1	1	1	2	0	0	1	0	0	0	0	0	1	1	0	1	0	0
0	13	1	0	0	0	0	1	1	3	1	1	2	6	7	1	0	2	1	0	0	1	0	1	0	2	0	0	1	0	0	2	0	0	1	2	0	1	1	1
1	14	1	0	3	0	0	1	2	1	1	7	4	6	13	1	2	0	1	0	0	1	0	1	1	1	0	0	1	1	0	2	0	1	1	1	0	1	1	0
1	13	1	0	0	0	0	0	0	0	1	3	0	8	4	0	0	0	2	0	0	1	0	2	0	2	0	0	2	1	0	2	0	0	2	1	0	0	0	1
1	14	1	1	10	1	10	1	7	4	1	3	0	9	8	2	1	1	1	1	0	2	1	2	2	2	0	0	2	0	1	2	0	0	2	2	0	0	1	2
1	13	1	0	7	0	7	1	8	1	1	3	0	7	5	2	1	0	1	0	0	1	1	1	0	2	0	0	2	1	0	2	0	0	1	2	0	0	0	1
1	13	1	1	8	1	6	1	3	0	1	2	0	7	3	1	1	0	1	0	0	1	0	2	0	2	0	0	2	0	0	2	0	0	1	2	0	0	0	1
0	12	1	1	7	1	9	1	4	0	2	4	0	7	6	2	0	0	2	1	0	1	0	1	0	2	0	0	2	1	0	2	0	0	0	0	0	0	0	1
0	10	1	1	6	1	3	1	3	3	0	3	0	10	6	2	1	1	2	0	0	2	1	2	0	2	0	0	2	0	1	2	0	0	2	1	0	0	0	1
1	11	1	0	4	0	0	0	1	2	1	4	2	8	9	1	1	0	2	0	0	1	1	2	1	2	0	0	1	1	1	2	0	0	1	1	0	1	0	2
1	10	1	1	7	0	0	0	0	2	5	7	4	4	18	1	1	0	0	2	0	0	2	1	1	0	0	0	1	2	0	2	1	0	0	1	0	1	0	0
1	11	1	0	3	0	0	1	2	0	0	0	0	10	0	2	0	0	2	0	0	2	0	2	0	2	0	0	2	0	0	2	0	0	2	2	0	0	0	2
1	13	1	1	5	1	5	1	1	2	2	2	2	10	8	2	0	0	2	1	0	1	1	2	0	2	0	1	1	0	0	2	0	1	2	1	0	0	0	1
1	10	1	1	7	0	0	0	0	2	0	1	1	8	4	2	1	0	1	0	0	2	0	1	0	2	0	1	2	0	1	2	0	0	2	2	0	1	0	2
0	11	1	1	4	0	0	1	5	2	1	2	0	9	5	2	0	1	2	0	0	1	1	2	0	2	0	0	2	0	0	2	0	0	1	1	0	0	0	1
0	11	1	0	4	0	0	1	2	2	0	0	2	10	4	2	0	2	2	0	1	2	0	2	0	2	0	0	1	0	0	2	0	0	2	2	0	0	0	2
1	15	1	1	7	1	5	1	10	1	3	4	1	10	9	2	2	0	2	0	0	0	0	2	0	2	0	0	2	1	1	2	1	0	2	1	0	1	0	2
0	15	1	1	7	1	6	1	10	4	2	6	2	8	14	2	2	1	2	1	0	1	2	1	1	1	0	0	2	1	1	2	0	0	1	1	0	1	0	1
1	10	1	0	1	0	0	0	0	3	0	2	2	9	7	2	1	0	1	0	0	2	1	2	0	2	0	1	1	0	0	2	0	1	2	2	0	0	1	1
1	10	1	1	7	0	0	1	3	2	1	4	0	9	7	2	1	1	2	0	0	1	1	2	1	2	0	0	2	1	0	2	0	0	1	2	0	0	0	1
1	10	1	1	7	1	5	0	0	4	3	6	3	7	16	1	1	1	0	1	1	1	2	2	2	1	0	0	1	1	1	2	0	0	2	1	1	0	0	1
1	11	1	0	1	0	0	1	1	6	2	2	1	10	11	2	1	1	2	1	0	2	2	2	1	2	1	1	2	0	1	2	0	0	2	2	0	1	1	2
1	11	1	1	5	0	1	0	0	2	3	6	1	8	12	2	2	0	1	0	0	1	1	1	1	1	0	0	2	1	1	2	1	0	2	1	1	0	0	1
1	13	1	0	2	1	3	1	2	0	3	4	2	5	9	1	1	0	1	1	1	0	0	1	0	2	0	0	1	1	0	2	0	0	0	1	0	0	0	1
0	13	1	0	0	1	5	1	5	1	3	5	1	9	10	2	1	0	2	1	1	1	1	2	1	2	1	0	2	1	0	2	0	0	1	1	0	0	0	1
1	11	1	1	4	0	0	0	0	0	1	1	0	10	2	2	0	0	2	0	0	2	0	2	0	2	0	0	2	0	0	2	0	0	2	1	1	0	0	2
0	13	1	0	4	1	4	1	4	9	8	5	6	10	28	2	1	1	2	2	2	2	2	2	2	2	2	2	2	2	2	2	2	2	2	2	2	2	2	2
0	13	1	1	7	1	3	1	5	5	2	6	4	5	17	1	0	2	1	1	2	1	0	1	1	2	0	1	1	2	2	1	0	1	1	1	0	0	0	0
1	12	1	1	2	1	7	1	5	4	2	4	6	9	16	2	1	1	1	1	2	1	2	2	0	1	0	0	1	1	1	2	0	0	2	1	0	2	0	1
1	13	1	1	8	1	7	1	6	4	4	7	2	5	17	1	2	1	0	1	0	1	2	1	2	2	1	0	1	2	1	2	0	0	1	2	1	1	0	1
0	13	1	1	8	1	8	1	5	5	3	5	1	5	14	1	2	1	0	2	0	1	2	1	1	1	0	1	2	0	1	2	0	0	1	1	0	0	0	1
1	13	1	1	7	1	5	1	3	1	4	9	2	5	16	1	2	0	1	1	0	1	1	1	2	1	0	0	1	2	0	1	0	0	1	1	2	0	0	0
0	12	1	1	7	1	9	1	10	3	6	3	2	7	14	1	0	2	2	2	0	0	0	1	0	2	1	0	2	2	1	2	0	0	1	2	1	2	0	1
1	13	1	0	7	1	5	0	3	2	1	4	1	7	8	1	1	1	1	0	0	1	0	2	1	1	0	0	2	0	1	2	0	0	1	1	0	0	0	1
1	11	1	0	5	0	1	1	4	2	0	2	2	10	6	2	0	0	2	0	1	2	1	2	0	2	0	0	2	1	0	2	0	0	2	1	0	1	1	2
1	13	1	1	6	1	10	1	7	3	5	5	3	5	16	1	0	1	1	1	0	0	1	1	1	1	1	0	1	1	0	1	0	0	1	1	1	1	1	0
1	13	1	1	6	0	2	1	5	3	2	4	2	9	11	2	1	0	1	1	1	1	1	2	1	2	0	0	1	0	2	2	0	0	2	1	0	0	0	1
1	13	1	0	1	0	0	1	4	1	0	0	4	10	5	2	0	0	2	0	1	2	1	2	0	0	0	0	2	0	0	2	0	0	2	2	0	1	0	2
0	11	1	0	0	0	0	1	4	2	1	5	0	8	8	1	1	0	2	1	0	2	1	1	1	2	0	0	2	1	1	2	0	0	2	1	0	0	0	1
1	13	1	1	10	1	10	1	10	0	4	8	1	6	13	1	2	0	2	0	0	0	0	1	0	2	0	0	2	2	0	2	0	0	0	0	2	1	0	0
0	12	1	1	5	1	7	1	8	6	3	1	1	10	11	2	0	1	2	1	0	1	2	2	0	2	0	1	2	0	1	2	1	1	2	1	0	0	1	2
1	12	1	1	9	1	10	1	10	3	1	6	1	9	11	2	2	0	2	0	0	2	0	1	1	2	0	1	1	1	2	2	1	0	2	1	0	0	0	1
1	12	1	1	10	0	0	0	0	1	1	5	3	7	10	1	2	0	1	0	2	2	1	2	0	2	0	0	1	2	0	2	0	0	1	1	1	0	0	2
1	13	1	1	3	0	0	0	0	1	3	5	1	6	10	2	1	0	1	1	0	0	0	1	1	2	0	0	2	0	0	2	0	1	0	0	0	0	1	1
0	13	1	1	5	0	0	0	0	0	0	0	1	7	1	2	0	0	1	0	0	2	0	2	0	2	0	0	2	0	0	1	0	0	1	2	0	1	0	2
1	12	1	1	10	1	6	0	1	0	8	9	2	0	19	0	2	0	0	1	0	0	0	0	2	1	2	0	2	1	0	0	1	0	0	0	2	1	0	0
1	12	1	1	10	1	6	0	1	0	8	9	2	0	19	0	2	0	0	1	0	0	0	0	2	1	2	0	2	1	0	0	1	0	0	0	2	1	0	0
0	13	1	1	8	1	2	1	6	3	3	4	3	8	13	1	1	0	2	1	0	0	1	2	1	1	0	0	2	2	2	2	0	0	1	2	0	2	0	2
1	13	1	1	8	0	0	0	0	0	3	6	0	7	9	1	1	0	2	0	0	1	0	0	0	2	0	0	2	2	0	2	0	0	2	1	2	0	0	0
0	13	1	0	1	1	1	1	1	5	1	3	2	8	11	2	0	1	1	0	1	1	1	2	1	2	0	1	1	1	1	1	0	0	2	1	0	0	1	2
1	12	1	1	2	0	0	1	0	1	3	4	1	7	9	2	1	0	0	1	0	1	0	2	1	2	1	0	1	1	1	2	0	0	1	2	0	0	0	1
1	14	1	1	5	0	5	1	5	2	2	6	1	8	11	2	1	0	2	0	0	0	0	1	0	2	0	0	2	2	2	2	0	1	1	1	0	0	0	0
0	12	1	1	5	1	3	1	7	2	1	3	0	7	6	2	1	0	2	0	0	1	1	1	1	2	0	0	2	0	0	2	0	0	0	1	0	0	1	2
0	11	1	1	3	0	0	1	4	4	1	1	0	8	6	2	0	1	1	0	0	1	1	2	0	2	0	0	2	0	1	2	0	0	1	2	0	0	1	1
0	11	1	1	4	1	6	1	4	2	1	1	0	7	4	1	0	0	1	0	0	1	1	1	0	2	0	0	2	0	0	2	0	0	2	1	0	0	1	2
1	13	1	1	8	1	10	1	5	3	6	4	0	5	13	1	2	0	0	0	0	1	2	2	0	2	1	1	2	0	0	1	2	0	1	0	2	0	0	2
0	12	1	1	4	0	0	1	5	7	1	5	3	10	16	2	2	1	2	1	1	2	2	2	1	1	0	1	1	0	1	2	0	0	2	1	0	0	2	1
0	11	1	1	3	0	0	1	5	8	1	4	2	10	15	2	2	0	2	1	2	2	2	2	1	2	0	2	2	0	2	2	0	0	2	2	0	0	2	1
0	12	1	1	0	0	0	1	2	2	0	1	0	10	3	2	1	0	2	0	0	2	0	2	0	2	0	1	2	0	0	2	0	0	2	2	0	0	1	2
0	12	1	0	1	0	0	1	0	0	0	1	0	10	1	2	0	0	2	0	0	2	0	2	0	2	0	0	2	1	0	2	0	0	2	2	0	0	0	2
0	13	1	1	3	1	2	1	2	4	3	4	4	10	15	2	1	2	2	2	1	1	1	2	1	2	0	1	1	1	0	2	0	0	2	2	0	2	0	1
1	12	1	0	0	0	0	0	0	2	2	1	0	8	5	2	0	1	0	1	0	2	1	2	1	2	0	0	2	0	0	2	1	0	2	2	0	0	0	2
0	12	1	0	0	0	0	0	0	0	1	0	3	10	4	2	0	0	2	0	2	1	0	2	0	2	0	0	1	0	0	2	0	0	2	2	0	0	0	2
1	12	1	1	10	1	7	1	8	6	6	6	0	8	18	0	2	2	2	1	0	1	2	2	2	2	2	2	2	0	0	2	2	0	2	2	0	0	0	0
1	12	1	1	10	1	7	1	5	2	4	4	3	8	13	2	1	0	1	1	2	1	1	2	0	2	0	0	2	1	0	2	1	0	1	1	1	1	1	1
1	13	1	1	1	0	0	1	10	2	2	2	2	7	8	2	1	1	1	1	0	1	0	1	0	2	0	0	1	0	1	2	0	0	1	2	0	1	0	1
1	12	1	0	0	0	0	0	0	6	4	6	2	6	18	2	2	2	0	0	2	2	2	2	2	2	2	2	2	2	0	0	2	0	2	2	0	0	0	2
1	11	1	1	1	1	1	1	1	0	2	4	0	7	6	2	2	0	1	0	0	1	0	2	0	2	1	0	2	1	0	2	0	0	0	2	0	0	0	1
1	11	1	0	0	0	0	0	0	6	4	3	5	5	18	2	1	1	1	2	0	1	2	0	0	2	0	1	1	1	2	1	1	2	1	1	0	2	0	2
1	12	1	1	6	0	0	0	0	1	2	4	0	5	7	1	0	0	1	1	0	1	0	1	1	2	0	0	2	1	1	1	0	0	1	1	0	0	0	1
0	10	1	1	4	0	0	0	0	8	4	3	7	8	22	2	1	2	1	1	2	2	2	1	1	0	1	2	1	0	1	2	0	0	2	1	2	2	1	2
0	12	1	0	0	0	0	1	10	7	0	4	2	9	13	2	1	1	1	0	1	2	1	2	2	2	0	2	2	0	2	2	0	1	2	1	0	0	1	2
0	12	1	1	10	1	10	1	9	4	5	6	3	6	18	1	2	0	1	2	0	1	1	1	0	2	1	1	2	2	1	2	1	1	1	1	0	2	1	1
1	12	1	1	7	1	9	1	6	5	2	6	3	8	16	2	2	2	1	0	1	1	1	2	1	2	1	1	1	2	1	2	0	1	1	2	0	0	0	1
0	12	1	1	6	0	3	0	1	9	5	2	2	8	18	1	1	2	1	2	1	1	2	2	1	2	1	2	2	0	1	2	1	0	2	2	0	1	2	2
1	10	1	0	2	0	0	1	1	2	1	1	4	9	8	2	0	0	1	0	0	1	0	2	0	1	0	0	1	0	2	2	0	1	2	1	0	1	0	2
0	12	1	0	0	0	0	0	0	2	0	0	0	9	2	2	0	1	2	0	0	2	0	2	0	2	0	1	2	0	0	2	0	0	1	2	0	0	0	2
0	11	1	1	3	1	3	1	2	3	1	3	1	7	8	2	1	0	1	0	0	1	2	1	0	2	0	0	1	0	1	2	0	0	1	1	0	0	0	1
1	12	1	1	3	1	7	1	8	2	3	2	1	8	8	2	0	1	1	1	0	1	0	2	1	2	0	1	1	0	0	2	0	0	1	2	1	0	0	1
0	12	1	1	9	1	9	1	4	4	3	5	0	7	12	2	1	1	1	1	0	1	1	1	1	2	1	1	2	1	0	2	0	0	1	1	0	0	1	1
1	12	1	0	3	0	0	0	0	0	1	2	2	8	5	2	1	0	1	0	0	1	0	2	0	2	0	0	1	0	0	2	0	0	1	2	0	1	0	1
0	13	1	1	10	1	5	1	2	4	4	2	1	7	11	1	0	1	2	1	0	0	1	2	1	2	0	1	2	0	1	2	1	0	0	1	0	1	0	2
1	10	1	0	6	0	0	0	0	0	1	1	0	7	2	1	0	0	1	0	0	1	0	2	0	2	0	0	2	0	0	2	0	0	1	2	0	0	0	1
0	11	1	0	5	0	1	1	2	2	1	3	0	10	6	2	0	1	2	0	0	1	0	2	1	2	0	0	2	0	0	2	0	0	2	0	0	0	1	2
1	12	1	0	0	0	0	0	0	1	1	2	2	9	6	2	1	0	2	0	0	1	0	1	0	2	0	0	1	1	1	2	0	0	2	2	0	1	0	2
0	13	1	1	4	1	5	1	7	5	1	2	3	6	11	2	0	0	1	1	1	2	2	1	1	2	0	0	1	0	2	2	0	0	0	2	0	1	1	1
0	10	1	1	1	0	0	1	3	3	2	2	3	8	10	2	0	1	2	1	1	1	0	1	0	2	0	1	1	0	1	2	0	0	1	1	0	1	0	1
0	13	1	1	2	1	1	1	3	4	2	4	3	5	13	1	2	0	1	1	0	1	1	1	0	1	0	1	1	1	1	1	0	0	1	2	0	1	1	1
0	11	1	1	9	0	0	0	0	4	3	3	0	7	10	1	0	0	1	1	0	1	2	2	0	2	0	1	2	0	0	2	1	0	1	0	0	0	1	1
0	10	1	1	7	0	0	0	0	6	3	2	2	5	13	1	0	2	1	1	0	1	1	1	0	2	1	1	2	0	1	1	0	0	1	1	0	2	1	1
1	13	1	1	10	1	10	1	10	2	5	5	4	9	16	1	2	0	2	2	2	1	2	2	2	2	1	0	2	1	0	2	1	0	2	2	0	2	0	2
1	13	1	1	7	0	0	1	10	6	4	3	1	9	14	1	0	2	2	1	0	1	2	2	0	2	1	0	2	1	1	2	1	0	2	1	0	1	1	1
1	11	1	0	0	0	0	0	0	1	0	2	0	10	3	2	1	0	2	0	0	2	0	2	1	2	0	0	2	0	1	2	0	0	2	2	0	0	0	2
1	12	1	0	0	0	0	0	0	0	1	2	3	8	6	1	0	0	1	0	0	1	0	2	0	2	0	0	0	0	0	2	0	0	2	1	0	1	0	1
1	11	1	0	5	0	3	0	0	1	1	2	0	6	4	1	0	0	1	0	0	1	0	1	0	2	0	1	2	0	0	2	0	0	1	1	0	0	0	1
1	10	1	1	2	0	0	0	0	0	1	2	0	8	3	2	0	0	1	0	0	1	0	2	0	2	0	0	2	0	0	2	0	0	1	1	0	0	0	1
1	11	1	1	5	0	0	0	0	0	1	1	0	8	2	2	0	0	1	0	0	1	0	2	0	2	0	0	2	0	0	2	0	0	1	1	0	0	0	2
0	11	1	1	2	1	1	1	3	4	4	5	2	10	15	2	1	1	2	1	0	1	0	2	1	2	0	1	1	1	1	2	1	1	2	1	1	0	1	1
0	10	1	0	2	0	0	0	0	2	2	2	1	9	7	2	0	0	2	1	1	1	1	1	0	2	0	0	2	1	1	2	0	0	2	2	0	0	0	1
1	10	1	1	7	0	0	1	8	4	1	3	2	9	10	1	0	0	2	0	1	1	1	2	0	2	0	1	2	1	1	2	0	1	2	1	0	0	1	1
0	11	1	1	5	0	0	0	2	4	2	1	0	6	7	1	0	1	1	1	0	1	2	1	0	2	0	0	2	0	1	2	0	0	1	1	0	0	0	2
1	11	1	0	2	0	0	1	4	3	2	3	0	9	8	2	0	1	2	1	0	1	1	2	1	2	0	0	2	0	0	2	0	0	1	1	0	0	1	1
0	10	1	1	6	0	0	0	0	2	1	3	1	8	7	2	0	0	1	0	1	1	0	1	0	2	0	1	2	1	0	2	0	0	2	1	0	0	1	1
1	11	1	1	6	1	4	0	0	2	3	5	1	8	11	2	2	0	1	1	0	1	0	2	0	2	1	0	1	1	1	2	0	0	1	0	0	0	1	2
1	10	1	1	8	1	6	0	0	1	1	1	0	6	3	1	0	0	1	0	0	1	0	2	0	2	0	1	2	0	0	1	0	0	1	1	0	0	0	2
1	11	1	1	4	0	0	1	1	3	2	5	3	9	13	2	0	1	2	0	0	2	1	2	2	2	0	0	1	1	1	2	2	2	1	1	0	0	0	1
1	11	1	1	4	0	0	0	0	5	1	2	1	10	9	2	0	2	2	1	0	2	1	2	0	2	0	0	2	1	1	2	0	1	2	1	0	0	1	2
0	11	1	1	3	1	5	0	0	1	1	2	3	9	7	2	0	1	2	0	1	1	0	2	0	2	0	0	1	1	0	2	0	0	1	1	0	1	0	2
1	11	1	0	4	1	8	1	7	3	0	1	0	10	4	2	1	1	2	0	0	2	2	2	0	2	0	0	2	0	0	2	0	0	2	2	0	0	0	2
1	11	1	1	5	0	0	1	3	4	4	3	2	9	13	2	1	2	2	0	0	0	2	1	0	2	1	0	1	0	0	2	1	1	2	1	0	0	0	1
1	11	1	0	7	0	7	1	6	1	1	4	0	6	6	1	2	1	2	0	0	1	0	1	0	2	0	0	2	0	0	1	0	0	1	1	0	0	0	1
1	10	1	0	6	1	5	1	4	3	2	3	1	6	9	1	0	0	1	0	0	1	1	1	0	1	0	1	2	1	1	2	0	0	1	1	1	0	0	1
1	11	1	1	10	1	8	1	8	5	2	9	2	6	18	2	2	1	1	1	0	1	2	1	1	2	0	0	1	2	1	2	0	1	0	0	0	0	1	0
1	11	1	1	4	0	0	1	5	2	2	1	2	6	7	1	0	0	2	1	0	1	1	1	0	2	0	0	1	0	0	1	0	0	1	1	0	1	1	2
0	11	1	1	5	0	0	0	0	1	0	0	0	10	1	2	0	0	2	0	0	2	0	2	0	2	0	0	2	0	0	2	0	0	2	2	0	0	1	2
1	11	1	0	0	0	0	0	0	5	1	5	0	9	11	1	2	0	2	1	0	2	2	2	0	2	0	0	2	1	2	2	0	0	2	0	0	0	1	2
1	11	1	0	7	0	7	1	6	1	1	4	2	6	8	1	2	1	1	0	0	1	0	1	0	1	0	0	1	0	0	2	0	0	1	1	0	0	0	1
1	11	1	1	6	0	5	1	4	2	2	3	1	6	8	0	0	0	2	0	0	0	0	1	0	2	0	1	2	1	1	2	0	0	1	1	0	1	0	1
0	11	1	1	8	1	10	1	5	0	3	6	1	5	10	1	1	0	1	0	0	0	0	1	0	2	0	0	1	1	0	2	1	0	0	0	0	0	0	0
1	11	1	0	0	0	0	0	0	6	7	7	5	4	25	1	2	2	0	1	1	0	2	1	1	2	2	1	0	0	0	2	2	2	0	0	0	0	1	0
0	11	1	1	7	0	5	0	2	2	2	3	3	7	10	1	1	0	2	1	0	1	1	1	0	1	0	0	2	0	0	2	0	1	1	1	0	1	1	1
0	11	1	1	7	1	9	1	4	8	5	4	5	7	22	2	2	1	1	2	1	1	2	1	0	2	1	2	1	1	2	2	1	2	1	2	0	1	1	1
0	10	1	1	6	1	2	0	0	4	2	1	0	10	7	2	0	0	2	2	0	2	1	2	1	2	0	1	2	0	1	2	0	0	2	2	0	0	1	2
0	11	1	1	9	1	7	1	6	2	2	4	2	9	10	2	1	1	2	1	0	1	1	2	0	2	0	0	2	1	0	1	0	0	2	1	0	2	0	1
1	10	1	1	5	1	3	1	4	1	0	1	2	4	4	0	1	0	0	0	0	2	0	2	0	2	0	0	1	0	1	0	0	1	2	2	0	0	0	2
0	13	1	1	6	1	7	1	7	6	2	6	6	7	20	1	1	1	1	1	2	2	2	2	1	1	1	2	1	1	0	2	0	1	1	0	0	1	1	1
0	11	1	1	4	0	0	0	0	1	3	5	3	1	12	0	0	0	0	0	0	1	0	0	0	2	2	1	0	2	0	0	0	0	1	1	0	1	0	0
1	12	1	0	5	0	2	0	0	0	3	6	1	4	10	0	1	0	2	0	0	0	0	1	1	2	1	0	2	2	0	0	0	0	1	1	0	1	0	1
0	13	1	1	5	1	4	0	0	5	2	3	1	10	11	2	0	0	2	1	0	1	2	2	0	2	0	1	2	1	1	2	0	1	2	1	0	0	1	1
0	12	1	1	10	1	7	1	10	4	3	6	0	7	13	1	2	0	2	2	0	1	0	2	2	2	0	2	2	1	0	2	0	0	0	2	0	0	2	1
1	13	1	1	5	1	3	1	1	4	2	2	3	6	11	1	0	0	1	1	1	1	2	1	0	2	0	0	1	0	2	2	0	0	1	1	0	1	0	1
0	12	1	1	3	1	10	1	6	8	5	6	3	9	22	2	2	1	2	2	0	1	2	2	1	2	0	2	2	1	2	2	2	2	1	1	0	1	1	1
1	11	1	1	4	1	2	1	1	0	2	4	0	8	6	2	1	0	1	1	0	1	0	2	0	2	0	0	2	1	0	2	0	0	1	1	0	0	0	1
0	12	1	1	4	0	0	0	0	5	3	2	1	9	11	2	1	1	2	1	1	1	1	2	1	2	0	1	2	0	1	2	1	0	1	2	0	0	1	2
0	12	1	1	9	1	8	1	6	4	2	5	3	8	14	2	1	0	1	1	0	1	2	2	1	1	0	1	1	1	0	2	0	0	1	1	0	1	1	1
1	12	1	1	10	0	0	0	0	1	1	4	2	8	8	1	1	1	2	0	0	1	0	2	0	2	0	0	2	1	0	2	0	1	1	1	0	1	0	1
1	12	1	1	5	0	2	0	0	1	2	1	0	8	4	2	1	0	1	0	0	0	0	1	0	2	0	0	2	0	1	2	0	0	2	2	0	0	0	2
1	12	1	1	8	1	5	1	3	0	2	5	3	3	10	0	1	0	1	0	0	0	0	0	1	1	0	0	1	0	0	1	0	0	1	1	0	1	0	0
1	12	1	1	8	1	8	1	2	1	1	5	0	6	7	1	2	0	1	0	0	1	0	1	1	2	0	0	2	1	1	2	0	0	1	1	0	0	0	2
0	12	1	1	3	1	3	1	4	9	5	5	9	9	28	2	2	2	2	2	2	1	2	1	1	1	1	2	0	1	1	2	1	2	2	2	0	2	2	1
0	10	1	1	5	1	4	1	2	1	2	0	0	9	3	2	0	0	1	1	0	2	1	2	0	2	0	0	2	0	0	2	1	0	2	2	0	0	0	2
0	10	1	1	6	1	4	1	3	4	4	6	3	9	17	2	1	0	2	1	1	1	1	2	1	2	1	1	1	2	1	2	1	1	1	1	0	0	1	1
0	11	1	1	6	0	5	1	3	5	2	4	0	5	11	1	2	1	1	1	0	1	2	1	0	2	0	1	2	1	1	1	0	0	1	2	0	0	0	1
0	11	1	1	5	1	7	1	8	1	1	4	2	9	8	2	1	0	1	0	0	1	0	2	1	2	0	0	1	0	1	2	0	1	2	1	0	0	0	1
0	11	1	1	7	1	8	1	9	5	3	6	1	10	15	2	2	1	2	1	0	1	2	2	0	2	0	1	2	2	1	2	1	0	2	0	0	1	0	2
1	11	1	1	10	1	10	1	10	1	0	1	0	9	2	2	1	1	2	0	0	2	0	1	0	2	0	0	2	0	0	2	0	0	2	2	0	0	0	2
1	10	1	1	10	1	8	1	9	1	2	3	2	8	8	2	2	0	2	0	0	1	0	2	0	2	0	0	1	1	1	2	1	0	0	2	0	1	0	2
0	11	1	1	4	0	0	1	2	4	1	0	0	8	5	2	0	1	2	0	0	1	1	1	0	2	0	1	2	0	1	2	0	0	1	2	0	0	0	2
1	12	1	0	4	0	0	0	2	3	0	1	5	10	9	2	0	0	2	0	1	2	2	2	1	2	0	0	1	0	1	2	0	2	2	2	0	1	0	2
0	11	1	1	8	0	2	0	0	2	2	6	4	5	14	1	1	1	1	1	1	1	0	1	0	1	0	1	1	1	0	1	0	0	1	0	0	1	0	0
1	11	1	0	0	0	0	1	1	0	2	4	4	0	10	0	0	0	0	0	0	0	0	0	0	0	0	0	0	0	0	0	0	0	0	0	0	0	0	0
0	11	1	1	5	0	4	0	4	1	1	3	2	8	7	2	2	1	2	0	0	1	0	0	0	2	0	0	0	0	0	2	0	0	2	1	0	0	0	2
1	10	1	0	3	0	3	0	3	2	1	5	1	6	9	2	0	1	1	0	0	1	0	1	1	2	0	0	1	0	0	1	0	0	1	0	0	0	1	0
1	11	1	0	3	1	3	0	0	2	1	2	3	5	8	1	0	0	1	0	0	1	0	1	0	2	0	0	1	0	2	1	0	0	1	1	0	2	0	1
1	11	1	1	5	1	10	1	10	2	0	2	1	8	5	2	1	0	0	0	0	2	1	2	1	2	0	0	2	0	1	2	0	0	2	2	0	1	0	2
0	14	1	1	4	0	0	1	3	2	0	0	1	10	3	2	0	0	2	0	0	2	1	2	0	2	0	0	2	0	1	2	0	0	2	2	0	1	0	2
0	12	1	1	2	0	0	1	1	4	1	3	1	9	9	2	1	0	2	1	0	2	1	2	0	2	0	1	1	1	2	2	0	0	1	2	0	0	0	1
0	13	1	0	0	0	0	1	1	5	0	2	0	10	7	2	1	1	2	0	0	2	2	2	0	2	0	1	2	0	0	2	0	0	2	1	0	0	1	2
1	13	1	1	3	1	8	1	4	0	1	2	1	7	4	2	0	0	1	0	0	1	0	1	0	2	0	0	1	0	0	2	0	0	1	1	0	0	0	1
1	13	1	1	3	0	0	0	0	3	0	3	1	10	7	2	1	0	2	0	0	2	1	2	0	2	0	0	2	0	1	2	0	1	2	1	0	0	1	1
1	13	1	1	5	1	3	1	3	1	2	2	0	10	5	2	1	0	2	0	0	0	1	2	0	2	0	0	2	1	0	2	0	0	2	2	0	0	0	2
0	13	1	1	3	1	2	1	1	1	0	3	1	8	5	1	1	0	2	0	0	2	0	1	0	2	0	0	1	1	1	2	0	0	2	1	0	0	0	2
1	13	1	1	5	1	9	1	7	1	5	4	0	7	10	2	0	0	1	2	0	1	1	2	0	2	2	0	2	1	0	2	0	0	0	0	0	0	0	1
0	13	1	1	4	1	4	1	8	2	5	3	7	2	17	1	1	1	0	2	2	1	1	1	0	0	0	0	1	1	0	0	1	0	0	2	1	2	0	1
1	13	1	1	4	0	0	1	1	3	3	4	4	6	14	2	1	0	1	1	0	1	2	0	1	0	0	0	1	0	0	2	1	0	1	1	0	1	1	1
0	13	1	1	1	0	0	1	2	0	2	1	1	8	4	1	0	0	2	1	0	1	0	1	0	2	0	0	1	0	0	2	0	0	2	2	0	0	0	1
0	13	1	1	5	1	2	1	1	9	2	0	4	9	15	2	0	2	1	1	2	2	2	2	0	1	0	2	1	0	2	2	0	0	2	2	1	0	1	2
1	14	1	1	7	1	8	1	4	9	3	3	0	10	15	2	1	2	2	1	0	2	2	2	1	2	0	2	2	0	1	2	2	0	2	1	0	0	2	2
0	13	1	1	6	0	0	1	6	5	2	1	1	9	9	2	1	0	2	1	0	1	1	2	0	2	0	1	1	0	2	2	0	0	1	2	0	0	1	2
0	13	1	1	7	1	6	1	5	7	2	4	2	8	15	1	0	1	2	1	1	1	2	2	0	2	0	1	2	1	2	2	0	0	1	0	0	1	1	1
0	13	1	1	6	0	0	1	10	5	3	7	2	9	17	2	2	0	1	2	1	1	2	2	2	2	0	0	1	1	2	2	0	0	2	1	0	0	1	1
0	12	1	1	10	1	9	0	0	5	2	5	1	7	13	2	1	0	1	1	0	1	2	1	2	2	0	2	1	0	1	2	0	0	1	1	0	0	0	1
0	13	1	1	7	1	7	1	9	2	2	5	0	8	9	2	1	0	2	0	0	1	1	1	1	2	1	0	2	1	1	2	0	0	1	1	0	0	0	1
0	13	1	1	7	1	4	1	6	8	1	5	4	8	18	2	1	1	1	0	0	2	1	1	2	0	0	2	1	1	2	2	1	0	2	2	0	1	2	1
0	13	1	1	5	0	0	1	4	0	3	6	1	8	10	1	1	0	2	1	0	0	0	2	0	2	0	0	1	2	0	2	0	0	1	0	0	0	0	1
1	13	1	1	3	0	0	0	1	5	3	6	2	7	16	2	2	1	1	1	1	1	1	1	0	2	0	0	2	2	1	2	1	0	1	1	0	1	2	1
1	13	1	0	3	0	0	0	2	0	1	0	0	7	1	2	0	0	1	0	0	1	0	1	0	2	0	0	2	0	0	2	0	0	1	2	0	0	0	2
1	13	1	0	8	1	7	0	0	4	3	4	1	5	12	1	1	0	1	1	0	0	2	2	0	2	0	1	1	1	1	1	0	0	0	2	0	0	0	0
0	13	1	0	1	0	0	1	1	5	4	5	5	8	19	1	0	1	2	2	1	1	1	1	1	0	0	2	1	2	1	2	1	0	2	1	0	1	0	1
1	13	1	1	8	1	7	0	0	2	6	6	1	5	15	2	1	0	0	2	1	1	1	1	1	2	0	0	2	2	0	1	2	0	1	2	1	0	1	0
1	14	1	0	0	1	3	1	1	7	5	5	5	8	22	2	0	1	2	1	2	0	1	2	1	1	2	1	1	2	2	1	0	1	1	1	0	0	2	1
1	11	1	1	3	1	10	1	8	3	3	5	4	5	15	1	2	0	0	1	1	1	1	1	2	2	0	0	1	1	1	2	1	1	1	2	0	1	1	2
1	13	1	1	7	0	5	1	8	7	3	6	2	10	18	2	0	0	2	1	0	2	2	2	2	2	0	1	2	2	2	2	2	0	2	0	0	2	2	2
1	11	1	1	8	0	0	0	0	8	6	5	3	10	22	2	1	2	2	2	2	2	0	2	2	2	1	2	2	2	2	2	2	0	2	2	1	1	2	2
1	12	1	1	7	0	2	1	6	2	1	1	0	10	4	2	0	0	2	0	0	1	1	2	0	2	0	0	2	0	1	2	0	0	2	1	0	0	0	2
0	11	1	1	5	0	9	0	9	0	3	2	3	7	8	1	0	0	1	1	1	1	0	2	0	2	0	0	1	0	0	2	1	1	1	1	0	0	0	1
0	13	1	0	0	0	0	1	2	0	0	2	0	10	2	2	1	0	2	0	0	2	0	2	0	2	0	0	2	1	0	2	0	0	2	2	0	0	0	2
0	13	1	0	0	0	0	1	4	5	3	3	1	10	12	2	1	0	2	1	0	1	2	2	2	2	0	1	1	0	1	2	1	0	2	2	0	0	1	2
0	13	1	1	2	1	8	1	3	2	2	4	2	8	10	2	1	0	1	1	0	1	0	2	0	2	0	0	1	1	2	2	0	0	1	1	0	1	0	1
0	13	1	1	6	1	7	0	0	3	1	2	0	7	6	1	0	0	1	1	0	2	0	1	0	2	0	0	2	0	2	2	0	0	2	1	0	0	1	1
0	13	1	1	7	1	6	1	6	4	2	3	1	7	10	2	1	1	1	0	0	1	1	1	0	2	1	0	2	1	1	2	0	0	1	2	0	1	1	1
0	13	1	1	8	1	10	1	6	4	3	3	4	10	14	2	1	0	2	2	2	2	2	2	2	2	0	2	2	0	0	2	1	1	2	2	0	1	0	2
0	13	1	1	7	0	0	1	10	3	2	6	1	10	12	2	2	0	2	1	0	1	0	2	0	2	0	1	1	1	0	2	0	0	2	0	0	0	2	1
1	12	1	0	4	0	0	1	8	0	2	3	4	3	9	1	0	0	1	0	0	0	0	0	0	1	0	0	0	1	0	1	0	0	0	2	0	1	0	0
1	13	1	0	9	0	0	1	5	2	4	4	4	5	14	1	0	1	2	1	1	1	0	1	1	2	1	0	0	0	1	1	1	0	0	0	0	1	0	1
0	12	1	1	6	0	0	1	6	5	1	2	1	8	9	2	0	0	1	0	0	1	2	2	0	2	0	0	2	0	2	2	0	0	1	1	0	1	1	1
1	12	1	1	7	0	0	0	0	0	1	1	2	9	4	2	0	0	2	1	0	2	0	2	0	2	0	0	1	0	0	2	0	1	1	1	0	0	0	2
0	13	1	1	10	0	2	0	0	7	0	1	4	8	12	2	0	1	1	0	1	2	1	2	0	1	0	1	1	1	2	2	0	0	1	2	0	1	2	2
0	11	1	1	5	1	6	0	0	0	1	2	3	10	6	2	0	0	2	0	0	1	0	2	0	1	0	0	1	0	0	2	0	1	2	0	0	0	0	2
1	13	1	0	0	1	2	0	0	2	1	3	6	9	12	2	1	0	1	0	2	1	1	2	0	0	0	0	1	1	0	2	0	0	2	1	0	1	1	2
0	13	1	1	10	1	8	1	6	6	2	6	0	8	14	2	1	0	1	1	0	1	2	2	0	2	0	2	2	1	1	2	0	0	1	0	0	0	1	0
0	12	1	1	10	1	5	1	5	6	2	8	2	8	18	2	1	0	1	0	1	0	2	1	2	2	0	1	1	1	2	2	0	0	2	0	0	0	1	0
0	13	1	1	10	1	10	1	10	6	2	5	5	10	18	2	0	0	2	2	2	2	2	2	1	2	0	2	1	2	1	2	0	2	2	2	0	0	1	0
0	13	1	0	2	0	0	1	1	0	4	2	2	7	8	2	0	0	1	0	0	1	0	2	0	2	1	0	2	0	0	1	1	0	1	1	1	2	0	1
1	13	1	1	4	1	8	1	8	5	1	0	2	9	8	2	0	1	1	1	1	2	1	2	0	2	0	1	1	0	2	2	0	0	2	2	0	0	0	2
0	13	1	1	3	1	8	1	2	0	1	0	0	9	1	2	0	0	1	0	0	1	0	2	0	2	0	0	2	0	0	2	0	0	2	2	0	0	0	2
0	13	1	0	3	0	2	0	0	4	2	3	1	5	10	2	1	0	0	1	0	1	2	0	0	2	0	1	2	1	0	2	0	0	1	2	0	1	1	1
0	12	1	1	9	0	1	1	3	9	6	5	7	6	27	1	1	2	1	1	0	1	2	1	2	0	1	2	0	1	1	2	2	2	1	2	1	1	2	1
0	13	1	1	8	0	3	0	0	4	4	4	0	9	12	2	1	1	2	0	0	1	1	2	0	2	0	0	2	1	1	2	2	0	1	1	1	0	1	1
0	15	1	1	4	0	0	0	0	4	3	0	5	7	12	2	0	0	1	1	1	1	1	1	0	1	0	1	0	0	1	2	1	0	1	2	0	1	1	2
0	13	1	1	3	0	0	0	0	0	1	6	0	9	7	2	2	0	2	0	0	1	0	2	0	2	0	0	2	2	0	2	0	0	1	1	0	0	0	1
1	12	1	1	7	1	4	1	10	6	5	5	2	5	18	1	2	1	1	0	0	1	2	1	0	2	0	0	0	1	2	2	2	0	0	0	2	0	1	2
1	12	1	0	10	0	0	0	10	1	2	6	3	3	12	0	2	0	1	0	0	0	0	1	0	1	0	1	2	1	0	1	0	1	0	1	0	1	0	0
0	13	1	1	5	0	0	1	4	2	2	6	0	5	10	1	2	0	1	1	0	1	2	1	0	2	0	0	2	1	0	2	0	0	0	1	0	0	0	0
1	13	1	0	10	0	10	1	10	2	3	3	4	8	12	2	1	0	2	0	1	1	1	0	0	1	1	0	2	0	0	2	0	1	2	2	1	1	1	0
1	14	1	1	7	0	0	1	6	3	2	3	1	8	9	2	1	1	1	0	0	1	1	2	0	2	0	0	2	1	1	2	1	0	1	2	0	1	0	1
0	13	1	1	5	1	7	1	9	7	5	6	5	8	23	2	0	0	1	1	0	0	2	2	2	1	0	2	1	1	2	2	0	2	1	1	2	1	1	0
1	13	1	0	0	0	0	0	0	4	6	6	4	6	20	2	2	0	2	1	0	1	0	0	0	0	0	2	0	0	0	0	2	0	2	0	2	0	2	0
1	15	1	1	8	1	10	1	10	2	8	7	6	0	23	0	2	0	0	0	1	0	1	0	0	1	2	0	0	1	1	0	2	0	0	0	2	2	0	0
1	13	1	1	10	1	6	1	10	1	0	0	1	10	2	2	0	0	2	0	0	2	1	2	0	2	0	0	2	0	0	2	0	0	2	2	0	1	0	2
1	13	1	0	10	0	10	1	9	4	1	1	1	10	7	2	0	0	2	1	0	2	2	2	0	2	0	0	2	1	2	2	0	0	2	2	0	1	0	2
0	12	1	1	8	0	6	1	10	9	3	5	5	9	22	2	1	2	2	1	2	1	2	2	0	2	0	2	1	1	2	2	1	1	1	1	0	1	1	0
1	13	1	1	3	0	1	0	3	2	1	4	2	8	9	0	1	0	2	0	0	1	0	2	1	1	0	0	2	1	1	2	0	1	2	2	0	0	1	1
0	12	1	1	3	0	0	1	3	5	1	1	0	9	7	2	1	1	1	1	0	2	2	2	0	2	0	0	2	0	1	2	0	0	2	2	0	0	1	2
0	12	1	0	0	0	0	0	0	1	1	0	0	6	2	1	0	0	1	0	0	1	0	1	0	2	0	0	2	0	1	2	0	0	1	2	0	0	0	2
0	13	1	0	0	0	0	1	1	1	2	2	0	10	5	2	1	1	2	1	0	1	0	2	0	2	0	0	2	0	0	2	0	0	2	1	0	0	0	2
0	12	1	0	6	0	4	1	7	5	2	1	3	7	11	1	0	0	1	1	0	1	2	2	1	2	0	1	0	0	2	2	0	1	1	2	0	0	0	2
1	12	1	0	0	1	10	1	10	1	4	1	6	5	12	1	0	0	1	1	1	0	0	0	0	0	0	0	2	0	0	2	0	1	1	1	1	2	1	2
1	12	1	1	4	1	9	1	9	7	7	8	4	8	26	2	2	2	1	2	2	1	1	2	2	2	1	1	2	2	2	1	1	1	2	2	2	1	1	0
0	12	1	0	6	1	8	0	0	5	2	0	0	9	7	2	0	1	1	1	0	1	1	2	0	2	0	2	2	0	0	2	0	0	2	2	0	0	1	2
1	12	1	0	0	0	0	0	0	4	0	0	2	10	6	2	0	1	2	0	0	2	0	2	0	2	0	0	1	0	2	2	0	0	2	2	0	1	1	2
0	12	1	1	3	0	0	1	3	4	0	1	2	10	7	2	0	1	2	0	0	2	1	2	0	2	0	0	2	1	1	2	0	1	2	2	0	1	1	2
0	12	1	1	7	0	0	1	5	1	1	3	3	5	8	1	0	0	1	0	0	1	0	1	0	2	0	0	1	1	1	1	0	2	1	2	0	0	0	0
0	12	1	1	7	0	0	1	9	8	5	7	5	9	25	2	2	1	2	2	0	1	2	2	1	0	0	2	0	2	2	2	2	0	1	1	0	1	1	1
0	12	1	1	5	1	5	0	0	6	2	2	0	5	10	1	0	2	0	1	0	1	2	1	0	2	0	0	2	1	1	2	0	0	1	1	0	0	1	2
0	11	1	1	8	0	0	1	8	7	1	0	2	10	10	2	0	1	2	1	0	2	2	2	0	2	0	2	2	0	2	2	0	1	2	2	0	1	0	2
0	11	1	1	4	0	0	1	3	9	0	5	0	7	14	2	2	1	0	0	0	2	2	1	1	2	0	2	2	0	2	2	0	0	2	1	0	0	2	1
1	12	1	1	4	1	3	0	0	4	4	3	3	6	14	1	1	0	1	1	0	1	2	2	1	2	1	1	1	0	1	1	1	1	1	2	0	1	0	1
0	12	1	1	4	1	2	1	3	9	5	6	4	6	24	1	1	2	1	1	0	1	2	1	0	2	2	1	1	2	2	2	1	1	1	0	0	2	2	1
1	12	1	0	3	1	6	0	0	4	2	4	3	7	13	1	1	0	1	0	0	1	2	1	0	2	0	1	0	1	0	2	0	1	2	1	1	0	1	1
0	11	1	1	6	1	7	1	10	5	5	4	2	8	16	2	1	1	2	1	1	0	1	1	0	2	0	1	1	1	1	2	2	0	1	1	0	0	1	1
0	12	1	1	6	1	9	1	5	4	3	6	1	8	14	1	2	0	2	1	0	1	2	2	1	2	0	0	1	0	1	2	1	0	1	0	0	0	1	1
1	12	1	0	3	1	6	1	3	4	3	4	1	7	12	2	1	1	1	1	0	1	1	1	0	2	0	1	1	1	0	2	1	0	1	1	0	0	1	1
0	11	1	1	8	1	5	1	4	9	4	6	0	9	19	2	1	1	2	1	0	1	2	1	2	2	1	2	2	1	2	2	0	0	2	1	1	0	2	1
1	13	1	1	8	1	8	0	0	3	4	3	1	7	11	1	0	0	2	1	0	1	2	1	0	2	1	0	1	1	1	2	1	0	1	1	0	0	0	1
1	14	1	1	7	0	0	1	3	0	2	5	0	9	7	2	1	0	1	0	0	1	0	2	0	2	0	0	2	1	0	2	1	0	2	1	0	0	0	0
1	14	1	1	7	0	0	1	3	0	2	5	0	9	7	2	1	0	1	0	0	1	0	2	0	2	0	0	2	1	0	2	1	0	2	1	0	0	0	0
1	13	1	1	8	0	0	0	0	0	3	5	1	7	9	1	2	0	1	1	0	1	0	2	1	2	1	0	2	0	0	2	0	0	1	1	0	1	0	1
0	13	1	1	6	1	8	1	4	5	2	4	1	6	12	1	2	1	2	1	0	1	2	1	1	2	0	1	2	0	1	1	0	0	1	1	0	1	0	2
1	13	1	1	6	0	0	1	2	5	1	4	6	6	16	1	0	0	1	0	2	1	2	1	0	2	0	1	0	1	1	2	0	1	1	1	0	1	1	0
0	13	1	0	9	1	10	1	6	1	1	2	0	8	4	2	1	0	2	0	0	1	0	2	0	2	0	1	2	0	0	1	0	0	1	1	0	0	0	2
0	12	1	1	8	1	8	1	6	0	1	4	1	7	6	1	1	0	2	0	0	1	0	1	0	2	0	0	2	1	0	2	0	0	1	1	0	1	0	1
0	12	1	1	10	1	7	1	10	1	2	6	1	10	10	2	2	0	2	0	0	0	0	2	0	2	0	0	2	1	1	2	0	0	2	0	0	1	0	1
0	13	1	1	9	1	7	0	0	4	5	3	4	6	16	1	0	0	1	2	1	1	0	1	0	1	1	1	1	1	2	2	1	0	1	1	0	1	1	1
0	14	1	1	7	1	3	1	5	5	4	3	6	9	18	2	0	1	1	2	2	1	1	2	1	2	0	1	1	1	1	2	1	1	2	2	0	2	1	1
1	14	1	1	5	0	0	0	0	8	2	4	7	5	21	2	0	1	0	1	2	1	2	0	0	1	0	2	1	2	2	2	0	1	1	1	0	2	1	1
0	13	1	1	9	1	3	0	0	5	4	6	1	10	16	2	1	2	2	2	0	0	1	2	1	2	0	2	2	1	0	2	0	1	2	0	0	0	0	1
1	12	1	1	7	1	5	0	0	2	2	2	0	5	6	1	0	1	1	1	0	1	0	1	1	2	0	0	2	0	1	1	0	0	1	2	0	0	0	1
1	13	1	1	7	1	7	1	2	0	2	7	1	7	10	2	2	0	1	1	0	1	0	1	1	1	0	0	2	1	0	2	0	0	1	0	0	0	0	1
1	13	1	1	9	1	7	1	8	3	3	4	0	7	10	2	2	0	1	1	0	1	2	1	1	2	0	0	2	1	1	2	0	0	1	2	1	0	0	2
1	13	1	1	8	0	0	1	8	1	2	3	2	5	8	1	1	0	1	1	0	1	1	1	0	1	0	0	1	0	0	1	0	0	1	1	0	0	0	1
1	13	1	0	0	0	0	1	0	2	2	5	5	6	14	1	1	0	1	0	0	1	1	1	1	1	0	0	1	1	0	2	0	1	1	1	1	2	1	1
1	14	1	1	10	1	10	1	10	0	2	3	5	8	10	2	0	0	2	0	1	0	0	0	0	0	0	0	0	0	0	2	0	0	2	1	0	0	0	0
0	13	1	1	10	1	7	1	10	3	4	4	3	7	14	1	2	0	1	1	0	0	1	2	0	2	0	0	1	0	1	2	1	0	1	2	0	2	1	0
0	13	1	1	10	1	7	1	10	3	4	4	3	8	14	2	2	0	1	1	0	0	1	1	0	1	0	0	1	0	1	2	1	0	2	1	0	1	1	1
0	13	1	1	7	0	0	1	4	7	2	5	5	5	19	1	2	0	0	0	1	0	2	1	0	2	0	2	0	1	2	1	0	0	2	0	0	2	1	2
0	13	1	1	2	1	5	0	1	8	3	6	3	8	20	1	1	0	1	2	1	1	2	2	2	2	0	2	1	1	2	2	0	0	2	1	0	1	2	1
1	13	1	0	6	0	8	0	4	0	2	2	2	6	6	2	0	0	0	0	0	0	0	2	0	2	0	0	0	0	0	1	0	0	1	2	0	0	0	0
0	13	1	0	4	0	2	0	0	1	2	2	4	10	9	2	0	0	2	1	2	1	0	2	0	2	0	0	1	1	1	2	0	0	2	2	0	1	0	1
1	13	1	1	10	1	9	1	5	5	0	5	1	8	11	2	2	1	1	0	1	2	2	2	1	2	0	0	2	0	0	2	0	0	1	1	0	0	2	1
1	13	1	1	10	1	8	1	6	5	2	6	5	10	18	2	1	0	2	1	2	2	2	2	2	1	0	1	1	1	1	2	1	1	2	1	0	0	1	1
0	13	1	1	7	1	7	1	7	1	2	3	0	8	6	2	0	0	1	1	0	1	0	2	0	2	0	0	2	1	1	2	0	0	1	1	0	0	0	1
0	13	1	1	6	1	8	1	2	1	1	4	0	10	6	2	0	0	2	0	0	1	1	2	0	2	0	0	2	0	0	2	0	0	2	0	0	0	0	0
0	13	1	1	8	1	10	1	8	7	5	8	2	7	22	1	2	0	2	2	0	0	2	2	2	2	1	1	1	2	2	1	0	0	1	1	0	1	2	1
0	13	1	1	7	1	10	1	9	5	2	3	0	9	10	2	2	0	1	0	0	0	2	2	0	2	0	0	2	0	1	2	0	0	2	2	0	0	2	1
0	12	1	1	4	0	0	1	3	2	1	1	2	9	6	2	1	0	2	0	0	1	1	2	0	2	0	0	1	0	1	2	0	0	1	2	0	1	0	2
0	13	1	1	3	0	1	1	4	4	0	2	2	10	8	2	0	1	2	0	0	2	1	2	0	2	0	0	1	1	1	2	0	0	2	1	0	1	1	2
1	13	1	1	10	0	10	1	6	4	4	4	4	8	16	1	1	1	1	2	0	1	1	2	0	1	0	0	1	1	1	2	1	1	2	1	0	1	1	1
1	13	1	1	6	1	4	0	0	0	2	3	1	7	6	1	0	0	1	1	0	1	0	2	0	2	0	0	2	1	0	2	0	0	1	1	0	1	0	1
0	13	1	1	6	0	0	1	3	3	2	3	2	9	10	2	2	0	1	1	0	1	1	2	0	2	0	1	1	0	1	2	0	1	2	2	0	0	0	1
0	13	1	1	3	1	5	1	6	7	4	6	5	6	22	1	2	2	1	2	1	0	1	2	1	1	0	2	0	1	1	1	0	0	1	1	0	1	1	1
0	13	1	1	4	0	0	0	0	2	1	0	1	10	4	2	0	0	2	1	0	2	1	2	0	2	0	1	2	0	0	2	0	0	2	2	0	1	0	2
0	14	1	1	7	0	0	1	2	2	1	1	2	9	6	2	0	0	2	0	0	1	1	2	0	2	0	0	2	0	1	2	0	0	1	2	0	2	0	1
0	13	1	1	9	1	7	0	0	5	5	3	1	9	14	2	0	0	2	1	0	1	2	1	1	2	2	2	2	1	1	2	0	1	2	2	1	0	0	1
1	13	1	0	0	1	5	0	0	1	2	3	0	6	6	2	0	1	2	1	0	1	0	1	2	2	0	0	2	0	0	0	0	0	1	1	0	0	0	2
0	13	1	1	9	1	7	1	6	4	1	4	1	10	10	2	0	0	2	1	0	2	2	2	1	2	0	0	1	1	1	2	0	0	2	1	0	0	1	1
0	13	1	1	9	0	0	1	6	4	1	2	2	7	9	2	0	1	1	0	0	1	1	2	0	2	0	0	1	0	1	1	0	0	1	1	0	1	1	1
1	12	1	1	9	1	10	0	4	1	1	3	0	8	5	2	1	0	1	1	0	2	0	1	0	2	0	0	2	1	1	2	0	0	2	1	0	0	0	2
1	12	1	1	9	1	8	1	6	1	0	1	1	7	3	2	1	0	1	0	0	2	0	1	0	2	0	0	1	0	1	2	0	0	1	2	0	0	0	2
0	14	1	1	10	1	10	1	10	5	5	5	1	10	16	2	2	0	2	2	0	1	2	2	1	2	0	0	2	1	2	2	2	0	2	2	0	1	1	1
0	13	1	1	9	1	1	1	4	3	1	1	1	10	6	2	0	0	2	1	0	2	2	2	0	2	0	1	2	0	0	2	0	0	2	2	0	1	0	1
0	13	1	1	6	0	0	0	0	1	1	3	0	8	5	2	0	0	1	0	0	1	1	2	0	2	0	0	2	0	0	2	0	0	1	0	0	0	0	1
1	13	1	0	4	0	0	1	6	2	1	0	5	9	8	2	0	0	2	1	2	2	2	1	0	1	0	0	1	0	0	2	0	0	2	2	0	1	0	2
1	14	1	1	8	1	8	1	3	0	1	0	0	8	1	1	0	0	2	0	0	1	0	2	0	2	0	0	2	0	0	2	0	0	1	2	0	0	0	2
1	13	1	1	3	1	8	1	7	3	1	3	2	9	9	1	1	1	2	0	0	1	1	2	0	1	0	0	2	0	1	2	0	0	2	1	0	1	0	1
0	12	1	1	5	0	0	0	0	4	2	4	2	8	12	2	0	0	1	0	0	1	1	2	1	2	0	0	2	1	2	2	1	0	1	1	0	2	1	1
1	12	1	1	10	1	7	0	0	2	1	1	0	6	4	1	0	0	2	1	0	2	0	2	0	2	0	1	2	0	1	1	0	0	0	1	0	0	0	2
1	12	1	0	4	1	3	0	3	0	1	1	0	9	2	2	1	0	2	0	0	1	0	2	0	2	0	0	2	0	0	2	0	0	1	2	0	0	0	2
1	13	1	1	8	1	10	1	10	0	2	6	0	8	8	2	1	0	1	0	0	1	0	2	2	2	0	0	2	1	0	2	1	0	1	1	0	0	0	1
1	13	1	0	0	1	4	1	2	2	3	3	0	7	8	1	0	0	1	1	0	1	0	1	0	2	0	0	2	1	1	2	0	0	2	1	1	0	1	1
1	12	1	1	10	1	10	0	10	2	2	4	1	8	9	2	1	0	2	1	0	1	2	1	0	1	0	0	2	2	0	2	0	0	1	2	0	0	0	1
1	13	1	1	7	1	6	1	2	0	1	1	2	8	4	1	0	0	2	0	0	2	0	2	0	1	1	0	1	0	0	2	0	0	1	1	0	0	0	2
1	12	1	0	0	0	0	1	3	3	3	6	4	2	16	1	2	1	0	1	2	0	1	0	0	0	0	1	2	0	0	1	0	0	0	0	0	0	0	0
1	13	1	1	7	1	9	1	6	2	0	3	0	9	5	2	2	0	1	0	0	2	2	2	1	2	0	0	2	0	0	2	0	0	2	2	0	0	0	2
1	13	1	1	2	0	0	1	4	1	1	2	2	9	6	2	1	0	2	1	0	2	1	2	1	2	0	0	2	0	0	2	0	0	1	2	0	2	0	2
1	13	1	1	6	0	0	0	0	4	6	5	4	8	19	2	1	2	1	2	1	1	2	2	1	1	2	0	1	1	0	2	1	1	1	1	0	0	0	1
1	13	1	1	2	0	2	1	5	2	2	1	0	8	5	1	0	0	2	0	0	0	0	2	1	2	0	2	2	0	0	2	0	0	1	2	0	0	0	2
1	11	1	1	8	0	0	1	5	0	1	1	0	6	2	1	0	0	1	0	0	1	0	1	0	2	0	0	2	0	0	2	0	0	1	1	0	0	0	2
0	12	1	1	5	1	3	0	0	3	1	1	5	7	10	1	0	1	1	0	1	1	2	2	0	2	0	0	1	0	0	1	0	2	2	1	0	1	0	2
1	13	1	1	2	1	1	1	3	4	3	5	1	8	13	2	1	0	1	1	0	1	2	2	1	2	0	0	1	1	2	2	1	0	1	0	0	0	0	2
1	12	1	1	5	0	0	0	0	0	0	0	0	9	0	2	0	0	2	0	0	2	0	2	0	2	0	0	2	0	0	2	0	0	1	2	0	0	0	2
1	12	1	1	1	1	2	0	0	1	1	3	3	9	8	2	1	0	1	0	1	2	1	2	0	2	0	0	2	1	0	2	1	0	2	1	0	2	0	2
1	12	1	1	7	1	1	0	0	2	1	1	1	10	5	2	0	1	2	0	0	1	1	2	0	2	0	0	1	0	0	2	0	0	2	1	0	0	0	2
0	12	1	0	0	0	0	0	0	5	7	4	5	6	21	1	2	0	1	2	1	0	1	2	0	2	0	2	0	1	2	1	2	0	1	2	1	2	0	1
1	13	1	0	0	0	0	0	0	9	1	6	5	7	21	2	1	2	1	1	1	2	2	1	0	2	0	1	1	2	2	2	0	1	1	1	0	2	2	0
0	13	1	1	7	0	0	1	8	6	3	4	10	7	23	2	0	0	2	1	2	1	2	1	2	0	0	2	0	1	1	2	1	2	0	2	0	2	1	1
1	13	1	0	0	1	8	1	2	5	1	5	1	6	12	2	2	0	1	0	0	1	2	1	0	2	0	0	2	1	1	2	0	0	0	1	0	1	2	1
1	13	1	0	0	0	0	0	0	2	2	3	2	8	9	2	1	0	1	0	0	1	0	2	0	1	0	1	1	0	1	2	0	0	1	1	1	0	0	1
0	13	1	1	6	1	7	1	3	6	3	2	1	8	12	0	0	1	2	2	0	1	1	2	1	2	0	2	2	1	2	2	0	0	2	2	0	1	0	2
0	13	1	1	7	0	0	0	0	7	3	5	1	10	16	2	1	1	2	2	0	1	2	2	1	2	0	2	1	1	1	2	0	0	2	1	0	0	1	1
1	13	1	0	8	0	0	1	3	1	1	1	1	9	4	2	0	0	1	0	0	1	0	2	1	2	0	0	2	0	1	2	0	0	2	2	0	1	0	2
1	12	1	1	9	0	5	0	5	1	1	3	1	6	6	2	1	0	1	0	0	1	0	1	0	1	0	0	2	0	1	1	0	0	1	1	0	0	0	1
1	13	1	0	6	1	7	1	3	2	4	0	3	8	9	2	0	0	1	1	0	0	0	2	0	2	0	1	1	0	1	2	1	0	1	2	0	2	0	2
1	13	1	1	10	0	0	1	2	2	3	4	1	10	10	2	1	0	2	1	0	2	1	2	1	2	0	0	2	1	1	2	2	0	2	1	0	1	0	2
0	13	1	1	7	1	8	1	8	7	3	1	4	10	15	2	0	0	2	2	1	2	2	2	1	2	0	1	2	0	2	2	1	2	2	2	0	1	2	2
1	13	1	1	7	1	5	1	2	3	5	6	1	7	15	1	1	1	2	1	0	1	2	1	2	2	2	0	2	1	0	2	0	0	1	0	1	1	0	2
0	13	1	0	5	1	8	1	3	4	2	1	5	7	12	2	0	0	1	0	0	1	1	1	1	2	0	1	0	0	1	2	1	2	1	2	0	1	1	2
1	13	1	0	3	1	2	1	1	1	4	3	0	6	8	1	0	0	1	1	0	0	1	1	0	2	0	0	2	1	0	2	1	0	1	2	0	0	0	0
1	13	1	0	0	0	0	0	0	0	1	2	0	10	3	2	1	0	2	0	0	1	0	2	0	2	0	0	2	0	0	2	0	0	2	1	0	0	0	2
1	13	1	0	0	0	0	1	5	0	1	2	0	9	3	2	0	0	2	0	0	1	0	1	0	2	0	0	2	0	0	2	0	0	2	1	0	0	0	1
0	13	1	1	6	0	0	1	2	4	2	3	0	10	9	2	2	0	2	1	0	1	0	2	0	2	0	1	2	1	1	2	0	0	2	2	0	0	2	2
1	13	1	1	7	0	3	1	7	4	6	6	4	8	20	2	1	1	1	2	1	0	0	1	1	0	0	1	2	2	2	2	1	0	2	1	1	1	0	1
1	14	1	0	10	0	10	1	8	2	3	4	5	9	14	2	1	1	2	1	0	1	1	2	1	1	0	0	0	1	0	2	1	0	1	2	0	2	0	1
1	13	1	1	6	1	5	1	3	3	3	4	0	7	10	1	0	0	2	1	0	1	1	1	1	2	0	0	2	1	1	2	0	0	1	1	1	0	1	1
0	13	1	1	8	1	8	1	1	4	3	0	2	10	9	2	0	0	2	1	0	1	2	2	0	2	0	1	1	0	1	2	1	1	2	2	0	0	0	2
1	13	1	1	8	0	10	1	2	2	1	0	3	8	6	2	0	1	2	0	0	2	0	1	0	1	0	0	1	0	1	2	1	1	1	2	0	0	0	2
0	12	1	1	3	0	10	1	5	5	2	7	5	9	19	2	1	1	2	1	2	1	1	2	1	2	0	1	1	2	2	1	0	1	2	1	0	1	0	0
1	12	1	0	0	0	0	0	0	0	0	1	1	10	2	2	0	0	2	0	0	2	0	2	0	1	0	0	2	0	0	2	0	0	2	2	0	0	0	1
1	13	1	0	0	1	7	1	7	1	2	1	2	9	6	2	0	0	1	1	0	1	1	2	0	2	0	0	1	0	0	2	0	0	2	1	0	1	0	2
0	11	1	0	2	0	0	0	0	3	0	1	3	10	7	2	0	0	2	0	0	2	1	2	1	2	0	0	1	0	1	2	0	0	2	2	0	2	1	2
1	11	1	1	10	1	7	0	0	1	4	7	3	9	15	2	2	1	2	1	0	1	0	2	1	2	0	0	2	1	0	1	2	2	2	0	0	1	0	1
0	13	1	1	5	1	10	1	10	4	3	6	3	9	16	1	0	0	2	1	0	1	1	2	1	2	1	0	1	2	1	2	0	0	2	0	0	2	2	1
0	12	1	1	2	1	7	0	0	1	3	2	0	8	6	1	2	0	2	0	0	0	1	1	0	2	1	0	2	0	0	2	0	0	2	2	0	0	0	2
1	12	1	1	10	1	10	1	10	6	4	4	4	8	18	2	1	2	1	2	0	2	2	1	2	2	0	2	1	0	0	2	2	2	2	2	0	1	0	1
1	12	1	1	3	1	2	1	1	0	0	0	3	8	3	2	0	0	0	0	0	2	0	2	0	2	0	0	2	0	0	2	0	2	2	2	0	1	0	2
0	13	1	0	2	0	0	0	0	0	0	2	2	9	4	2	0	0	2	0	0	2	0	1	0	2	0	0	1	0	0	2	0	1	2	2	0	0	0	0
0	12	1	1	3	0	0	0	0	1	1	4	1	9	7	2	1	0	1	0	0	1	1	2	1	2	0	0	1	0	0	2	0	0	2	1	0	0	0	1
0	12	1	1	8	1	7	1	7	2	1	0	0	10	3	2	0	0	2	1	0	2	0	2	0	2	0	0	2	0	2	2	0	0	2	2	0	0	0	2
1	12	1	1	4	0	0	1	1	1	3	3	1	6	8	2	0	1	0	0	0	1	0	2	0	2	0	0	1	0	0	2	1	0	0	0	1	0	0	1
0	12	1	1	8	1	8	1	4	2	1	4	1	5	8	1	1	1	0	1	0	2	1	2	0	2	0	0	2	1	0	2	0	0	0	1	0	1	0	1
0	13	1	1	8	1	8	1	4	2	1	4	1	3	8	1	1	1	0	1	0	2	1	1	0	2	0	0	2	1	0	1	0	0	0	1	0	1	0	1
1	12	1	0	0	0	0	0	0	1	1	4	4	4	10	2	0	0	1	0	0	1	1	0	0	0	0	0	0	0	0	0	0	0	1	0	0	0	0	0
0	12	1	0	3	0	0	0	0	1	0	1	2	10	4	2	0	0	2	0	0	2	1	2	1	2	0	0	2	0	0	2	0	0	2	2	0	2	0	2
1	13	1	1	5	0	0	1	4	0	0	1	0	5	1	1	0	0	1	0	0	2	0	1	0	2	0	0	2	0	0	1	0	0	1	2	0	0	0	1
1	12	1	1	8	1	10	1	10	0	0	4	2	8	6	2	1	0	1	0	0	2	0	1	1	2	0	0	2	1	0	2	0	0	2	2	0	2	0	1
0	13	1	1	5	1	3	0	0	2	2	3	0	9	7	1	2	0	2	1	0	1	0	2	0	2	0	0	2	0	1	2	0	0	2	1	0	0	1	2
1	12	1	1	3	1	5	1	5	0	1	2	2	5	5	1	0	0	1	0	0	1	0	1	0	1	0	0	1	0	0	1	0	0	1	1	0	0	0	1
1	12	1	0	0	1	8	1	1	0	1	4	1	6	6	1	1	0	1	0	0	1	0	1	0	2	0	0	2	1	0	2	0	0	1	1	0	1	0	1
1	12	1	1	10	1	8	0	7	0	1	3	2	7	6	1	0	0	2	0	0	1	0	1	0	2	0	0	1	1	0	2	0	0	1	1	0	1	0	1
1	12	1	1	10	0	0	1	8	1	3	2	3	7	9	1	0	0	1	0	0	1	0	2	0	2	0	1	1	0	0	2	2	1	1	0	0	1	0	2
0	12	1	0	4	1	6	0	0	5	1	3	2	9	11	1	1	0	2	0	0	1	2	2	0	2	0	1	1	0	0	2	0	0	2	1	0	1	2	1
0	12	1	1	10	1	10	1	6	4	3	2	5	8	14	2	0	0	2	0	0	2	2	2	2	2	0	0	0	0	2	2	2	2	0	2	1	1	0	2
1	12	1	1	3	0	0	0	1	1	0	3	2	10	6	2	1	0	2	0	0	2	0	2	1	2	0	0	1	0	1	2	0	1	2	1	0	0	0	2
1	13	1	1	2	1	2	0	0	4	4	3	4	6	15	2	0	1	1	2	0	0	2	1	1	1	0	1	1	0	0	1	0	1	1	1	0	1	0	1
0	12	1	1	3	0	0	0	0	8	0	6	2	10	16	2	2	2	2	0	1	2	2	2	1	2	0	1	1	1	2	2	0	0	2	1	0	0	1	1
0	12	1	1	3	0	0	0	0	6	3	4	4	9	17	2	1	2	1	1	0	1	1	2	1	1	0	1	1	1	1	2	1	1	2	2	0	1	1	1
0	12	1	1	6	0	0	1	2	5	4	5	6	9	20	2	1	0	1	2	1	1	2	2	1	0	0	1	2	1	1	2	1	1	2	1	0	2	1	1
0	11	1	0	1	0	1	0	0	0	1	2	0	8	3	2	0	0	2	0	0	1	0	1	0	2	0	0	2	0	0	2	0	0	1	1	0	0	0	1
1	12	1	1	7	0	0	0	0	0	1	3	0	8	4	1	1	0	2	0	0	1	0	2	0	2	0	0	2	0	0	2	0	0	1	1	0	0	0	1
1	11	1	0	9	0	0	0	0	3	3	4	2	9	12	1	1	1	2	1	0	1	2	2	0	2	0	0	1	0	0	2	1	0	2	1	0	1	0	0
1	12	1	1	7	1	2	1	3	1	1	3	0	9	5	2	0	0	2	0	0	1	1	2	0	2	0	0	2	1	0	2	0	0	1	1	0	0	0	1
1	12	1	1	6	0	6	0	5	0	1	0	2	10	3	2	0	0	2	0	0	1	0	2	0	2	0	0	2	0	0	2	0	0	2	2	0	2	0	2
1	12	1	1	7	0	0	0	0	1	3	2	2	10	8	2	1	0	2	1	0	1	0	2	0	2	0	0	1	0	1	2	1	0	2	2	0	1	0	1
0	12	1	1	5	0	1	1	2	5	3	3	3	8	14	2	0	1	1	1	1	1	1	2	1	1	0	1	2	0	1	2	1	0	1	1	0	1	1	1
0	12	1	0	3	1	2	1	3	3	2	1	0	10	6	2	0	0	2	1	0	1	1	2	1	2	0	0	2	0	1	2	0	0	2	2	0	0	1	2
0	12	1	0	2	1	3	1	2	3	2	2	2	8	9	2	1	0	1	1	1	2	1	2	1	2	1	1	2	0	1	2	0	0	1	2	0	1	0	2
1	12	1	1	6	1	6	0	0	3	0	3	0	8	6	2	1	0	2	0	0	2	1	1	1	2	0	1	2	1	1	2	0	0	1	2	0	0	0	2
1	11	1	1	8	0	0	1	2	3	5	3	2	7	13	2	0	0	1	2	0	1	2	1	0	1	0	1	1	1	0	2	2	0	1	1	0	0	0	1
1	13	1	1	3	0	0	1	5	3	4	5	2	7	14	1	2	1	2	2	1	1	1	1	0	2	0	0	2	1	1	2	1	0	1	1	0	1	0	1
0	12	1	1	4	1	7	1	5	4	3	4	1	8	12	1	0	1	2	1	0	1	1	2	1	2	1	1	1	1	1	2	0	0	1	1	0	0	0	1
0	11	1	0	0	1	10	1	5	5	5	5	3	9	18	2	2	1	1	2	0	1	1	2	0	2	0	1	1	1	2	2	2	1	2	1	0	1	0	1
1	12	1	1	7	0	0	0	0	2	1	1	3	7	7	2	1	0	1	0	0	2	1	1	0	2	0	0	1	0	0	2	1	2	1	2	0	0	1	2
0	12	1	1	7	1	9	1	6	3	4	5	0	5	12	1	1	1	2	1	0	0	1	1	1	2	0	0	2	0	0	0	0	0	1	1	1	0	1	0
1	12	1	1	8	0	0	1	1	2	2	1	1	9	6	2	1	0	2	1	0	1	1	2	0	2	0	0	2	0	1	2	0	0	1	2	0	1	0	2
1	12	1	1	9	1	5	1	3	1	2	2	0	6	5	1	2	0	2	0	0	1	0	1	0	2	0	1	2	0	0	2	1	0	0	2	0	0	0	2
1	12	1	0	0	0	0	1	2	2	2	2	2	10	8	2	0	0	2	2	0	2	0	2	0	2	0	0	2	1	2	2	0	0	2	2	0	2	0	1
1	12	1	0	3	1	4	1	1	0	1	2	0	9	3	2	1	0	2	0	0	1	0	2	0	2	0	0	2	1	0	2	0	0	1	2	0	0	0	2
1	12	1	1	9	0	0	0	0	2	2	3	1	10	8	2	0	0	2	0	0	1	0	2	1	2	0	0	2	1	1	2	1	1	2	1	0	0	1	2
0	11	1	0	1	0	0	1	2	1	2	2	1	6	6	1	0	0	1	1	0	1	0	1	2	2	0	1	1	0	0	2	0	0	1	2	0	0	0	2
0	12	1	1	9	1	7	0	0	4	2	5	4	10	15	2	1	0	2	1	1	1	2	2	1	2	0	2	1	1	0	2	0	1	2	1	0	1	0	1
1	12	1	1	4	1	3	0	0	3	1	0	1	10	5	2	0	0	2	0	0	2	1	2	0	2	0	1	2	0	1	2	1	1	2	2	0	0	0	2
1	12	1	1	8	0	0	1	3	7	1	0	2	8	10	2	0	1	2	1	1	2	2	2	0	2	0	1	1	0	2	2	0	0	0	2	0	0	1	2
1	12	1	1	7	1	4	0	0	0	3	2	0	7	5	2	0	0	1	1	0	1	0	2	0	2	1	0	2	0	0	1	0	0	1	1	0	0	0	1
0	12	1	1	9	0	0	0	0	0	0	0	0	10	0	2	0	0	2	0	0	2	0	2	0	2	0	0	2	0	0	2	0	0	2	2	0	0	0	2
0	11	1	0	0	1	1	0	0	1	1	0	0	8	2	2	0	0	1	0	0	1	0	1	0	2	0	0	2	0	1	2	0	0	2	2	0	0	0	2
1	13	1	0	4	1	7	1	9	0	5	6	3	3	14	0	1	0	2	1	0	0	0	0	0	1	1	0	1	2	0	1	0	0	0	1	1	1	0	0
0	12	1	1	10	1	9	1	6	6	4	3	1	9	14	2	0	1	2	1	0	1	2	2	0	2	1	2	2	2	0	2	1	1	1	2	0	0	1	1
1	12	1	1	1	0	0	1	2	0	0	0	0	10	0	2	0	0	2	0	0	2	0	2	0	2	0	0	2	0	0	2	0	0	2	2	0	0	0	2
0	12	1	1	3	0	0	0	0	1	1	3	2	9	7	2	0	0	1	1	0	2	0	2	0	2	0	0	1	1	1	2	0	1	2	1	0	0	0	1
1	12	1	1	4	0	0	1	4	3	3	5	2	8	13	2	2	2	2	1	0	1	1	2	1	2	0	0	2	1	0	1	1	1	1	2	0	1	0	1
1	12	1	1	2	0	0	0	0	3	1	4	2	8	10	2	2	0	1	0	0	2	1	2	0	2	0	0	2	0	2	2	1	0	1	1	0	2	0	1
1	11	1	0	0	0	0	1	3	5	2	6	6	3	19	1	0	0	0	0	0	0	1	0	2	0	0	2	1	0	2	0	0	2	2	0	0	1	0	0
1	11	1	0	5	0	0	0	0	7	2	2	3	6	14	1	0	1	1	0	1	1	2	1	0	2	0	1	1	1	1	2	1	1	1	2	0	0	2	1
0	11	1	1	9	1	9	1	7	7	2	1	2	10	12	2	0	2	2	1	0	1	2	2	0	2	0	1	1	0	0	2	0	1	2	1	0	0	2	2
1	12	1	0	3	0	2	1	1	0	2	2	1	7	5	2	1	0	1	0	0	1	0	1	0	2	0	0	1	0	0	2	1	0	1	2	0	0	0	1
0	11	1	0	0	0	0	1	3	5	4	3	4	7	16	2	2	2	1	1	2	1	1	2	1	1	0	0	1	0	1	0	1	0	2	2	1	0	1	2
1	12	1	0	4	0	1	1	4	2	3	8	1	7	14	1	2	0	2	0	0	0	1	1	0	2	1	1	2	2	0	1	0	0	2	0	0	1	0	0
1	12	1	1	10	1	8	1	8	0	4	3	2	8	9	2	0	0	2	1	0	1	0	2	0	2	1	0	2	1	0	1	1	0	1	0	0	2	0	2
1	12	1	1	10	0	0	1	3	3	2	4	3	8	12	2	2	1	2	1	1	1	2	1	0	2	0	0	1	1	0	2	0	0	1	2	0	1	0	1
0	12	1	1	8	0	0	0	0	3	2	0	0	10	5	2	0	0	2	0	0	1	1	2	0	2	0	1	2	0	1	2	1	0	2	2	0	0	0	2
0	12	1	0	2	1	5	1	3	5	2	5	1	7	13	1	1	1	2	1	0	1	1	1	1	2	0	1	1	1	1	2	0	0	1	1	0	0	1	1
1	12	1	1	7	1	6	1	8	3	0	1	1	10	5	2	0	1	2	0	0	2	1	2	1	2	0	1	2	0	0	2	0	0	2	2	0	1	0	2
0	13	1	1	6	0	0	1	8	2	3	6	2	9	13	2	1	0	2	1	1	2	1	2	1	2	1	0	2	1	1	2	1	0	1	1	0	1	0	0
1	12	1	0	3	1	5	1	2	2	3	3	3	10	11	2	1	1	2	0	0	0	1	2	1	2	0	0	2	0	0	2	1	1	2	1	0	2	0	2
1	12	1	1	8	1	9	0	2	0	1	4	2	8	7	2	1	0	2	0	1	1	0	1	0	2	0	0	2	1	0	2	0	0	1	1	0	1	0	1
1	13	1	1	8	1	7	0	0	2	1	4	2	5	9	1	1	0	1	0	0	1	1	1	0	2	0	0	1	1	1	1	0	0	1	1	0	1	0	1
1	11	1	0	0	0	0	0	0	1	0	0	1	10	2	2	0	0	2	0	0	2	1	2	0	2	0	0	1	0	0	2	0	0	2	2	0	0	0	2
0	12	1	1	2	1	4	0	0	3	2	2	0	7	7	1	1	0	2	1	0	1	1	2	0	2	0	1	2	0	0	1	0	0	1	2	0	0	1	1
0	12	1	0	2	1	4	0	0	2	1	6	1	6	10	1	1	0	1	0	0	1	0	1	1	2	0	0	1	2	1	2	0	0	1	1	0	0	1	1
0	12	1	1	8	0	0	1	5	8	5	4	0	9	17	2	1	1	1	2	0	0	2	2	1	2	0	2	2	1	2	2	0	0	2	2	1	0	1	1
1	12	1	1	7	1	9	0	0	4	4	6	3	5	17	1	1	2	1	0	0	0	0	0	0	2	2	0	2	2	1	2	0	1	1	1	0	2	1	0
1	12	1	1	2	0	1	1	5	0	1	2	0	7	3	1	0	0	2	0	0	1	0	1	0	2	0	0	2	0	0	2	0	0	1	1	0	0	0	1
1	13	1	1	5	1	5	0	0	0	4	3	2	6	9	1	1	0	1	0	0	1	0	2	0	2	1	0	2	0	0	1	0	0	1	1	2	2	0	1
0	11	1	1	8	1	5	1	5	4	2	4	0	8	10	1	2	0	2	1	0	1	2	2	0	2	0	0	2	0	1	2	0	0	1	1	0	0	1	1
1	12	1	0	0	0	0	0	0	0	2	3	0	7	5	0	2	0	1	0	0	0	0	2	0	2	0	0	2	1	0	2	0	0	2	2	0	0	0	2
1	12	1	1	8	1	9	1	7	1	0	2	1	7	4	2	0	0	1	0	0	2	0	2	1	2	0	0	2	1	0	1	0	0	1	2	0	1	1	2
0	13	1	1	6	1	3	1	7	1	3	6	2	4	12	1	1	0	1	0	0	1	1	1	0	2	0	0	0	1	0	1	1	0	0	0	1	0	0	0
1	13	1	0	2	0	0	0	0	1	2	5	2	6	10	1	1	0	1	0	0	1	1	1	0	2	0	0	1	1	0	2	1	1	1	0	0	0	0	1
0	11	1	0	1	0	1	0	0	1	0	1	3	10	5	2	0	0	2	0	0	2	1	2	0	2	0	0	1	1	0	2	0	1	2	2	0	1	0	2
1	13	1	1	6	0	0	0	0	0	3	4	1	9	8	2	1	0	1	0	0	1	0	2	0	2	0	0	2	1	0	2	2	0	2	1	0	1	0	1
1	12	1	1	10	0	0	0	0	1	6	4	0	3	11	0	1	0	2	0	0	1	0	1	0	2	1	0	2	1	1	0	2	0	0	1	2	0	0	1
1	12	1	1	7	0	0	1	5	3	3	3	3	7	12	1	0	0	1	0	0	1	1	2	0	0	1	0	2	1	1	1	0	0	2	1	1	1	1	1
1	13	1	0	0	0	0	1	5	5	2	4	3	9	14	2	1	1	2	1	0	2	1	2	0	2	0	1	1	1	1	1	1	1	2	1	0	1	1	1
0	13	1	1	10	1	10	1	9	1	3	6	0	6	10	1	1	1	2	1	0	1	0	0	0	2	1	0	2	2	0	2	0	0	1	1	0	0	0	0
1	13	1	1	8	1	8	1	7	1	1	1	0	5	3	1	0	0	1	0	0	1	1	1	0	2	0	0	2	0	0	1	0	0	1	2	0	0	0	1
1	12	1	1	7	0	0	0	0	2	4	6	4	6	16	1	2	0	0	2	1	1	1	2	0	2	0	0	0	2	1	1	1	1	2	1	0	0	0	1
1	13	1	1	3	1	2	0	0	0	1	1	0	7	2	1	0	0	2	0	0	1	0	1	0	2	0	0	2	0	0	2	0	0	1	1	0	0	0	2
1	13	1	1	0	1	4	0	0	4	2	4	4	6	14	2	0	1	2	0	1	1	1	0	1	2	0	1	1	1	1	1	1	0	1	1	0	2	0	1
1	13	1	0	3	0	0	0	0	1	3	1	3	7	8	1	0	0	1	2	0	1	0	1	0	2	0	1	1	0	0	2	0	1	2	1	0	1	0	2
1	13	1	0	6	0	6	0	5	2	1	3	4	6	10	1	0	1	1	0	0	1	0	1	0	1	0	1	0	1	0	2	0	0	1	1	0	1	0	1
1	13	1	0	0	1	4	0	0	3	2	3	1	6	9	1	0	0	2	0	0	1	1	1	0	2	0	1	2	1	1	2	1	0	0	0	0	1	0	2
1	13	1	1	2	1	4	1	5	0	1	0	1	9	2	2	0	0	1	0	0	1	0	2	0	2	0	0	2	0	0	2	0	0	2	2	0	1	0	2
1	13	1	1	4	0	0	0	0	4	4	7	4	6	19	1	2	0	2	1	0	1	2	1	1	2	0	0	1	2	2	2	2	1	0	1	0	2	0	1
0	13	1	0	3	0	2	0	0	0	0	0	2	9	2	2	0	0	1	0	0	2	0	2	0	1	0	0	1	0	0	2	0	0	2	2	0	0	0	2
1	13	1	1	6	0	0	0	1	4	1	0	0	9	5	2	0	0	1	1	0	2	1	2	0	2	0	0	2	0	2	2	0	0	2	2	0	0	1	2
1	12	1	0	1	0	0	0	0	0	0	0	0	9	0	2	0	0	1	0	0	2	0	2	0	2	0	0	2	0	0	2	0	0	2	2	0	0	0	2
1	13	1	1	8	0	0	1	7	3	0	0	0	8	3	2	0	0	1	0	0	2	1	2	0	2	0	0	2	0	1	2	0	0	1	2	0	0	1	2
1	13	1	1	4	0	0	0	0	2	2	2	7	7	13	1	0	0	1	1	2	1	2	2	0	2	0	0	0	1	0	2	0	2	1	1	0	1	0	2
1	13	1	1	10	1	7	1	6	0	1	3	0	7	4	1	1	0	2	0	0	1	0	1	0	2	0	0	2	0	0	2	0	0	1	1	0	0	0	1
1	13	1	1	3	1	3	1	2	1	1	3	2	8	7	2	1	0	1	0	0	1	0	1	0	2	0	0	2	0	1	2	0	0	2	1	0	2	0	1
0	13	1	1	10	1	8	1	9	8	1	2	3	9	14	2	1	2	1	1	0	2	2	2	1	2	0	1	1	0	1	2	0	1	2	2	0	1	2	2
0	13	1	1	8	1	2	1	9	7	2	6	0	7	15	2	1	1	1	1	0	1	2	2	1	2	0	2	2	1	1	1	0	0	1	1	0	0	1	0
1	13	1	1	7	1	7	1	8	0	1	0	0	10	1	2	0	0	2	0	0	2	0	2	0	2	0	0	2	0	0	2	1	0	2	2	0	0	0	2
0	13	1	1	5	0	0	0	0	4	1	5	0	10	10	2	1	1	2	0	0	1	2	2	1	2	0	0	2	1	0	2	0	0	2	1	0	0	1	1
1	14	1	1	8	1	8	0	0	4	2	2	0	6	8	1	0	1	2	0	0	1	1	1	0	2	0	0	2	1	1	2	1	0	0	2	0	0	1	1
1	13	1	1	9	1	8	0	1	4	2	3	1	6	10	1	1	0	1	1	0	1	1	2	1	2	0	2	2	0	0	1	0	1	1	2	0	0	1	1
0	13	1	0	0	1	2	1	2	1	3	0	5	9	9	2	0	0	2	1	0	0	1	2	0	1	0	0	0	0	0	2	0	1	1	2	0	1	0	2
1	13	1	1	6	1	3	1	1	5	2	4	3	5	14	1	0	0	1	1	0	1	2	1	2	2	0	1	1	1	1	1	0	2	1	2	0	0	1	1
1	13	1	1	4	0	0	0	1	0	1	2	0	8	3	2	0	0	2	0	0	1	0	1	0	2	0	0	2	0	0	2	0	0	1	1	0	0	0	1
1	13	1	0	0	0	0	0	0	9	5	9	8	7	31	2	2	1	1	2	2	1	2	2	2	0	0	2	0	1	2	2	2	2	0	0	0	0	2	0
0	12	1	1	8	1	8	1	8	4	2	3	2	6	11	1	1	1	1	0	0	1	1	1	0	1	0	1	1	0	0	2	1	0	1	1	0	0	1	1
1	12	1	0	0	0	0	0	0	1	1	1	1	10	4	2	1	1	2	0	0	1	0	2	0	2	0	0	2	0	0	2	0	0	2	2	0	1	0	2
0	13	1	0	0	0	1	0	0	0	0	0	0	10	0	2	0	0	2	0	0	2	0	2	0	2	0	0	2	0	0	2	0	0	2	2	0	0	0	2
0	13	1	0	0	0	0	0	0	7	1	1	6	9	15	2	0	2	2	0	1	2	1	2	0	1	0	1	0	0	2	2	1	2	1	1	0	0	1	2
0	13	1	1	7	1	6	1	7	2	2	2	0	10	6	2	0	1	2	1	0	1	0	2	0	2	0	0	2	1	0	2	0	0	2	2	0	0	1	1
0	13	1	1	6	1	2	1	9	1	1	0	2	7	4	1	0	0	1	0	2	2	1	2	0	2	0	0	2	0	0	2	0	0	1	2	1	0	0	2
1	13	1	1	8	1	9	1	1	3	6	6	2	5	17	0	0	1	2	2	1	0	0	1	2	2	1	0	1	2	2	1	0	0	1	2	1	0	0	0
1	13	1	1	3	1	5	1	5	4	3	5	6	7	18	2	1	0	1	1	2	1	1	1	2	2	0	1	1	1	1	2	1	1	1	2	0	2	1	1
0	13	1	1	4	1	1	1	9	1	2	2	0	9	5	2	0	0	2	1	0	1	0	2	1	2	0	0	2	0	1	2	0	0	1	1	0	0	0	2
0	13	1	1	7	1	4	1	4	1	0	3	0	7	4	2	1	1	1	0	0	2	0	1	0	2	0	0	2	0	0	2	0	0	1	0	0	0	0	2
0	13	1	1	6	0	0	1	5	3	2	0	1	9	6	2	0	1	2	1	0	1	1	1	0	1	0	0	2	0	1	2	0	0	2	2	0	0	0	2
0	12	1	1	6	1	9	1	6	4	2	5	1	10	12	2	1	1	2	1	0	1	0	2	2	2	0	0	1	0	2	2	0	0	2	1	0	0	1	1
1	11	1	1	4	0	0	1	4	6	0	2	3	7	11	1	0	2	1	0	1	2	2	2	0	1	0	0	2	0	0	2	0	1	1	1	0	0	2	1
0	13	1	1	7	0	9	1	8	2	2	0	0	8	4	2	0	1	2	1	0	1	0	1	0	2	0	0	2	0	1	2	0	0	1	2	0	0	0	2
0	11	1	1	1	0	0	1	2	2	0	2	3	8	7	2	1	0	1	0	1	2	0	2	1	2	0	0	1	0	2	2	0	0	1	2	0	1	0	2
1	10	1	0	0	1	5	0	0	3	0	2	1	8	6	2	0	0	1	0	0	2	1	1	0	2	0	0	1	0	1	2	0	0	2	1	0	0	1	1
1	11	1	0	5	1	10	1	10	2	2	3	3	7	10	1	0	1	2	0	0	1	0	2	0	2	1	0	1	1	1	1	0	0	1	1	0	2	0	1
1	11	1	0	7	0	4	0	5	2	0	2	3	8	7	2	0	2	2	0	0	2	0	0	0	2	0	0	2	0	0	2	0	1	2	2	0	2	0	0
0	11	1	1	3	0	0	1	2	0	1	3	1	8	5	2	0	0	2	1	0	2	0	2	1	2	0	0	1	0	0	0	0	0	2	1	0	0	0	1
0	11	1	1	3	0	0	0	0	3	1	3	4	4	11	1	0	1	0	0	0	1	2	0	0	1	0	0	1	0	0	2	0	1	1	1	0	1	0	0
0	12	1	0	0	0	0	0	0	0	2	1	3	10	6	2	0	0	2	0	1	1	0	2	0	2	0	0	1	0	0	2	1	0	2	2	0	1	0	1
0	13	1	1	8	1	10	0	0	6	10	10	6	0	32	0	2	2	0	2	2	0	2	0	2	1	2	2	2	2	0	0	2	1	0	0	2	2	0	0
0	13	1	1	10	0	2	1	8	4	1	1	0	8	6	1	0	0	2	1	0	2	1	1	1	2	0	1	2	0	1	2	0	0	2	2	0	0	1	2
0	12	1	1	4	0	0	1	2	6	2	3	1	8	12	2	0	2	2	0	0	1	2	1	0	2	0	0	2	1	1	2	0	1	1	1	1	0	1	1
0	12	1	1	7	1	4	1	6	6	4	5	4	8	19	1	1	1	2	1	1	2	1	1	1	2	1	2	1	1	1	2	1	1	2	1	1	1	1	1
1	12	1	1	8	1	10	1	5	5	5	2	2	6	14	1	0	0	1	2	1	0	1	1	0	2	0	1	2	1	1	2	1	0	1	2	0	1	2	1
1	12	1	1	10	1	9	1	9	4	4	4	2	6	14	1	0	1	2	0	0	0	1	0	0	2	1	0	2	1	1	2	1	0	1	0	0	2	1	1
0	13	1	1	7	0	0	1	5	2	5	3	1	8	11	1	2	1	2	1	0	0	1	2	0	2	1	0	2	0	0	2	1	1	1	1	0	0	0	2
0	11	1	1	8	0	0	1	3	3	1	1	0	5	5	1	0	1	0	1	0	2	2	1	0	2	0	0	2	0	0	2	0	0	1	2	0	0	0	1
1	12	1	1	2	0	0	1	2	2	1	4	0	10	7	2	1	0	2	1	0	2	0	2	1	2	0	0	2	1	2	2	0	0	2	1	0	0	0	2
0	11	1	1	9	1	8	1	6	9	2	2	3	9	16	2	0	1	1	2	1	2	2	2	1	1	0	2	2	1	2	2	0	0	2	2	0	1	2	2
1	12	1	1	5	0	0	1	2	0	1	3	1	7	5	2	0	0	1	0	0	1	0	1	1	2	0	0	1	1	0	2	0	0	1	2	0	0	0	1
0	10	1	1	6	0	0	0	0	7	2	6	4	7	19	2	1	0	0	2	1	2	1	2	1	0	0	2	1	2	2	2	0	0	1	2	0	0	2	0
1	11	1	1	6	0	0	1	7	1	0	2	1	10	4	2	0	0	2	0	0	2	0	2	1	2	0	0	2	1	1	2	0	0	2	2	0	1	0	2
1	13	1	1	5	0	0	1	2	1	0	2	2	8	5	2	0	0	2	0	1	2	0	1	0	2	0	0	1	1	1	2	0	0	1	1	0	0	0	2
1	11	1	1	7	1	3	1	2	1	4	5	3	6	13	1	1	0	1	1	0	0	1	1	0	2	0	0	1	1	0	2	1	0	1	0	0	2	0	1
1	11	1	0	5	0	1	1	4	0	2	2	0	9	4	2	0	0	2	1	0	2	0	2	0	2	0	0	2	0	0	2	1	0	1	1	0	0	0	1
0	11	1	1	9	1	8	0	0	3	0	0	0	9	3	2	0	0	1	0	0	2	1	2	0	2	0	0	2	0	2	2	0	0	2	2	0	0	0	2
0	11	1	1	9	1	7	1	7	3	5	7	1	6	16	1	2	0	1	1	0	1	1	2	1	2	1	1	1	1	0	1	1	0	1	1	1	0	1	0
1	11	1	1	6	0	3	0	0	1	1	2	1	10	5	2	0	0	2	1	0	2	0	2	1	2	0	1	1	0	0	2	0	0	2	1	0	0	0	2
0	11	1	1	10	0	0	0	2	4	2	2	2	10	10	2	0	0	2	1	0	1	2	2	0	2	0	0	0	0	1	2	0	0	2	1	0	0	1	1
1	11	1	1	9	0	1	0	2	5	5	4	3	7	17	1	1	2	2	2	0	1	2	1	1	2	0	0	1	1	1	2	1	0	1	2	1	2	0	1
0	11	1	0	2	0	0	0	0	2	0	1	1	7	4	2	0	0	1	0	1	2	1	1	0	2	0	0	2	0	1	2	0	0	1	1	0	0	0	2
1	11	1	1	2	1	3	0	0	6	1	4	2	10	13	2	1	1	2	0	0	2	2	2	0	0	0	1	2	1	2	2	1	0	2	1	0	0	0	1
1	11	1	1	5	1	3	1	3	2	3	4	2	4	11	1	1	0	1	1	0	1	1	1	0	2	1	0	2	1	1	1	0	1	0	1	0	1	0	1
1	11	1	1	8	0	0	1	2	4	3	5	2	5	14	1	2	0	1	1	0	1	1	1	1	2	0	1	1	0	1	1	1	0	1	1	0	1	1	1
1	11	1	0	0	1	7	0	0	3	1	3	3	7	10	1	0	0	1	0	0	1	1	2	1	2	0	1	1	0	1	2	0	0	1	2	0	2	0	0
[truncated: 860 more rows]
